# Supplementary material for: Cu-Photoredox-catalyzed C(sp)–C(sp3) coupling of redox-active esters with terminal alkynes
Source: Royal Society of Chemistry journal article supplement (doi:10.1039/d0ob00835d), 2020-01-01

# Cu-Photoredox-Catalyzed C(sp)-C(sp<sup>3</sup>) Coupling of Redox-Active Esters with Terminal Alkynes

Yajing Zhang, Dayong Zhang \*

School of Science, China Pharmaceutical University, Nanjing 210009, P.R. China

\* Corresponding author email: [zhangdayong@cpu.edu.cn](mailto:zhangdayong@cpu.edu.cn)

## Table of Contents

|                                                                |     |
|----------------------------------------------------------------|-----|
| 1 General Information.....                                     | S2  |
| 2 Experimental Details .....                                   | S2  |
| (1) Optimization of the reaction conditions.....               | S2  |
| (2) Reaction setup .....                                       | S3  |
| (3) General procedure and characterizations of products .....  | S4  |
| (4) Gram-Scale Reaction .....                                  | S11 |
| 3 Mechanistic investigations .....                             | S11 |
| (1) Considerations of the reaction's active intermediate ..... | S11 |
| (2) Cyclic Voltammetry analysis .....                          | S12 |
| (3) Quantum Yield Measurement .....                            | S15 |
| 4 References .....                                             | S16 |
| 5 Copies of NMR spectra .....                                  | S16 |

## 1 General information

All reagents and solvents were purchased from commercial suppliers, and the reactions were carried out under a nitrogen atmosphere.  $^1\text{H-NMR}$ ,  $^{13}\text{C-NMR}$ , and  $^{19}\text{F-NMR}$  spectra were recorded with a Bruker (400 MHz), Varian Inova (400 MHz) or Agilent (400 MHz) spectrometer. All chemical shifts ( $\delta$ ) are quoted in parts per million (ppm) and  $\text{CDCl}_3$  (77.16 ppm for  $^{13}\text{C}$  and 7.260 ppm for  $^1\text{H}$ ) was the test solvent unless otherwise noted. The abbreviations were used for an explanation of multiplicities: s = singlet, d = doublet, t = triplet, q = quartet, and m = multiplet. Blue LED lamps (40W, Kessil A160WE tuna blue) were used for reactions. Cyclic voltammetry were obtained from Shanghai Chen Hua CHI660. Photolysis experiments were performed on FZ-A Photolysis Spectrometer.

## 2 Experimental Details

### (1) Optimization of the reaction conditions

#### Copper salt Screen

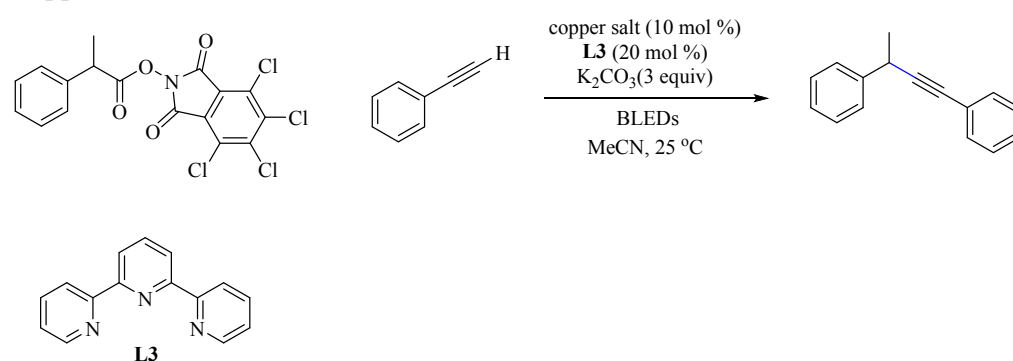

#### Copper Salt Screen

| Entry | Copper salt                                           | Yield (%) <sup>a</sup> |
|-------|-------------------------------------------------------|------------------------|
| 1     | $\text{CuCl}$                                         | 53                     |
| 2     | $\text{CuBr}$                                         | 50                     |
| 3     | $\text{Cu}(\text{MeCN})_4\text{PF}_6$                 | 38                     |
| 4     | $\text{CuCN}$                                         | 40                     |
| 5     | $\text{Cu}(\text{ClO}_4)_2 \cdot 6\text{H}_2\text{O}$ | 49                     |
| 6     | $\text{CuOAc}$                                        | 34                     |
| 7     | $\text{Cu}(\text{OTf})_2$                             | 32                     |

<sup>a</sup>Yields determined by  $^1\text{H-NMR}$  analysis.

NR: no reaction

#### Base Screen

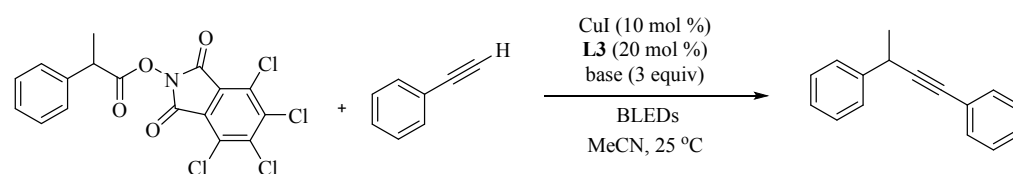

| Entry | Base | Yield (%) <sup>a</sup> |
|-------|------|------------------------|
|-------|------|------------------------|

|   |                                  |       |
|---|----------------------------------|-------|
| 1 | Li <sub>2</sub> CO <sub>3</sub>  | 13    |
| 2 | Na <sub>2</sub> CO <sub>3</sub>  | 21    |
| 3 | K <sub>2</sub> CO <sub>3</sub>   | 81    |
| 4 | Cs <sub>2</sub> CO <sub>3</sub>  | 34    |
| 5 | K <sub>3</sub> PO <sub>4</sub>   | 46    |
| 6 | Na <sub>2</sub> HPO <sub>4</sub> | 5     |
| 7 | Et <sub>3</sub> N                | NR    |
| 8 | LiOtBu                           | trace |
| 9 | KOtBu                            | trace |

<sup>a</sup>Yields determined by <sup>1</sup>HNMR analysis.

NR: no reaction

### Solvent Screen

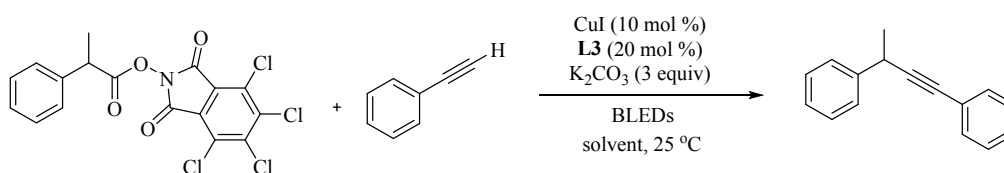

| Entry | Solvent                | Yield (%) <sup>a</sup> |
|-------|------------------------|------------------------|
| 1     | THF                    | 10                     |
| 2     | DCE                    | 30                     |
| 3     | DMF                    | 48                     |
| 4     | iPrOH                  | NR                     |
| 5     | DMSO                   | NR                     |
| 6     | MeCN:MeOH<br>(V:V=3:1) | 37                     |

<sup>a</sup>Yields determined by <sup>1</sup>HNMR analysis.

NR: no reaction

## (2) Reaction setup

Fig. S1 shows the emission spectra of the light. The vials are borosilicate glass and composed of a 3.0 cm long and 1.0 cm wide. It was placed 5cm away from blue LED lamps, and then place a fan blowing down on the vials. The strength of the air flow is adjusted so that the reaction temperature of the vials never exceeded 25 °C (Fig. 2).

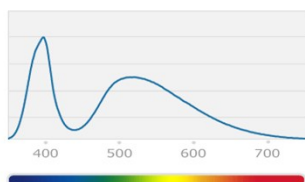

Fig. 1 Emission spectra<sup>1</sup>

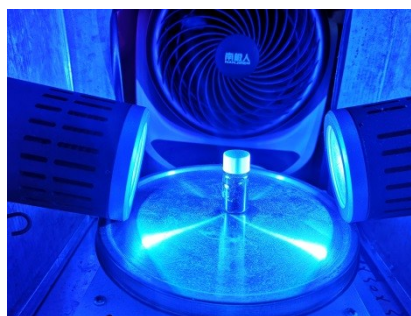

Fig. 2 Reaction chamber

## (3) General procedure and characterizations of products

### General procedure for decarboxylative alkylation

General procedure: Under nitrogen atmosphere, 2, 2', 6', 2''-terpyridine (0.04 mmol, 20 mol %), CuI (0.02 mmol, 10 mol %), K<sub>2</sub>CO<sub>3</sub> (0.6 mmol, 3.0 equiv), alkyne (0.2 mmol, 1 equiv), and N-acyloxyl derivatives (0.4 mmol, 2.0 equiv) were added in a dried reaction vessel with 2 mL of MeCN. The reaction mixture was stirred at room temperature under Blue LED for 24h. After completion, the reaction was quenched and the suspension was filtered by CH<sub>2</sub>Cl<sub>2</sub> over a pad of silica gel. The volatile solvent was evaporated in vacuum. The crude product was purified by column chromatography.

Note: The electron deficient tetrachloro derivative proved to be unstable<sup>2</sup>, carboxylic acids at activated position compounds **a2-a8** were N-hydroxyphthalimide esters. Others substrates are TCNHPI esters

*4,5,6,7-tetrachloro-1,3-dioxoisindolin-2-yl 2-phenylpropanoate a1*

According to the published procedures<sup>3</sup>, **a1** was obtained from 2-phenylpropionic acid (1.50g, 10mmol) as a white solid (3.4g, 79%). <sup>1</sup>H NMR (400 MHz, CDCl<sub>3</sub>): δ 7.42-7.38 (m, 4H), 7.35-7.31 (m, 1H), 4.12 (q, *J*=7.1Hz, 1H), 1.67 (d, *J* = 7.2 Hz, 3H). <sup>13</sup>C NMR (101 MHz, CDCl<sub>3</sub>): δ 170.4, 141.1, 138.0, 130.5, 129.1, 128.1, 127.6, 124.8, 43.0, 19.0 HRMS(ESI): C<sub>17</sub>H<sub>10</sub>Cl<sub>4</sub>NO<sub>4</sub>, calcd [M+H]<sup>+</sup>: 431.9283 found:431.9288

*1,3-dioxoisindolin-2-yl 2-(2-bromophenyl)acetate a4*

According to the published procedures<sup>3</sup>, **a4** was obtained from 2-bromophenylacetic acid (1.08g, 5mmol) as a white solid (1.48g, 82%). <sup>1</sup>H NMR (400 MHz, CDCl<sub>3</sub>): δ 7.90-7.86(m, 2H), 7.80-7.76 (m, 2H), 7.61(dd, *J* = 8.0, 0.8 Hz, 1H), 7.44 (dd, *J* = 7.6, 1.2 Hz, 1H), 7.33 (td, *J* = 7.6, 1.2 Hz, 1H), 7.19 (dd, *J* = 7.6, 1.6 Hz, 1H), 4.16 (s, 2H); <sup>13</sup>C NMR (101 MHz, CDCl<sub>3</sub>): 167.0, 161.9, 134.9, 133.1, 132.0, 131.4, 129.7, 129.0, 127.9, 125.1, 124.1, 38.5 HRMS(ESI): C<sub>16</sub>H<sub>11</sub>BrNO<sub>4</sub>, calcd [M+H]<sup>+</sup>: 359.9795 found: 359.9789

*1,3-dioxoisindolin-2-yl 2-(4-(trifluoromethyl)phenyl)acetate a5*

According to the published procedures<sup>3</sup>, **a5** was obtained from 2-(4-(trifluoromethyl)phenyl)acetic acid (1.02g, 5mmol) as a white solid (1.31g, 75%). <sup>1</sup>H NMR (400 MHz, CDCl<sub>3</sub>): δ 7.87-7.84 (m, 2H), 7.78-7.75 (m, 2H), 7.63 (d, *J* = 8.0 Hz, 2H), 7.51 (d, *J* = 8.0 Hz, 2H), 4.05 (s, 2H). <sup>19</sup>F NMR (376 MHz, CDCl<sub>3</sub>): -62.6 (s, 1F); <sup>13</sup>C NMR (101 MHz, CDCl<sub>3</sub>): 167.2, 161.8, 135.6 (q, *J* = 1.2 Hz), 135.0, 129.8, 129.7 (q, *J* = 32.7 Hz), 128.8, 125.9 (q, *J* = 3.8 Hz), 124.11, 124.08 (q, *J* = 273.2 Hz), 37.5 HRMS(ESI): C<sub>17</sub>H<sub>11</sub>F<sub>3</sub>NO<sub>4</sub>, calcd [M+H]<sup>+</sup>: 350.0565 found: 350.05659

*1,3-dioxoisindolin-2-yl 2-methyl-2-phenylpropanoate a7*

According to the published procedures<sup>3</sup>, **a7** was obtained from 2-methyl-2-phenylpropanoic acid (0.82g, 5mmol) as a white solid (0.57g, 37%). <sup>1</sup>H NMR (400 MHz, CDCl<sub>3</sub>): δ 7.87-7.85 (m, 2H), 7.79-7.76 (m, 2H), 7.51-7.50 (m, 2H), 7.44-7.41 (m, 2H), 7.34-7.30 (m, 1H), 1.79 (s, 6H); <sup>13</sup>C NMR (101 MHz, CDCl<sub>3</sub>): 173.3, 162.0, 142.7, 134.8, 129.0, 128.8, 127.5, 125.9, 123.9, 46.4, 26.9. HRMS(ESI): C<sub>18</sub>H<sub>16</sub>NO<sub>4</sub>, calcd [M+H]<sup>+</sup>: 310.1005 found: 310.1001

*1,3-dioxoisindolin-2-yl 1-(p-tolyl)cyclopropane-1-carboxylate a8*

According to the published procedures<sup>3</sup>, **a8** was obtained from 1-(p-tolyl)cyclopropane-1-carboxylic acid (0.88g, 5mmol) as a white solid (0.63g, 39%). <sup>1</sup>H NMR (400 MHz, CDCl<sub>3</sub>): δ 7.86-7.82 (m, 2H), 7.77-7.73 (m, 2H), 7.43-7.41 (m, 2H), 7.19-7.17 (m, 2H), 2.35 (s, 2H), 1.89 (q, *J* = 3.9 Hz, 2H), 1.47 (q, *J* = 3.9 Hz, 2H); <sup>13</sup>C NMR (101 MHz,

CDCl<sub>3</sub>): 171.3, 162.0, 137.8, 134.7, 134.1, 130.5, 129.3, 129.0, 123.9, 27.0, 21.3, 18.9  
HRMS(ESI): C<sub>19</sub>H<sub>15</sub>NO<sub>4</sub>Na, calcd [M+Na]<sup>+</sup>: 344.1000 found: 344.1004

**4,5,6,7-tetrachloro-1,3-dioxoisindolin-2-yl 3-cyclohexylpropanoate a10**

According to the published procedures<sup>3</sup>, **a10** was obtained from cyclohexanepropionic acid (0.78g, 5mmol) as a white solid (1.67g, 76%). <sup>1</sup>H NMR (400 MHz, CDCl<sub>3</sub>): δ 2.67-2.63 (m, 2H), 1.75-1.63 (m, 7H), 1.39-1.09 (m, 4H), 0.97-0.87 (m, 2H). <sup>13</sup>C NMR (101 MHz, CDCl<sub>3</sub>): δ 169.5, 157.6, 140.9, 130.4, 124.8, 37.0, 32.9, 32.0, 28.6, 26.5, 26.2 HRMS(ESI): C<sub>17</sub>H<sub>16</sub>Cl<sub>4</sub>NO<sub>4</sub>, calcd [M+H]<sup>+</sup>: 437.9751 found: 437.9747

**4,5,6,7-tetrachloro-1,3-dioxoisindolin-2-yl cyclobutanecarboxylate a13**

According to the published procedures<sup>3</sup>, **a13** was obtained from cyclobutanecarboxylic acid (0.50g, 5mmol) as a white solid (1.74g, 91%). <sup>1</sup>H NMR (400 MHz, CDCl<sub>3</sub>): δ 3.55-3.47 (m, 1H), 2.55-2.37 (m, 4H), 2.17-2.01 (m, 2H). <sup>13</sup>C NMR (101 MHz, CDCl<sub>3</sub>): δ 171.1, 157.8, 141.1, 130.6, 124.9, 35.0, 25.5, 18.9 HRMS(ESI): C<sub>13</sub>H<sub>8</sub>Cl<sub>4</sub>NO<sub>4</sub>, calcd [M+H]<sup>+</sup>: 381.9123 found: 381.9128

**4,5,6,7-tetrachloro-1,3-dioxoisindolin-2-yl 2-phenoxypropanoate a17**

According to the published procedures<sup>3</sup>, **a17** was obtained from 2-phenoxypropionic acid (0.83g, 5mmol) as a white solid (0.76g, 34%). <sup>1</sup>H NMR (400 MHz, CDCl<sub>3</sub>): δ 7.36-7.32 (m, 2H), 7.06-7.02 (m, 1H), 6.99-6.96 (m, 2H), 5.10 (q, *J*=6.8Hz, 1H), 1.86 (d, *J*=6.8Hz, 3H). <sup>13</sup>C NMR (101 MHz, CDCl<sub>3</sub>): δ 168.5, 157.0, 141.3, 130.7, 129.9, 124.7, 122.6, 115.2, 70.9, 19.1 HRMS(ESI): C<sub>17</sub>H<sub>10</sub>Cl<sub>4</sub>NO<sub>5</sub>, calcd [M+H]<sup>+</sup>: 447.9241 found: 447.9242

**4,5,6,7-tetrachloro-1,3-dioxoisindolin-2-yl 2-phenylacetate a18**

According to the published procedures<sup>3</sup>, **a18** was obtained from phenylacetic acid (0.68g, 5mmol) as a white solid (0.32g, 43%). <sup>1</sup>H NMR (400 MHz, CDCl<sub>3</sub>): δ 7.41-7.31 (m, 5H), 3.99 (s, 3H). <sup>13</sup>C NMR (101 MHz, CDCl<sub>3</sub>): δ 167.3, 157.5, 141.2, 131.3, 130.6, 129.4, 129.1, 128.1, 124.8, 37.8 HRMS(ESI): C<sub>16</sub>H<sub>8</sub>Cl<sub>4</sub>NO<sub>4</sub>, calcd [M+H]<sup>+</sup>: 417.9131 found: 417.9127

**but-1-yne-1,3-diyl dibenzene c1**

Following the general procedure, **c1** was obtained after flash column chromatography (PE) as colourless oil<sup>3</sup> (33.3mg, 81%). <sup>1</sup>H NMR (400 MHz, CDCl<sub>3</sub>): δ 7.50-7.46 (m, 3H), 7.40-7.36 (m, 2H), 7.34-7.28 (m, 4H), 4.02 (q, *J* = 7.1 Hz, 1H), 1.61 (d, *J* = 7.2 Hz, 3H). <sup>13</sup>C NMR (101 MHz, CDCl<sub>3</sub>): δ 143.5, 131.77, 128.7, 128.3, 127.9, 127.1, 126.8, 123.9, 92.7, 82.6, 32.6, 24.7 HRMS (EI<sup>+</sup>, 70eV): C<sub>16</sub>H<sub>14</sub> [M]<sup>+</sup>: calcd: 206.1096, found: 206.1100.

**4-(3-phenylprop-2-yn-1-yl)-1,1'-biphenyl c2**

Following the general procedure, **c2** was obtained after flash column chromatography (PE:EA=100:1) as colourless oil (38.1mg, 71%). <sup>1</sup>H NMR (400 MHz, CDCl<sub>3</sub>): δ 7.62-7.58 (m, 4H), 7.51-7.43 (m, 6H), 7.37-7.30 (m, 4H), 3.89 (s, 2H). <sup>13</sup>C NMR (101 MHz, CDCl<sub>3</sub>): δ 141.1, 139.8, 136.0, 131.8, 128.9, 128.5, 128.4, 128.0, 127.5, 127.3, 127.2, 123.8, 87.6, 82.9, 25.6 HRMS (EI<sup>+</sup>, 70eV): C<sub>21</sub>H<sub>16</sub> [M]<sup>+</sup>: calcd: 268.1252, found: 268.1242

**2-(3-phenylprop-2-yn-1-yl)naphthalene c3**

Following the general procedure, **c3** was obtained after flash column chromatography (petroleum ether) as colourless oil<sup>4</sup> (35.8mg, 74%). <sup>1</sup>H NMR (400 MHz, CDCl<sub>3</sub>): δ 7.88

(s, 1H), 7.84-7.82 (m, 3H), 7.53-7.43(m, 5H), 7.33-7.31 (m, 3H), 4.00 (s, 2H). <sup>13</sup>C NMR (101 MHz, CDCl<sub>3</sub>): δ 134.4, 133.7, 132.5, 131.8, 128.4, 128.3, 128.0, 127.8, 126.7, 126.4, 126.3, 125.7, 123.8, 87.6, 83.0, 26.1 HRMS (EI<sup>+</sup>, 70eV): C<sub>21</sub>H<sub>16</sub> [M]<sup>+</sup>: calcd: 242.1096, found: 242.1100

*1-bromo-2-(3-phenylprop-2-yn-1-yl)benzene c4*

Following the general procedure, **c4** was obtained after flash column chromatography (petroleum ether) as colourless oil<sup>4</sup> (38.3mg, 71%). <sup>1</sup>H NMR (400 MHz, CDCl<sub>3</sub>): δ 7.70-7.69 (m, 1H), 7.59-7.56 (m, 1H), 7.49-7.46 (m, 2H), 7.35-7.31(m, 4H), 7.16-7.12 (m, 1H), 3.91 (s, 2H). <sup>13</sup>C NMR (101 MHz, CDCl<sub>3</sub>): δ 136.3, 132.7, 131.8, 129.9, 128.5, 128.4, 128.1, 127.8, 124.0, 123.6, 86.4, 83.8, 26.9 HRMS (EI<sup>+</sup>, 70eV): C<sub>15</sub>H<sub>11</sub>Br [M]<sup>+</sup>: calcd: 270.0044, found: 270.0041

*1-(3-phenylprop-2-yn-1-yl)-4-(trifluoromethyl)benzene c5*

Following the general procedure, **c5** was obtained after flash column chromatography (PE:EA=100:1) as colourless oil<sup>4</sup> (30.7, 59%). <sup>1</sup>H NMR (400 MHz, CDCl<sub>3</sub>): δ 7.62-7.60 (m, 2H), 7.56-7.54 (m, 2H), 7.48-7.46 (m, 2H), 7.34-7.31 (m, 3H), 3.90 (m, 2H). <sup>13</sup>C NMR (101 MHz, CDCl<sub>3</sub>): δ 141.0, 131.8, 129.2 (q, *J*=32.5 Hz), 128.5, 128.2, 125.6 (q, *J*=3.8 Hz), 123.4, 86.4, 83.5, 25.8 <sup>19</sup>F-NMR (374 MHz, CDCl<sub>3</sub>): -62.37 (s, 3F). HRMS (EI<sup>+</sup>, 70eV): C<sub>16</sub>H<sub>11</sub>F<sub>3</sub> [M]<sup>+</sup>: calcd: 200.1565, found: 200.1573

*but-1-yne-1,4-diyl dibenzene c6*

Following the general procedure, **c6** was obtained after flash column chromatography (petroleum ether) as colourless oil<sup>5</sup> (21.4mg, 52%). <sup>1</sup>H NMR (400 MHz, CDCl<sub>3</sub>): δ 7.43-7.40 (m, 2H), 7.39-7.35 (m, 2H), 7.33-7.30(m, 4H), 7.28-7.26 (m, 2H), 2.98 (t, *J*=7.6Hz, 2H), 2.74 (t, *J*=7.4Hz, 2H). <sup>13</sup>C NMR (101 MHz, CDCl<sub>3</sub>): δ 140.8, 131.7, 128.7, 128.5, 128.3, 127.6, 126.4, 124.0, 89.6, 81.4, 35.3, 21.8 HRMS (EI<sup>+</sup>, 70eV): C<sub>16</sub>H<sub>14</sub> [M]<sup>+</sup>: calcd: 206.1096, found: 206.1097

*(4-cyclohexylbut-1-yn-1-yl)benzene c7*

Following the general procedure, **c7** was obtained after flash column chromatography (petroleum ether) as colourless oil<sup>6</sup> (27.6mg, 65%). <sup>1</sup>H NMR (400 MHz, CDCl<sub>3</sub>): δ 7.39-7.38 (m, 2H), 7.28-7.25 (m, 3H), 2.43-2.38 (m, 2H), 1.77-1.64 (m, 5H), 1.56-1.47 (m, 2H), 1.43-1.36(m, 1H), 1.28-1.16 (m, 3H), 0.95-0.87 (m, 2H). <sup>13</sup>C NMR (101 MHz, CDCl<sub>3</sub>): δ 131.7, 128.3, 127.6, 124.3, 90.8, 80.5, 37.0, 36.4, 33.1, 26.8, 26.4, 17.0 HRMS (EI<sup>+</sup>, 70eV): C<sub>16</sub>H<sub>20</sub> [M]<sup>+</sup>: calcd: 212.1565, found: 212.1569

*(4-cyclopentylbut-1-yn-1-yl)benzene c8*

Following the general procedure, **c8** was obtained after flash column chromatography (petroleum ether) as colourless oil (23.3, 59%). <sup>1</sup>H NMR (400 MHz, CDCl<sub>3</sub>): δ 7.40-7.38 (m, 2H), 7.30-7.26 (m, 3H), 2.41 (t, *J*=7.4Hz, 2H), 1.99-1.89 (m, 1H), 1.85-1.77 (m, 2H), 1.65-1.58 (m, 4H), 1.55-1.49 (m, 2H), 1.17-1.08 (m, 2H). <sup>13</sup>C NMR (101 MHz, CDCl<sub>3</sub>): δ 131.7, 128.3, 127.6, 124.2, 90.8, 80.5, 39.6, 35.3, 32.5, 25.3, 18.8 HRMS (EI<sup>+</sup>, 70eV): C<sub>15</sub>H<sub>18</sub> [M]<sup>+</sup>: calcd: 198.1409, found: 198.1400

*1-(phenylethynyl)adamantine c9*

Following the general procedure, **c9** was obtained after flash column chromatography (petroleum ether) as colourless oil (30.1mg, 0.57%). <sup>1</sup>H NMR (400 MHz, CDCl<sub>3</sub>): δ 7.42-7.40 (m, 2H), 7.31-7.26 (m, 3H), 2.16 (s, 2H), 2.00 (s, 3H), 1.74-1.64 (m, 12H). <sup>13</sup>C NMR (101 MHz, CDCl<sub>3</sub>): δ 131.7, 128.3, 127.5, 124.4, 88.0, 82.8, 42.3, 37.1, 34.8,

33.2, 28.8 HRMS (EI<sup>+</sup>, 70eV): C<sub>19</sub>H<sub>22</sub> [M]<sup>+</sup>: calcd: 250.1722, found: 250.1729

*(cyclobutylethynyl)benzene c10*

Following the general procedure, **c10** was obtained after flash column chromatography (petroleum ether) as colourless oil (20.0mg, 64%). <sup>1</sup>H NMR (400 MHz, CDCl<sub>3</sub>): δ 7.41-7.37 (m, 2H), 7.30-7.25 (m, 3H), 3.27-3.19 (m, 1H), 2.37-2.29 (m, 2H), 2.27-2.17 (m, 2H), 2.02-1.88 (m, 2H). <sup>13</sup>C NMR (101 MHz, CDCl<sub>3</sub>): δ 131.7, 128.3, 127.6, 124.1, 94.1, 81.3, 30.2, 25.7, 19.4 HRMS (EI<sup>+</sup>, 70eV): C<sub>12</sub>H<sub>12</sub> [M]<sup>+</sup>: calcd: 156.0939, found: 156.0941

*(cyclopentylethynyl)benzene c11*

Following the general procedure, **c11** was obtained after flash column chromatography (petroleum ether) as colourless oil<sup>7</sup>(22.4mg, 66%). <sup>1</sup>H NMR (400 MHz, CDCl<sub>3</sub>): δ 7.43-7.40 (m, 2H), 7.33-7.27 (m, 3H), 2.89-2.82 (m, 1H), 2.06-1.99 (m, 2H), 1.83-1.69 (m, 4H), 1.68-1.61 (m, 2H). <sup>13</sup>C NMR (101 MHz, CDCl<sub>3</sub>): δ 141.0, 131.8, 129.2 (q, *J*=32.5 Hz), 128.5, 128.2, 125.6 (q, *J*=3.8 Hz), 123.4, 86.4, 83.5, 25.8 HRMS (EI<sup>+</sup>, 70eV): C<sub>13</sub>H<sub>14</sub> [M]<sup>+</sup>: calcd: 170.1096, found: 170.1094

*(cyclohexylethynyl)benzene c12*

Following the general procedure, **c12** was obtained after flash column chromatography (petroleum ether) as colourless oil<sup>5</sup>(23.6mg, 64%). <sup>1</sup>H NMR (400 MHz, CDCl<sub>3</sub>): δ 7.41-7.38 (m, 2H), 7.30-7.23 (m, 3H), 2.62-2.56(m, 1H), 1.90-1.86 (m, 2H), 1.78-1.73 (m, 2H), 1.58-1.51(m, 4H), 1.36-1.33 (m, 2H). <sup>13</sup>C NMR (101 MHz, CDCl<sub>3</sub>): δ 131.7, 128.3, 127.5, 124.3, 94.6, 80.6, 32.9, 29.8, 26.1, 25.1 HRMS (EI<sup>+</sup>, 70eV): C<sub>14</sub>H<sub>16</sub> [M]<sup>+</sup>: calcd:184.1247, found: 184.1247

*(3-ethylhept-1-yn-1-yl)benzene c13*

Following the general procedure, **c13** was obtained after flash column chromatography (petroleum ether) as colourless oil (22.4mg, 60%). <sup>1</sup>H NMR (400 MHz, CDCl<sub>3</sub>): δ 7.41-7.38 (m, 2H), 7.30-7.24 (m, 3H), 2.50-2.43 (m, 1H), 1.62-1.51 (m, 5H), 1.46-1.32 (m, 3H), 1.06 (t, *J*= 7.4 Hz, 3H), 0.93 (t, *J*= 7.2 Hz, 3H). <sup>13</sup>C NMR (101 MHz, CDCl<sub>3</sub>): δ 131.7, 128.3, 127.5, 124.4, 93.9, 81.9, 34.7, 34.2, 29.9, 28.3, 22.8, 14.2, 12.0 HRMS (EI<sup>+</sup>, 70eV): C<sub>15</sub>H<sub>20</sub> [M]<sup>+</sup>: calcd: 200.1565, found: 200.1573

*(3-phenoxybut-1-yn-1-yl)benzene c14*

Following the general procedure, **c14** was obtained after flash column chromatography (PE:EA=50:1) as colourless oil<sup>8</sup>(30.6mg, 69%). <sup>1</sup>H NMR (400 MHz, CDCl<sub>3</sub>): δ 7.41-7.39 (m, 2H), 7.34-7.27 (m, 5H), 7.09-7.08 (m, 2H), 7.01-6.97 (m, 1H), 5.10 (q, *J*= 6.5 Hz, 1H), 1.75 (d, *J*= 6.4 Hz, 2H). <sup>13</sup>C NMR (101 MHz, CDCl<sub>3</sub>): δ 157.7, 131.9, 129.5, 128.6, 128.4, 122.6, 121.4, 116.0, 88.5, 85.8, 64.4, 22.5. HRMS (EI<sup>+</sup>, 70eV): C<sub>16</sub>H<sub>14</sub>O [M]<sup>+</sup>: calcd: 222.1045, found: 222.1047

*4-methoxy-4'-(4-phenylbut-3-yn-2-yl)-1,1'-biphenyl c15*

Following the general procedure, **c15** was obtained after flash column chromatography (PE:EA=50:1) as colourless oil (40.0mg, 70%). <sup>1</sup>H NMR (400 MHz, CDCl<sub>3</sub>): δ 7.81 (s, 1H), 7.74-7.72 (m, 2H), 7.55-7.53 (m, 1H), 7.48-7.46 (m, 2H), 7.32-7.29 (m, 3H), 7.16-7.13 (m, 2H), 4.12 (q, *J*= 7.2Hz, 1H), 3.92 (s, 3H), 1.65 (d, *J*= 7.2Hz, 3H). <sup>13</sup>C NMR (101 MHz, CDCl<sub>3</sub>): δ 157.6, 138.6, 133.6, 131.8, 129.4, 129.1, 128.4, 127.9, 127.3, 126.2, 125.1, 123.9, 119.0, 105.8, 92.9, 82.7, 55.4, 32.6, 24.5 HRMS (EI<sup>+</sup>, 70eV): C<sub>21</sub>H<sub>18</sub>O [M]<sup>+</sup>: calcd: 286.1358, found: 286.1362

*4-(3-methyl-3-phenylbut-1-yn-1-yl)-1,1'-biphenyl c16*

Following the general procedure, **c16** was obtained after flash column chromatography (PE:EA=100:1) as colourless oil (45.0mg, 76%). <sup>1</sup>H NMR (400 MHz, CDCl<sub>3</sub>): δ 7.68-7.66 (m, 2H), 7.63-7.61 (m, 2H), 7.59-7.54 (m, 4H), 7.49-7.45 (m, 2H), 7.41-7.36 (m, 3H), 7.30-7.26 (m, 1H), 1.73 (s, 6H). <sup>13</sup>C NMR (101 MHz, CDCl<sub>3</sub>): δ 147.1, 140.64, 140.56, 132.2, 129.0, 128.4, 127.6, 127.1, 127.0, 126.6, 125.8, 122.9, 97.4, 82.0, 36.6, 31.9 HRMS (EI<sup>+</sup>, 70eV): C<sub>23</sub>H<sub>20</sub> [M]<sup>+</sup>: calcd: 296.1565, found: 296.1564

*4-((1-(p-tolyl)cyclopropyl)ethynyl)-1,1'-biphenyl c17*

Following the general procedure, **c17** was obtained after flash column chromatography (petroleum ether) as colourless oil (38.5mg, 83%). <sup>1</sup>H NMR (400 MHz, CDCl<sub>3</sub>): δ 7.61-7.59 (m, 2H), 7.55-7.50 (m, 4H), 7.47-7.43 (m, 2H), 7.38-7.31 (m, 3H), 7.15-7.13 (m, 2H), 2.35 (m, 3H), 1.56-1.54 (m, 2H), 1.35-1.33 (m, 2H). <sup>13</sup>C NMR (101 MHz, CDCl<sub>3</sub>): δ 140.6, 140.6, 139.0, 135.8, 132.2, 129.2, 129.0, 127.6, 127.1, 127.0, 125.8, 122.9, 95.0, 78.1, 21.1, 20.4, 16.2 HRMS (EI<sup>+</sup>, 70eV): C<sub>24</sub>H<sub>20</sub> [M]<sup>+</sup>: calcd: 308.1565, found: 308.1570

*1-chloro-2-(3-phenylbut-1-yn-1-yl)benzene c18*

Following the general procedure, **c18** was obtained after flash column chromatography (petroleum ether) as colourless oil (31.7mg, 66%). <sup>1</sup>H NMR (400 MHz, CDCl<sub>3</sub>): δ 7.51-7.46 (m, 3H), δ 7.41-7.34 (m, 3H), 7.28-7.17 (m, 3H), 4.05 (q, *J* = 7.07 Hz, 1H), 1.62 (d, *J* = 7.20 Hz, 3H). <sup>13</sup>C NMR (101 MHz, CDCl<sub>3</sub>): δ 143.1, 136.1, 133.4, 129.3, 128.9, 128.7, 127.1, 126.9, 126.5, 123.7, 98.2, 79.6, 32.9, 24.7 HRMS (EI<sup>+</sup>, 70eV): C<sub>13</sub>H<sub>16</sub>Cl [M]<sup>+</sup>: calcd: 240.0700, found: 240.0702

*1-methyl-3-(3-phenylbut-1-yn-1-yl)benzene c19*

Following the general procedure, **c19** was obtained after flash column chromatography (petroleum ether) as colourless oil<sup>4</sup> (35.6mg, 81%). <sup>1</sup>H NMR (400 MHz, CDCl<sub>3</sub>): δ 7.47-7.45 (m, 2H), 7.37-7.33 (m, 2H), 7.28-7.23 (m, 3H), 7.19 (t, *J* = 7.6 Hz, 1H), 7.11-7.09 (m, 1H), 3.98 (q, *J* = 7.1 Hz, 1H), 2.32 (s, 3H), 1.58 (d, *J* = 7.2 Hz, 3H). <sup>13</sup>C NMR (101 MHz, CDCl<sub>3</sub>): δ 143.5, 138.0, 132.4, 128.8 (d, *J* = 3.5 Hz), 128.7, 128.2, 127.1, 126.8, 123.7, 92.4, 82.7, 32.6, 24.7, 21.3 HRMS (EI<sup>+</sup>, 70eV): C<sub>17</sub>H<sub>16</sub> [M]<sup>+</sup>: calcd: 220.1247, found: 220.1246

*4-(3-phenylbut-1-yn-1-yl)-1,1'-biphenyl c20*

Following the general procedure, **c20** was obtained after flash column chromatography (petroleum ether) as colourless oil (44.6mg, 79%). <sup>1</sup>H NMR (400 MHz, CDCl<sub>3</sub>): δ 7.60-7.58 (m, 2H), 7.55-7.50 (m, 4H), 7.49-7.42 (m, 4H), 7.38-7.34 (m, 2H), 7.28-7.24 (m, 2H), 4.01 (q, *J* = 7.1 Hz, 1H), 1.60 (d, *J* = 7.2 Hz, 3H). <sup>13</sup>C NMR (101 MHz, CDCl<sub>3</sub>): δ 143.5, 140.6, 132.2, 129.0, 128.7, 127.7, 127.14, 127.09, 127.04, 126.8, 122.8, 93.5, 82.4, 32.7, 24.7 HRMS (EI<sup>+</sup>, 70eV): C<sub>17</sub>H<sub>16</sub> [M]<sup>+</sup>: calcd: 220.1247, found: 220.1246

*1-chloro-4-(3-phenylprop-1-yn-1-yl)benzene c21*

Following the general procedure, **c21** was obtained after flash column chromatography (petroleum ether) as colourless oil<sup>9</sup> (31.6mg, 70%). <sup>1</sup>H NMR (400 MHz, CDCl<sub>3</sub>): δ 7.43-7.35 (m, 6H), 7.30-7.28 (m, 3H), 3.84 (s, 2H). <sup>13</sup>C NMR (101 MHz, CDCl<sub>3</sub>): δ 136.6, 133.9, 133.0, 128.75, 128.70, 128.1, 126.9, 122.3, 88.8, 81.7, 25.9. HRMS (EI<sup>+</sup>, 70eV): C<sub>15</sub>H<sub>11</sub>Cl [M]<sup>+</sup>: calcd: 226.0549, found: 226.0546

*1-bromo-4-(3-phenylprop-1-yn-1-yl)benzene c22*



Following the general procedure, **c22** was obtained after flash column chromatography (petroleum ether) as colourless oil<sup>10</sup> (34.6mg, 64%). <sup>1</sup>H NMR (400 MHz, CDCl<sub>3</sub>): δ 7.43-7.35 (m, 6H), 7.30-7.28 (m, 3H), 3.84(s, 2H). <sup>13</sup>C NMR (101 MHz, CDCl<sub>3</sub>): δ 136.6, 133.2, 131.6, 128.7, 128.1, 126.9, 122.7, 122.1, 89.0, 81.7, 25.9 HRMS (EI<sup>+</sup>, 70eV): C<sub>15</sub>H<sub>11</sub>Br [M]<sup>+</sup>: calcd: 270.0044, found: 270.0042

**6-methoxy-1-(3-phenylbut-1-yn-1-yl) naphthalene c23**

Following the general procedure, **c23** was obtained after flash column chromatography (PE:EA=50:1) as colourless oil (48.0mg, 84%). <sup>1</sup>H NMR (400 MHz, CDCl<sub>3</sub>): δ 7.89(s, 1H), 7.67 (t, *J*=8.6Hz, 2H), 7.51-7.46 (m, 3H), 7.39-7.35 (m, 2H), 7.28-7.24 (m, 1H), 7.16-7.10 (m, 2H), 4.03(q, *J*=7.1Hz, 1H), 1.62 (d, *J*=7.2Hz, 3H). <sup>13</sup>C NMR (101 MHz, CDCl<sub>3</sub>): δ 158.2, 143.6, 134.0, 131.2, 129.4, 129.3, 128.7, 128.6, 127.1, 126.801, 126.785, 119.4, 118.8, 105.9, 92.3, 82.9, 55.5, 32.7, 24.7 HRMS (EI<sup>+</sup>, 70eV): C<sub>22</sub>H<sub>18</sub>O [M]<sup>+</sup>: calcd: 286.1352, found: 286.1361

**4-(3-([1,1'-biphenyl]-4-yl)prop-1-yn-1-yl)benzotrile c24**

Following the general procedure, **c24** was obtained after flash column chromatography (PE:EA=30:1) as colourless oil (20.5mg, 35%). <sup>1</sup>H NMR (400 MHz, CDCl<sub>3</sub>): δ 7.61-7.56 (m, 6H), 7.54-7.52 (m, 2H), 7.47-7.40 (m, 5H), 7.37-7.33 (m, 1H), 3.90 (s, 2H). <sup>13</sup>C NMR (101 MHz, CDCl<sub>3</sub>): δ 140.9, 140.1, 135.1, 132.4, 132.1, 129.0, 128.8, 128.5, 127.6, 127.5, 127.2, 118.7, 111.4, 92.7, 81.5, 25.7. HRMS (EI<sup>+</sup>, 70eV): C<sub>22</sub>H<sub>15</sub>N [M]<sup>+</sup>: calcd: 239.1204 found: 239.1209

**4-(3-(4-(tert-butyl)phenyl)prop-2-yn-1-yl)-1,1'-biphenyl c25**

Following the general procedure, **c25** was obtained after flash column chromatography (petroleum ether) as colourless oil(53.8mg, 83%). <sup>1</sup>H NMR (400 MHz, CDCl<sub>3</sub>): δ 7.61-7.56 (m, 4H), 7.50-7.40 (m, 6H), 7.37-7.32 (m, 3H), 3.88 (s, 2H), 1.32 (s, 9H). <sup>13</sup>C NMR (101 MHz, CDCl<sub>3</sub>): δ 151.2, 141.1, 139.8, 136.2, 131.5, 128.9, 128.5, 127.4, 127.3, 127.2, 125.4, 120.7, 86.8, 82.9, 34.9, 31.3, 25.6 HRMS (EI<sup>+</sup>, 70eV): C<sub>25</sub>H<sub>24</sub> [M]<sup>+</sup>: calcd: 324.1878, found: 324.1800

**2-(3-phenylbut-1-yn-1-yl)thiophene c26**

Following the general procedure, **c26** was obtained after flash column chromatography (PE:EA=40:1) as colourless oil<sup>11</sup> (27.3mg, 88%). <sup>1</sup>H NMR (400 MHz, CDCl<sub>3</sub>): δ 7.44-7.42 (m, 2H), 7.37-7.33 (m, 2H), 7.27-7.24 (m, 1H), 7.21-7.17 (m, 2H), 6.97-6.94 (m, 1H), 4.09 (q, *J* = 7.1Hz, 1H), 1.58 (d, *J* = 7.2Hz, 3H). <sup>13</sup>C NMR (101 MHz, CDCl<sub>3</sub>): δ 143.1, 131.4, 128.7, 127.1, 126.95, 126.90, 126.4, 123.9, 96.6, 75.6, 32.9, 24.4 HRMS (EI<sup>+</sup>, 70eV): C<sub>14</sub>H<sub>12</sub>S [M]<sup>+</sup>: calcd: 212.0660, found: 212.0665

**3-(3-phenylbut-1-yn-1-yl)pyridine c27**

Following the general procedure, **c27** was obtained after flash column chromatography (PE:EA=20:1) as colourless oil<sup>12</sup>(29.8mg, 72%). <sup>1</sup>H NMR (400 MHz, CDCl<sub>3</sub>): δ 8.57-8.56 (m, 2H), 7.62 (td, *J* = 7.6, 1.6Hz, 1H), 7.47-7.40 (m, 3H), 7.36-7.33 (m, 2H), 7.27-7.18 (m, 2H), 4.02 (q, *J* = 7.1Hz, 1H), 1.62 (d, *J* = 7.2Hz, 3H). <sup>13</sup>C NMR (101 MHz, CDCl<sub>3</sub>): δ 150.0, 143.8, 142.7, 136.2, 128.8, 127.2, 127.1, 126.9, 122.6, 93.1, 82.1, 32.5, 24.2 HRMS (EI<sup>+</sup>, 70eV): C<sub>15</sub>H<sub>13</sub>N [M]<sup>+</sup>: calcd: 207.1048, found: 207.1039

**4-(3-(4-methoxyphenyl)prop-2-yn-1-yl)-1,1'-biphenyl c28**

Following the general procedure, **c28** was obtained after flash column chromatography (PE:EA=50:1) as colourless oil (46.5mg, 78%). <sup>1</sup>H NMR (400 MHz, CDCl<sub>3</sub>): δ 7.61-

7.55(m, 4H), 7.53-7.40 (m, 5H), 7.36-7.33 (m, 1H), 6.85-6.83 (m, 2H), 3.87 (s, 2H), 3.81(s, 3H). <sup>13</sup>C NMR (101 MHz, CDCl<sub>3</sub>): δ 159.4, 141.1, 139.8, 136.2, 133.2, 128.9, 128.5, 127.4, 127.3, 127.2, 115.9, 114.0, 86.0, 82.6, 55.4, 25.6 HRMS (EI<sup>+</sup>, 70eV): C<sub>22</sub>H<sub>18</sub>O [M]<sup>+</sup>: calcd: 298.1358, found: 298.1361.

*(3-([1,1'-biphenyl]-4-yl)prop-1-yn-1-yl)trimethylsilane c29*

Following the general procedure, **c29** was obtained after flash column chromatography (petroleum ether) as colourless oil (36.9mg, 70%). <sup>1</sup>H NMR (400 MHz, CDCl<sub>3</sub>): δ 7.60-7.55 (m, 4H), 7.46-7.41 (m, 4H), 7.36-7.33 (m, 1H), 3.70 (s, 1H), 0.21 (m, 9H). <sup>13</sup>C NMR (101 MHz, CDCl<sub>3</sub>): δ 141.0, 139.8, 135.6, 128.9, 128.4, 127.39, 127.33, 127.2, 104.3, 87.1, 26.0, 0.3 HRMS (EI<sup>+</sup>, 70eV): C<sub>18</sub>H<sub>20</sub>Si [M]<sup>+</sup>: calcd:263.1326, found: 263.1334

*(3-([1,1'-biphenyl]-4-yl)prop-1-yn-1-yl)triethylsilane c30*

Following the general procedure, **c30** was obtained after flash column chromatography (petroleum ether) as colourless oil (45.2mg, 74%). <sup>1</sup>H NMR (400 MHz, CDCl<sub>3</sub>): δ 7.62-7.57 (m, 4H), 7.47-7.43 (m, 4H), 7.37-7.33 (m, 1H), 3.75 (s, 1H), 1.05 (t, *J*= 8.0Hz, 9H), 0.66 (t, *J*= 7.9Hz, 6H). <sup>13</sup>C NMR (101 MHz, CDCl<sub>3</sub>): δ 141.0, 139.7, 135.8, 128.9, 128.4, 127.33, 127.30, 127.2, 105.3, 84.5, 26.0, 7.7, 4.7 HRMS (EI<sup>+</sup>, 70eV): C<sub>21</sub>H<sub>26</sub>Si [M]<sup>+</sup>: calcd:306.1809, found: 306.1804

*(3-([1,1'-biphenyl]-4-yl)prop-1-yn-1-yl)triisopropylsilane c31*

Following the general procedure, **c31** was obtained after flash column chromatography (petroleum ether) as colourless oil (52.2mg, 75%). <sup>1</sup>H NMR (400 MHz, CDCl<sub>3</sub>): δ 7.62-7.57 (m, 4H), 7.48-7.43 (m, 4H), 7.37-7.33 (m, 1H), 3.76 (s, 1H), 1.13-1.12 (m, 21H). <sup>13</sup>C NMR (101 MHz, CDCl<sub>3</sub>): δ 141.0, 139.6, 136.0, 128.9, 128.4, 127.3, 127.2, 105.7, 83.2, 26.1, 18.8, 11.5 HRMS (EI<sup>+</sup>, 70eV): C<sub>24</sub>H<sub>32</sub>Si [M]<sup>+</sup>: calcd:348.2273, found: 348.2280

*4-(5-methylhex-2-yn-1-yl)-1,1'-biphenyl c32*

Following the general procedure, **c32** was obtained after flash column chromatography (petroleum ether) as colourless oil (31.2mg, 63%). <sup>1</sup>H NMR (400 MHz, CDCl<sub>3</sub>): δ 7.60-7.54 (m, 4H), 7.46-7.42 (m, 4H), 7.36-7.32 (m, 1H), 3.64 (t, *J*=2.0 Hz, 1H), 2.16-2.13 (m, 2H), 1.89-1.79 (m, 1H), 1.01 (d, *J* = 6.4Hz, 6H). <sup>13</sup>C NMR (101 MHz, CDCl<sub>3</sub>): δ 141.1, 139.5, 136.9, 128.9, 128.4, 127.31, 127.26, 127.2, 81.8, 78.4, 28.4, 28.3, 25.0, 22.2 HRMS (EI<sup>+</sup>, 70eV): C<sub>19</sub>H<sub>20</sub> [M]<sup>+</sup>: calcd: 248.1565, found: 248.1564

*4-(hex-2-yn-1-yl)-1,1'-biphenyl c33*

Following the general procedure, **c33** was obtained after flash column chromatography (petroleum ether) as colourless oil (32.8mg, 70%). <sup>1</sup>H NMR (400 MHz, CDCl<sub>3</sub>): δ 7.61-7.55 (m, 4H), 7.47-7.43 (m, 4H), 7.37-7.33(m, 1H), 3.65 (t, *J*= 2.0Hz, 1H), 2.26-2.22 (m, 2H), 1.64-1.55 (m, 2H), 1.03 (t, *J*= 7.4Hz, 3H). <sup>13</sup>C NMR (101 MHz, CDCl<sub>3</sub>): δ 141.1, 139.5, 136.9, 128.9, 128.4, 127.31, 127.25, 127.2, 82.8, 77.7, 25.0, 22.6, 21.0, 13.7 HRMS (EI<sup>+</sup>, 70eV): C<sub>18</sub>H<sub>18</sub> [M]<sup>+</sup>: calcd:234.1409, found: 234.1414

*4-(hept-2-yn-1-yl)-1,1'-biphenyl c34*

Following the general procedure, **c34** was obtained after flash column chromatography (petroleum ether) as colourless oil (33.7mg, 68%). <sup>1</sup>H NMR (400 MHz, CDCl<sub>3</sub>): δ 7.60-7.54 (m, 4H), 7.46-7.42 (m, 4H), 7.36-7.32 (m, 1H), 3.63 (t, *J*= 2.0Hz, 1H), 2.28-2.23 (m, 2H), 1.58-1.43 (m, 4H), 0.94 (t, *J*= 7.2Hz, 3H). <sup>13</sup>C NMR (101 MHz, CDCl<sub>3</sub>):

$\delta$ 141.1, 139.6, 136.9, 128.8, 128.4, 127.32, 127.26, 127.2, 82.9, 77.5, 31.3, 25.0, 22.2, 18.7, 13.8 HRMS (EI<sup>+</sup>, 70eV): C<sub>19</sub>H<sub>20</sub> [M]<sup>+</sup>: calcd:248.1565, found: 248.1570

#### 4-(*oct-2-yn-1-yl*)-1,1'-biphenyl **c35**

Following the general procedure, **c35** was obtained after flash column chromatography (petroleum ether) as colourless oil (39.3mg, 75%). <sup>1</sup>H NMR (400 MHz, CDCl<sub>3</sub>):  $\delta$  7.60-7.54 (m, 4H), 7.45-7.41 (m, 4H), 7.35-7.32 (m, 1H), 3.63 (t, *J*=2.2 Hz, 1H), 2.26-2.21 (m, 2H), 1.59-1.52 (m, 2H), 1.44-1.34 (m, 4H), 0.91 (t, *J*= 7.0Hz, 3H). <sup>13</sup>C NMR (101 MHz, CDCl<sub>3</sub>):  $\delta$ 141.2, 139.6, 136.9, 128.9, 128.4, 127.32, 127.27, 127.2, 83.0, 77.6, 31.3, 28.9, 25.0, 22.4, 19.0, 14.2 HRMS (EI<sup>+</sup>, 70eV): C<sub>20</sub>H<sub>22</sub> [M]<sup>+</sup>: calcd: 262.1722, found: 262.1724

#### 4-(*pentadec-2-yn-1-yl*)-1,1'-biphenyl **c36**

Following the general procedure, **c36** was obtained after flash column chromatography (PE:EA=50:1) as colourless oil (53.3mg, 74%). <sup>1</sup>H NMR (400 MHz, CDCl<sub>3</sub>):  $\delta$  7.60-7.54 (m, 4H), 7.46-7.42 (m, 4H), 7.36-7.32(m, 1H), 3.63 (t, *J*= 2.0Hz, 1H), 2.26-2.22 (m, 2H), 1.58-1.51 (m, 2H), 1.43-1.38(m, 2H), 1.29-1.27 (m, 16H), 0.88 (t, *J*= 6.8Hz, 3H). <sup>13</sup>C NMR (101 MHz, CDCl<sub>3</sub>):  $\delta$ 141.1, 139.5, 136.9, 128.9, 128.4, 127.31, 127.26, 127.2, 83.0, 77.5, 32.1, 29.85, 29.81, 29.8, 29.7, 29.5, 29.3, 29.1, 25.0, 22.8, 19.0, 14.3 HRMS (EI<sup>+</sup>, 70eV): C<sub>27</sub>H<sub>36</sub> [M]<sup>+</sup>: calcd:360.2817, found: 360.2820

### (4) Gram-Scale Reaction

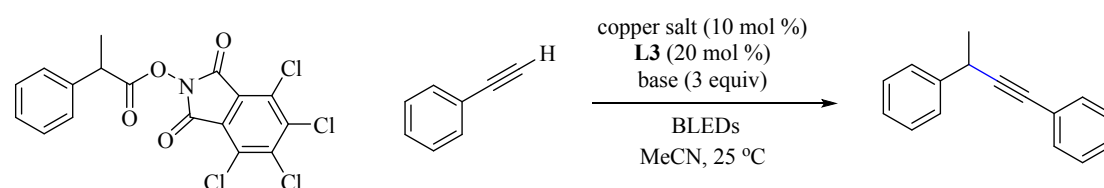

Under nitrogen atmosphere, 2, 2', 6', 2''-terpyridine (1.6 mmol, 20 mol %), CuI (0.8 mmol, 10 mol %), K<sub>2</sub>CO<sub>3</sub> (24 mmol, 3.0 equiv), alkyne (8.0 mmol, 1 equiv), and N-acyloxyl derivatives (16mmol, 2.0 equiv) were added in a dried reaction vessel with 30 mL of MeCN. After 48h, the reaction was quenched with ice water and extracted with DCM, then dried over anhydrous Na<sub>2</sub>SO<sub>4</sub> and concentrated. The crude product was purified by column chromatography. (1.2g, 73%)

### 3 Mechanistic Investigations

#### (1) Considerations of the reaction's active intermediate<sup>13</sup>

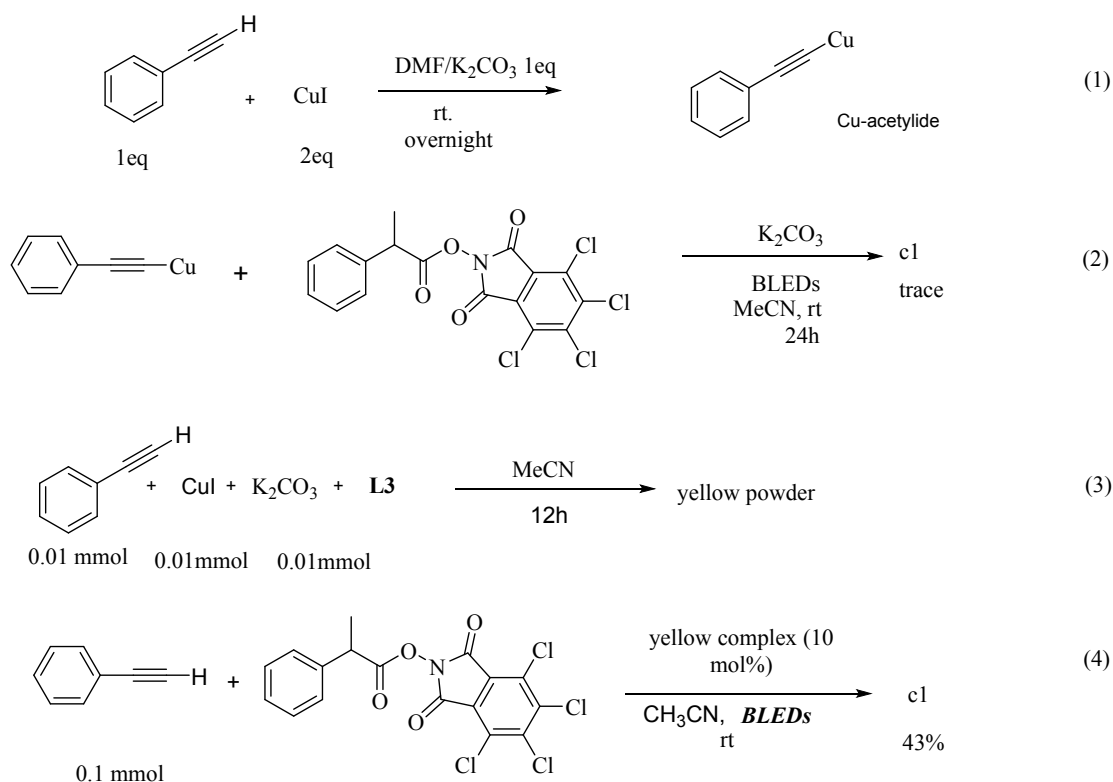

phenylethynylcopper was obtained according to literature (eq 1).

Control experiment (eq 2): under our standard conditions, stoichiometry (phenylethynyl)copper or catalytic amount (phenylethynyl)copper, ethynylbenzene (0 mmol or 0.09 mmol), **a1** (0.2 mmol, 2.0 equiv) and  $K_2CO_3$  (0.3 mmol, 3.0 equiv) were added sequentially for 24h. After completion, Trace product was obtained.

We prepared the Cu-tpy-alkyne complex and isolated it as a crude yellow powder (eq 3). The yellow complex as the catalyst catalyzed the reaction in 43% yield (eq 4). Thus, Cu-tpy-alkyne complex played a role of catalyst for this reaction.

## (2) Cyclic Voltammetry analysis<sup>13</sup>

Cyclic Voltammetry analysis was performed by Shanghai Chen Hua CHI660D. Pt electrode (area=0.03 cm<sup>2</sup>), and Pt sheet were working electrode and auxiliary electrode, respectively. A saturated calomel electrode (SCE) was reference electrode. Tetrabutylammonium hexafluorophosphate ( $nBu_4NPF_6$ ) was supporting electrolyte and electrolysis was conducted at room temperature. 0.1mol substrate was added in 0.1M solution of  $nBu_4NPF_6$  (10mL MeCN). The reduction potentials of selected TCNHPI esters of primary, secondary, tertiary and acids were exhibited. However, the reduction potential of ligand-Cu-acetylide complex in suite generated is difficult to test. Based on the report<sup>13</sup>, ligand-Cu-acetylide complex have higher reduction potential.

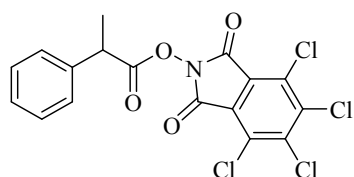

$$E_{1/2} = -0.79 \text{ V vs SCE}$$

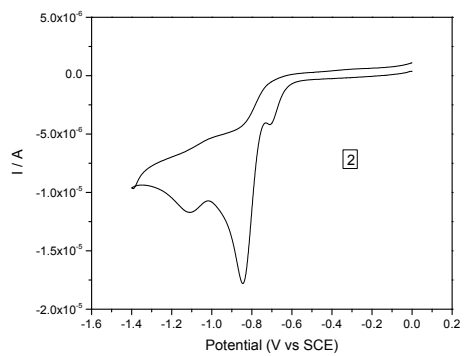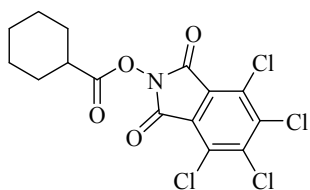

$$E_{1/2} = -0.73 \text{ V vs SCE}$$

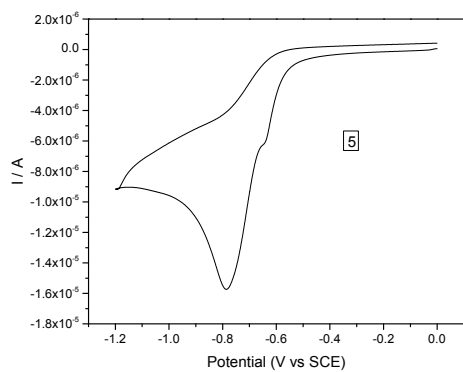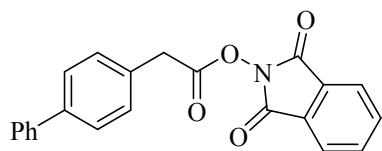

$$E_{1/2} = -0.77 \text{ V vs SCE}$$

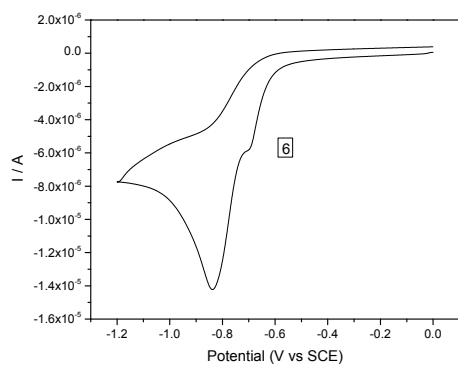

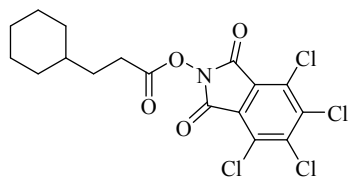

$$E_{1/2} = -0.79 \text{ V vs SCE}$$

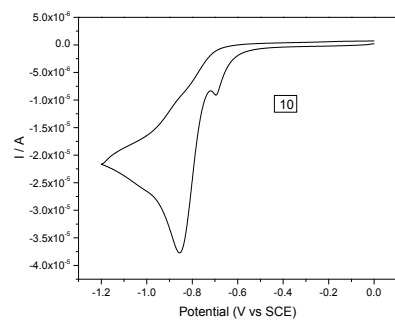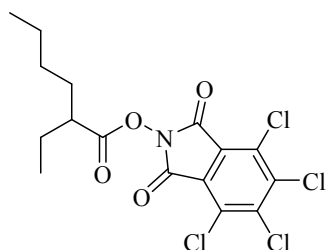

$$E_{1/2} = -0.78 \text{ V vs SCE}$$

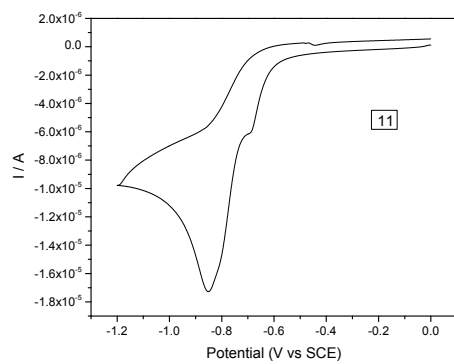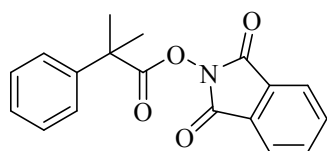

$$E_{1/2} = -0.80 \text{ V vs SCE}$$

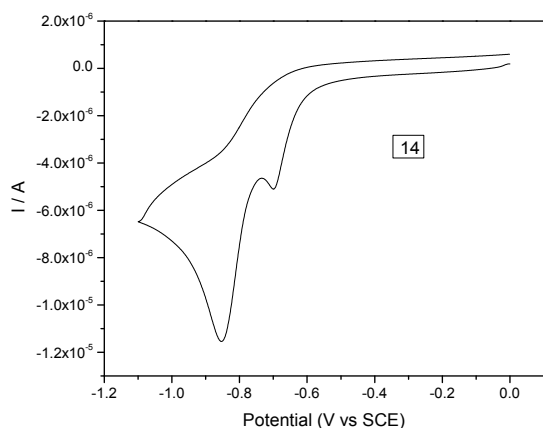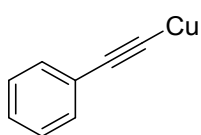

$E_{1/2} = -0.86 \text{ V vs SCE}$

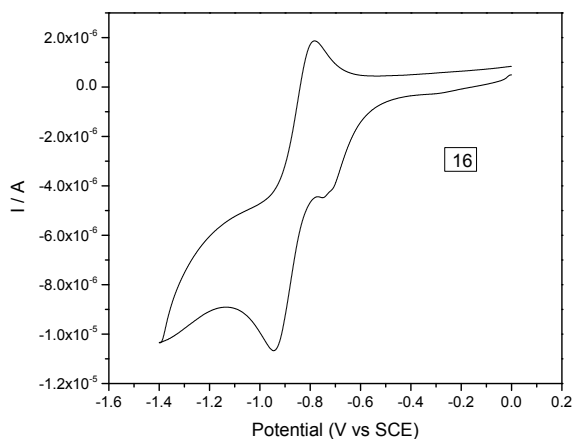

### (3) Quantum Yield Measurement<sup>14</sup>

The quantum yield measurement of the photoinduced reaction was performed based on our previous publication. The cuvette placed 5cm away from blue LED lamps and the incident area was  $1 \text{ cm}^2$ .

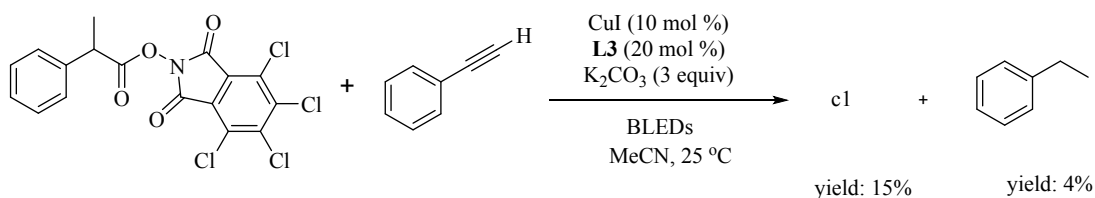

Prepared following the general procedure showed above and the reaction mixture was stirred under Blue LED for 30min. After completion, the reaction was quenched and the yield of crud product was determined by  $^1\text{H NMR}$ . Diethyl phthalate was internal standard.

The photon flux was 379 mW (average of three experiments).

$$\text{Photon flux} = \frac{P}{N_A \cdot hc / \lambda} = \frac{379.0 \times 10^{-3}}{6.02 \times 10^{23} \times 6.63 \times 10^{-34} \times 3 \times 10^8 / (400 \times 10^{-9})} = 1.3 \times 10^{-6} \text{ einstein} \cdot \text{s}^{-1} \quad (1)$$

QY calculated by the equation (2). T is the reaction time (30 × 60s). QY was Φ=0.8%.

$$\Phi = \frac{\text{mol product}}{\text{photon flux} \cdot t \cdot f} = \frac{1.9 \times 10^{-5}}{1.3 \times 10^{-6} \times 30 \times 60} = 0.8 \% \quad (2)$$

## 4 References

- [1] “ Kessil LED Light ” can be found under <https://www.marine-aquatics.eu/kessil-a160we-tuna-sun-sladvodni-led-osvetleni-40w?langid=4>
- [2] I. Bosque, T. Bach, 3- Acetoxyquinuclidine as Catalyst in Electron Donor-Acceptor Complex-Mediated Reactions Triggered by Visible Light *ACS. Catal.* **2019**, 9, 9103-9109.
- [3] Y. Li, J. Zhang, D. F. Li, Y. Y. Chen, Metal-Free C(sp<sup>3</sup>)-H Alkylation via Aryl Carboxyl Radicals Enabled by Donor-Acceptor Complex *Org.Lett.* **2018**, 20, 3296-3299.
- [4] H. R. Zhang, N. Sun, B. X. Hu, Z. L. Shen, X. Q. Hu, L. Q. Jin, Copper-catalyzed direct coupling of terminal alkynes with primary and secondary benzyl bromides *Org.Chem.Front.* **2019**, 6, 1983-1988.
- [5] L. Chen, Y. Kametanic, K. Imamura, T. Abe, Y. Shiota, K. Yoshizawa, Y. Hisaeda, H. Shimakoshi, Visible light-driven cross-coupling reactions of alkyl halides with phenylacetylene derivatives for C(sp<sup>3</sup>)-C(sp) bond formation catalyzed by B<sub>12</sub> complex *Chem.Commun.* **2019**, 55, 13070-13073.
- [6] K. Indukuri, O. Riant, Transmetalation of Alkylzirconocenes in Copper-Catalyzed Alkyl-Alkynyl Cross-Coupling Reactions *Adv.Synth.Catal.* **2017**, 359, 2425-2433.
- [7] M. Ociepa, J. Turkowska, D. Gryko, Redox-Activated Amines in C(sp<sup>3</sup>)-C(sp) and C(sp<sup>3</sup>)-C(sp<sup>2</sup>) Bond Formation Enabled by Metal-Free Photoredox Catalysis *ACS. Catal.* **2018**, 8, 11362-11367.
- [8] M. Wan, Z. L. Meng, H. X. Lou, L. Liu, Practical and Highly Selective C-H Functionalization of Structurally Diverse Ethers *Angew.Chem.Int.Ed.* **2014**, 53, 1-6.
- [9] W. W. Zhang, X. G. Zhang, J. H. Li, Palladium-Catalyzed Decarboxylative Coupling of Alkynyl Carboxylic Acids with Benzyl Halides or Aryl Halides *J.Org.Chem.* **2010**, 75, 5259-5264.
- [10] C. K. Li, J. B. Wang, Lewis Acid Catalyzed Propargylation of Arenes with O-Propargyl Trichloroacetimidates: Synthesis of 1,3-Diarylpropynes *J.Org.Chem.* **2007**, 72, 7431-7434.
- [11] M. Guisán-Ceinos, V. Martín-Heras, M. Tortosa, Stereospecific Copper-Catalyzed Substitution Reaction of Propargylic Ammonium Salts with Aryl Grignard Reagents *J.Am.Chem.Soc.* **2017**, 139, 8448-8451.
- [12] H. Fang, Z. Y. Yang, L. J. Zhang, W. Wang, Y. M. Li, X. L. Xu, S. L. Zhou, Transmetal-Catalyzed Enantioselective Cross-Coupling Reaction of Racemic Secondary Benzylic Bromides with Organoaluminum *Org.Lett.* **2016**, 18, 6022-6025.
- [13] See references 16a, 16b of manuscript
- [14] L. Zhang, L. Jiao, Visible-Light-Induced Organocatalytic Borylation of Aryl Chlorides *J.Am.Chem.Soc.* **2019**, 141, 9124-9128.

## 5 Copies of NMR Spectra



# 4,5,6,7-tetrachloro-1,3-dioxisoindolin-2-yl 2-phenylpropanoate **a1**

## <sup>1</sup>H-NMR

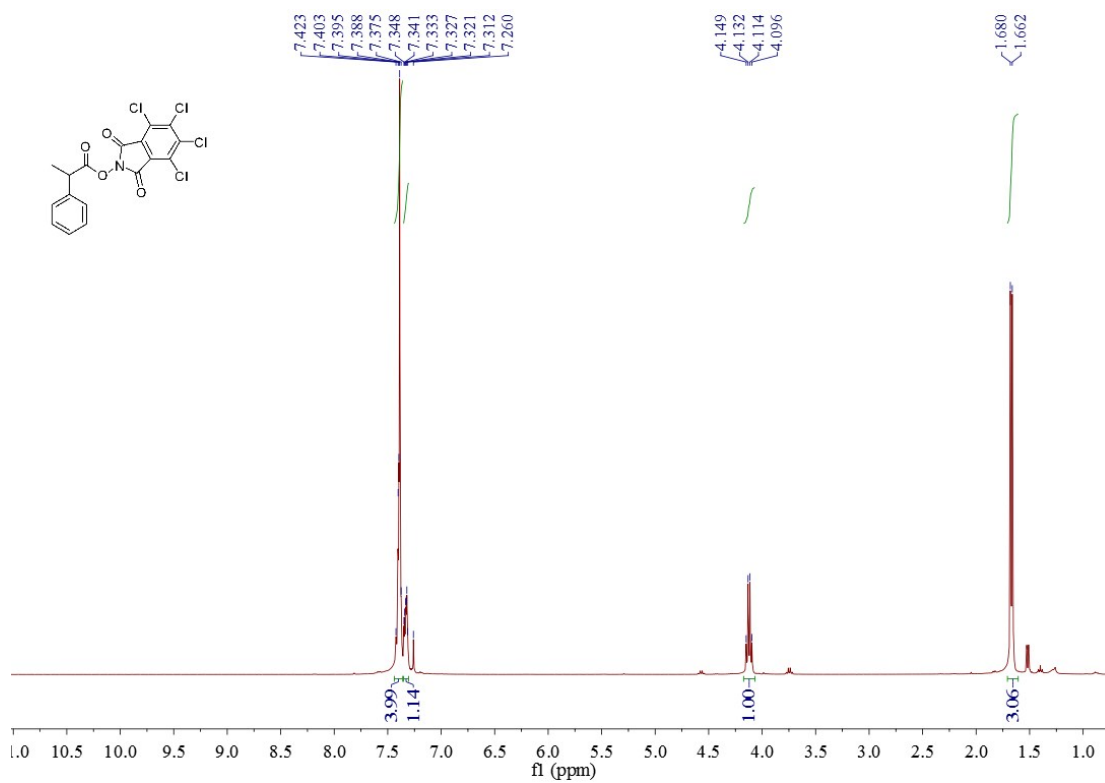

## <sup>13</sup>C-NMR

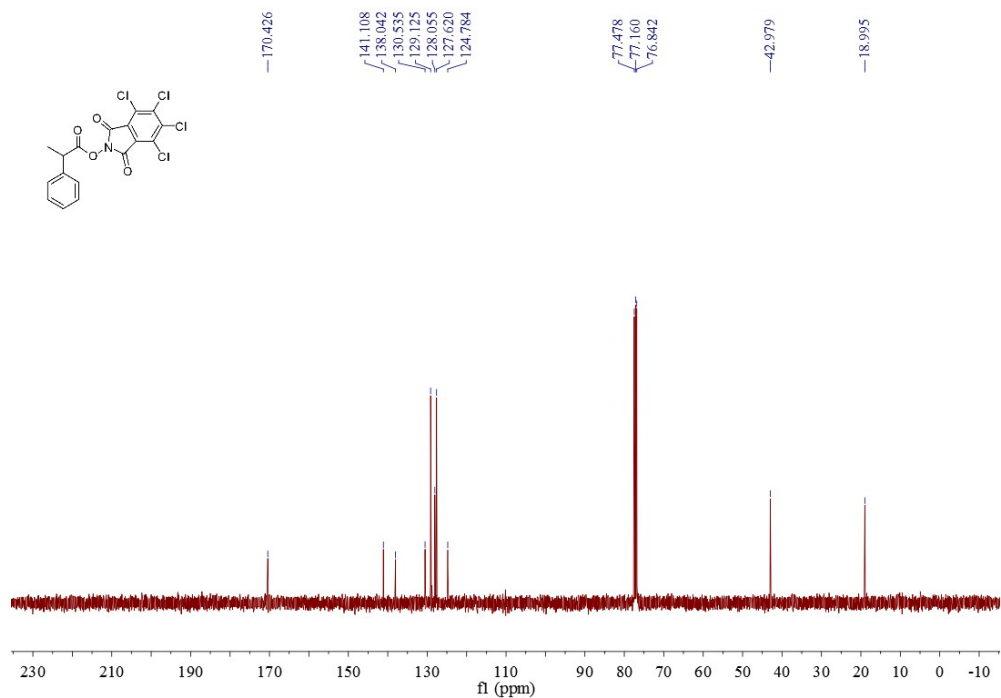

1,3-dioxoisindolin-2-yl 2-(2-bromophenyl)acetate **a4**

<sup>1</sup>H-NMR

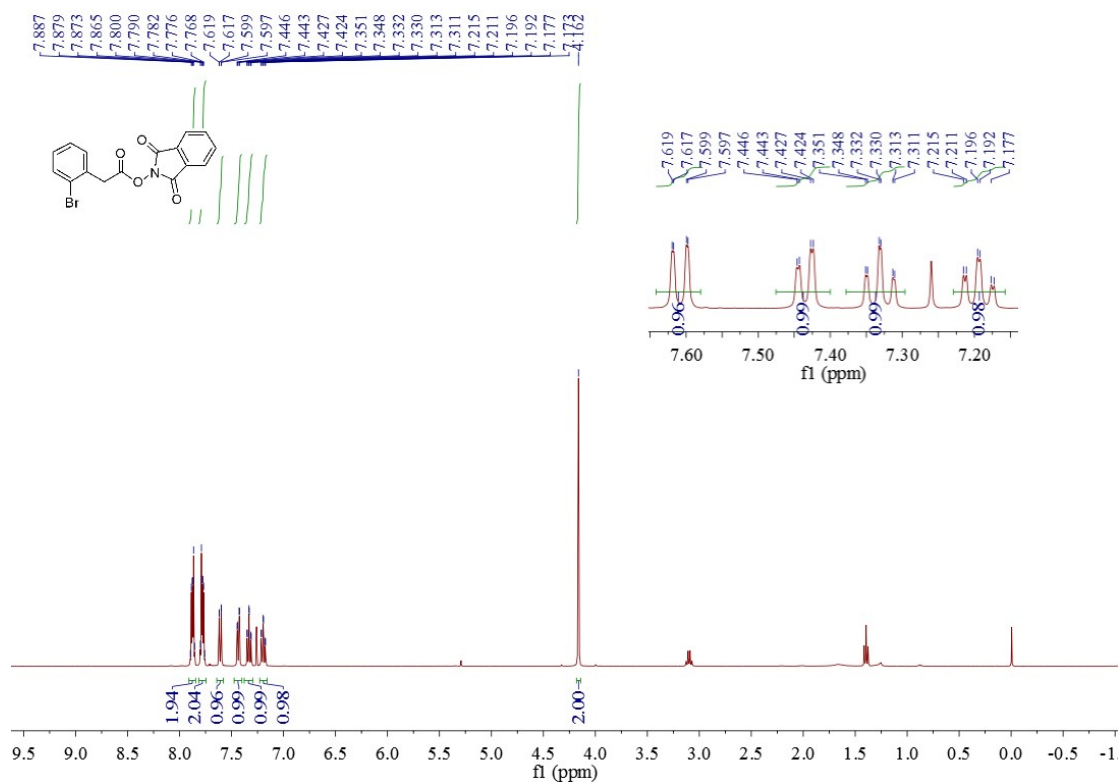

<sup>13</sup>C-NMR

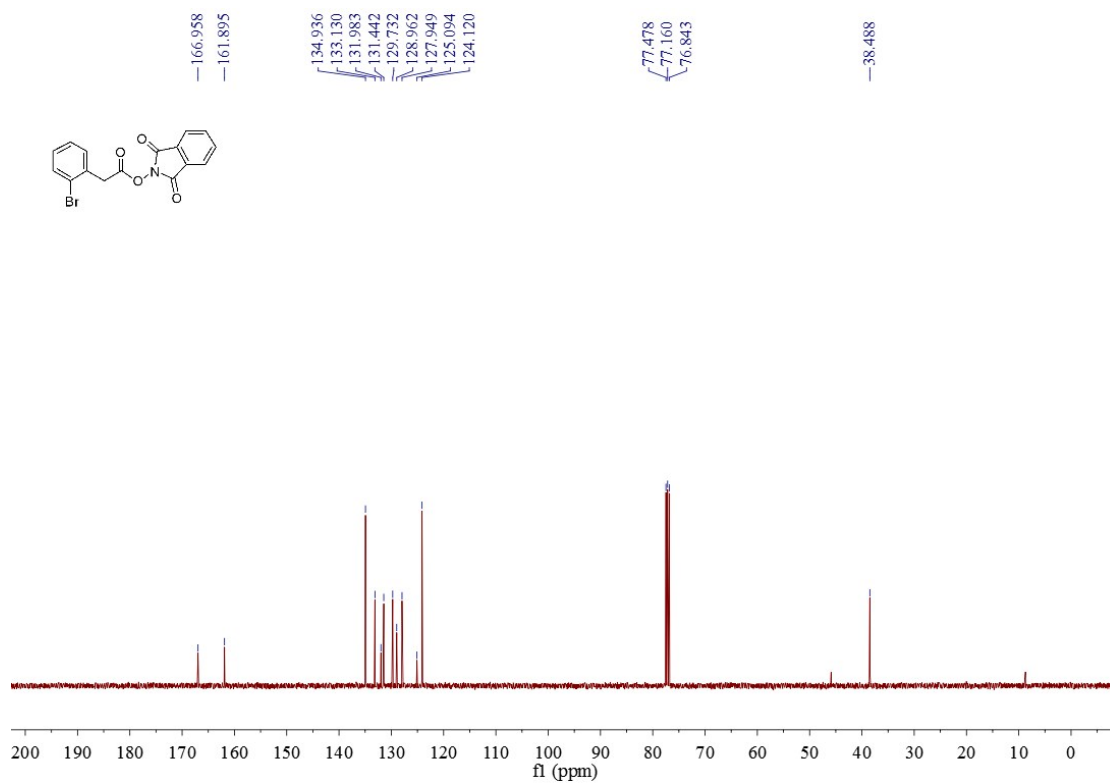

1,3-dioxisoindolin-2-yl 2-(4-(trifluoromethyl)phenyl)acetate **a5**

<sup>1</sup>H-NMR

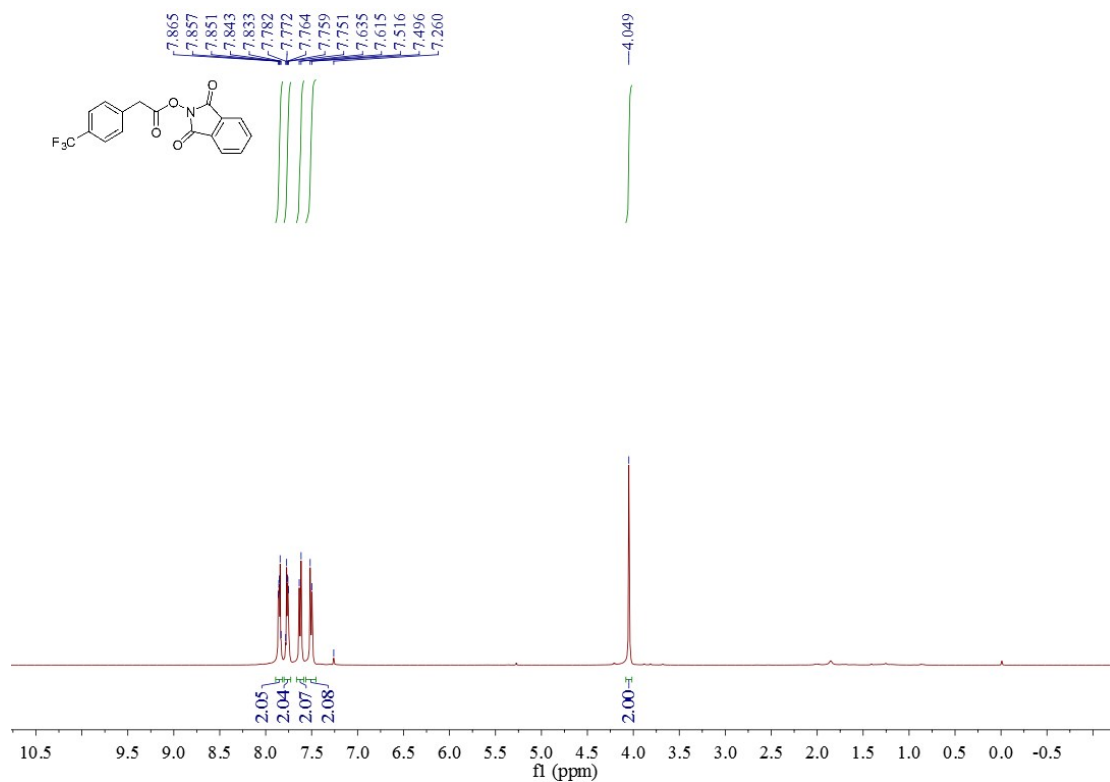

<sup>19</sup>F NMR

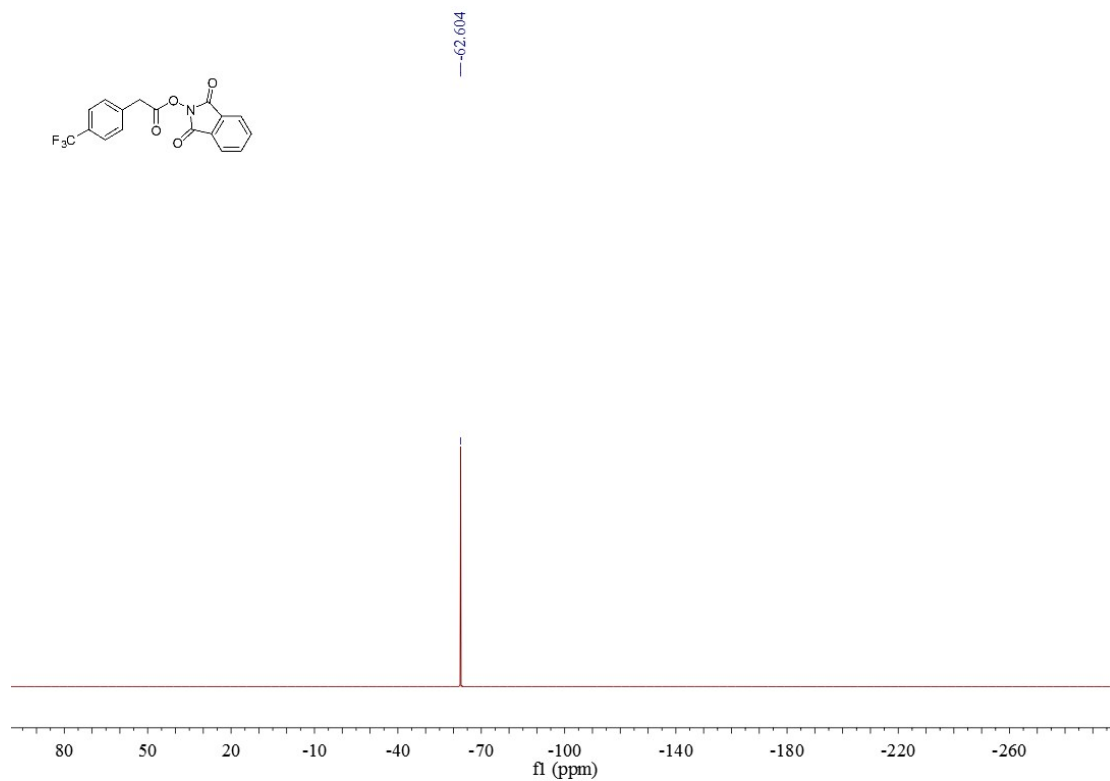

### <sup>13</sup>C-NMR

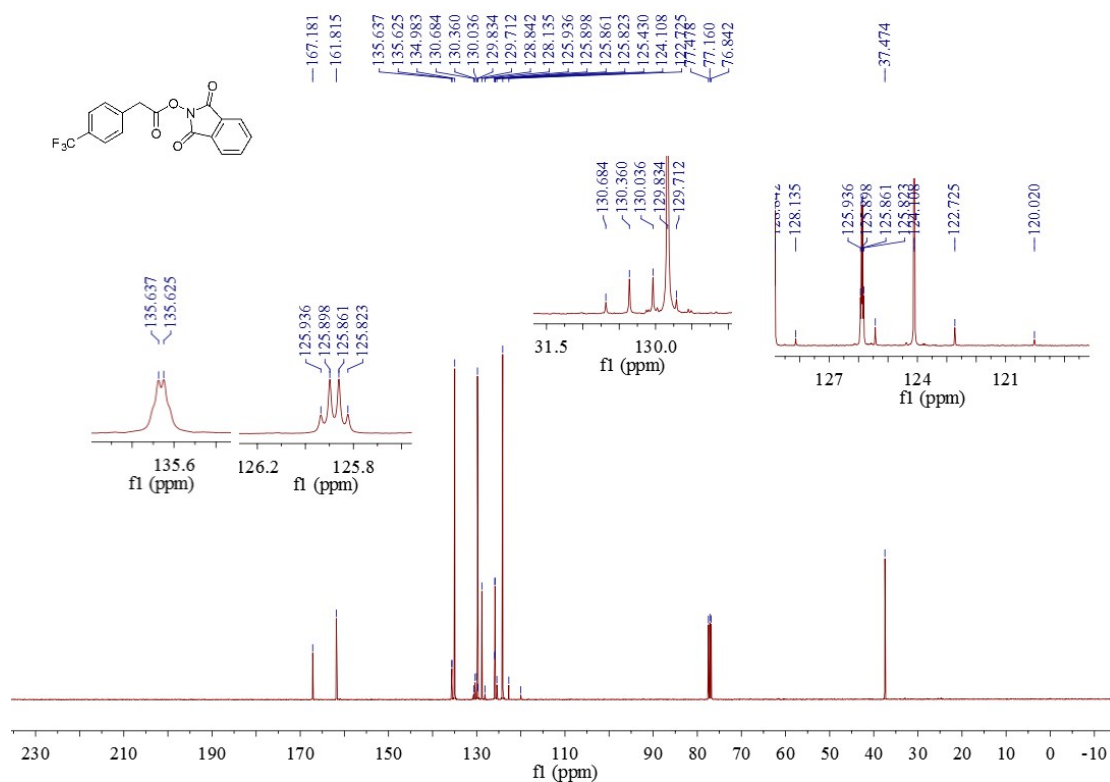

1,3-dioxoisindolin-2-yl 2-methyl-2-phenylpropanoate **a7**

### <sup>1</sup>H-NMR

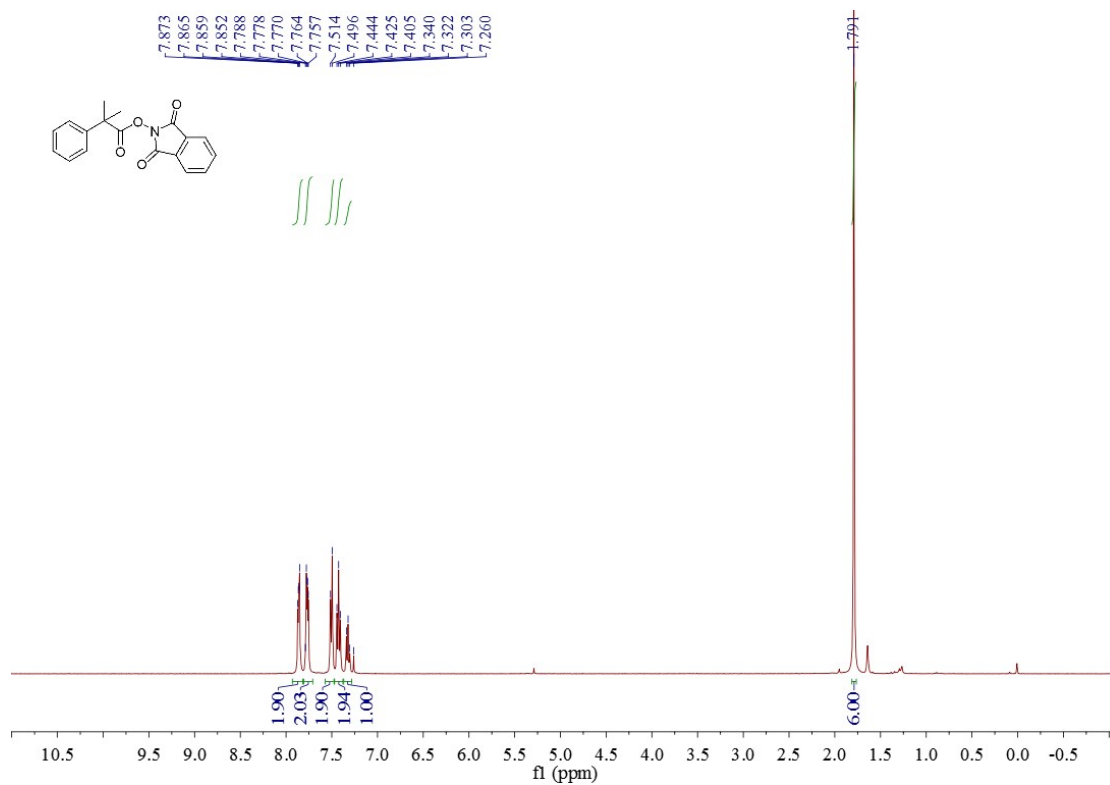

**<sup>13</sup>C-NMR**

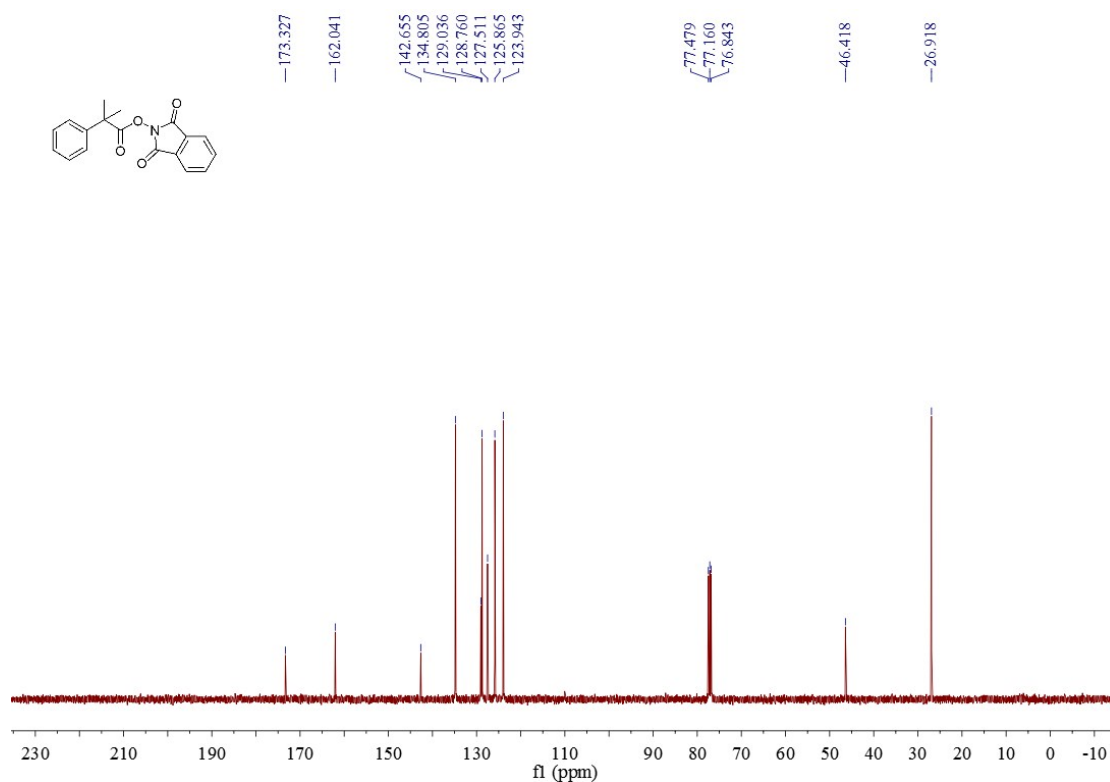

1,3-dioxisoindolin-2-yl 1-(p-tolyl)cyclopropane-1-carboxylate **a8**

**<sup>1</sup>H-NMR**

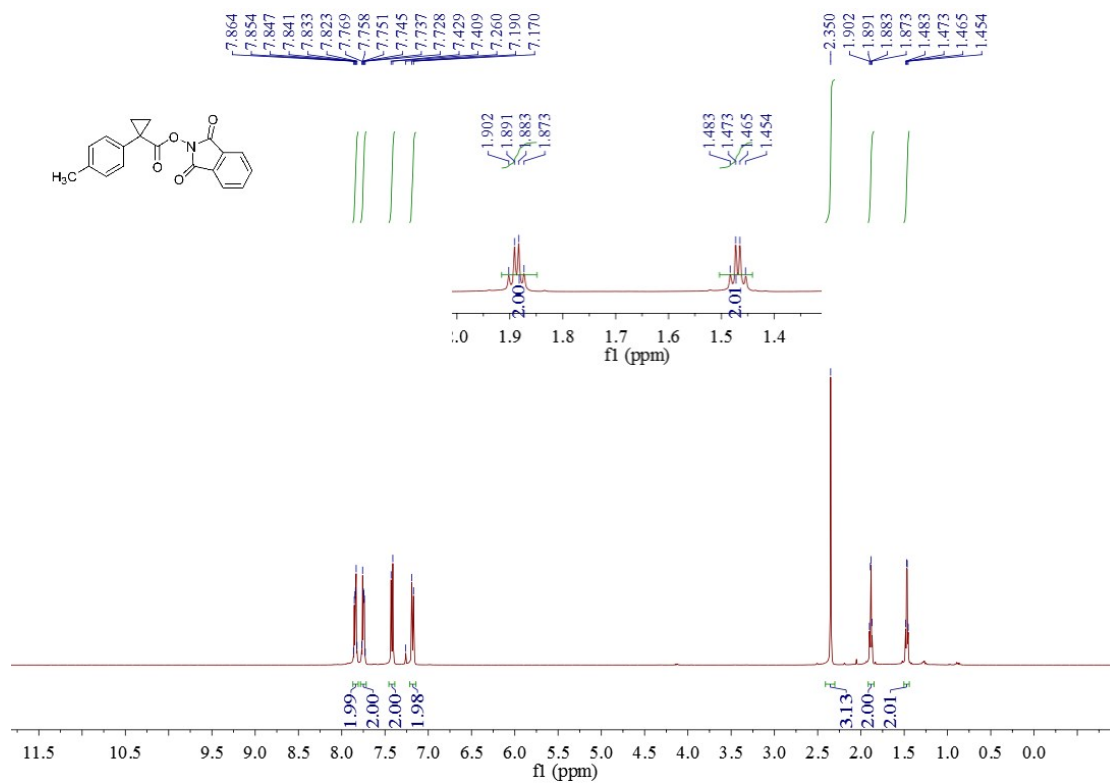

**<sup>13</sup>C-NMR**

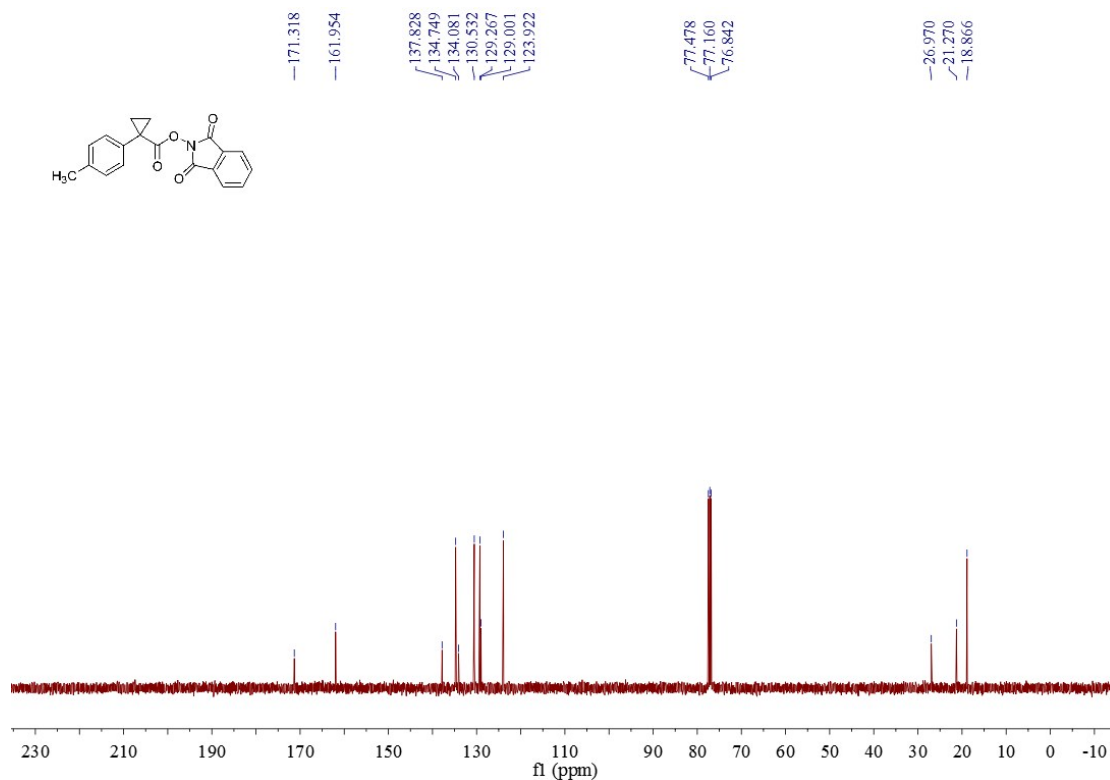

4,5,6,7-tetrachloro-1,3-dioxoisindolin-2-yl 3-cyclohexylpropanoate **a10**

**<sup>1</sup>H-NMR**

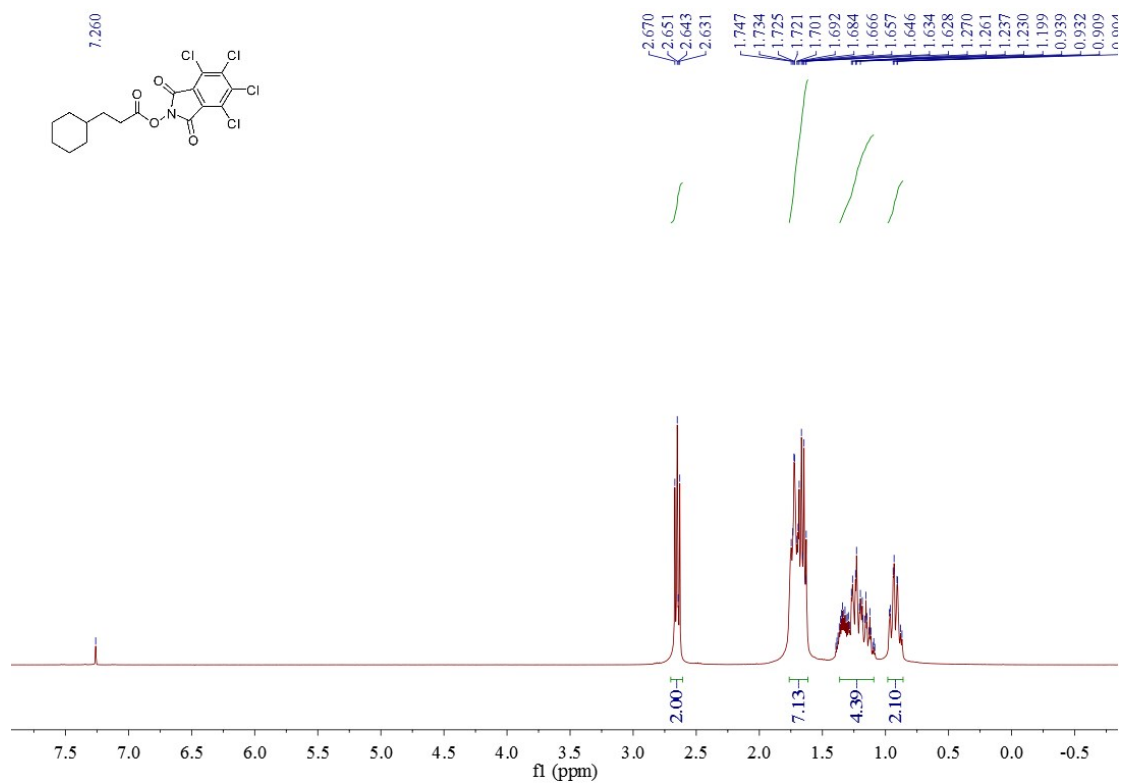

### <sup>13</sup>C-NMR

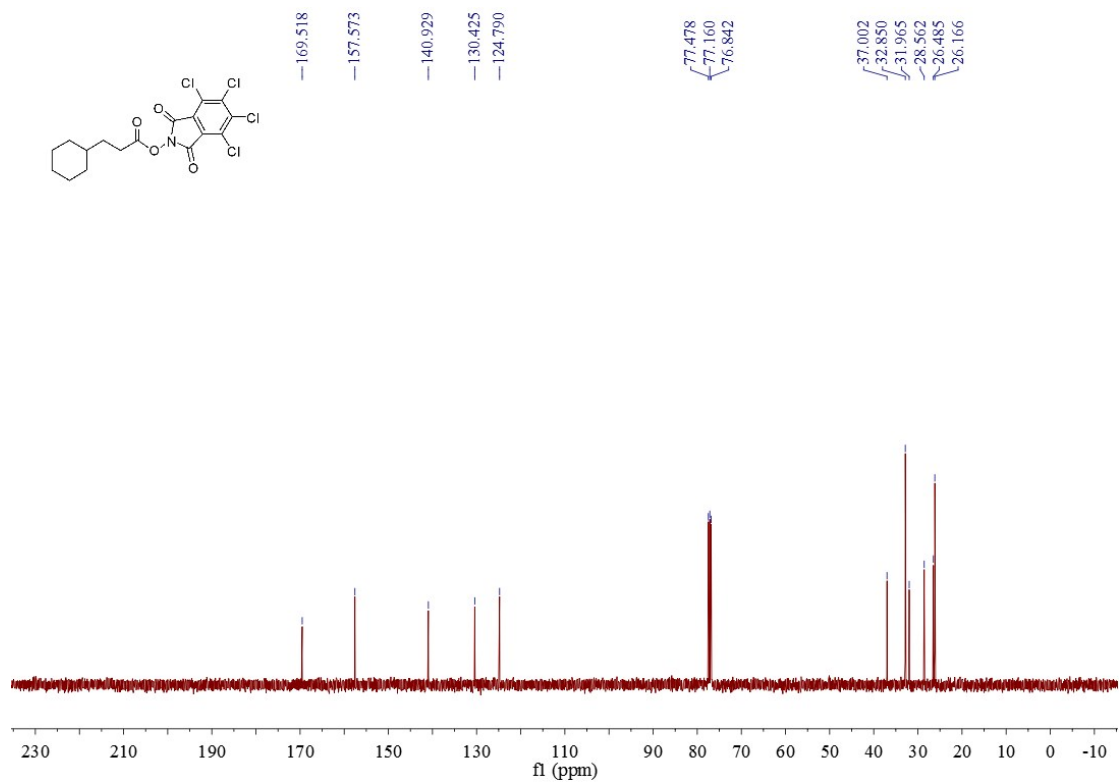

### 4,5,6,7-tetrachloro-1,3-dioxoisindolin-2-yl cyclobutanecarboxylate **a13**

### <sup>1</sup>H-NMR

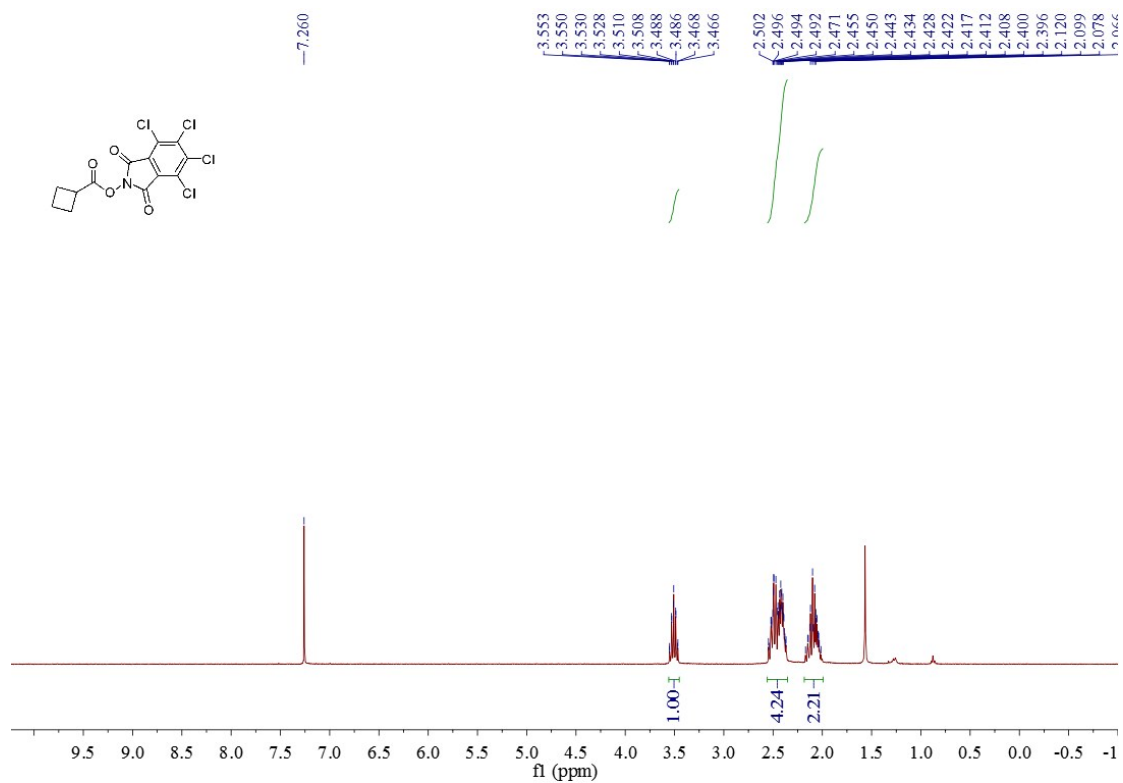

**<sup>13</sup>C-NMR**

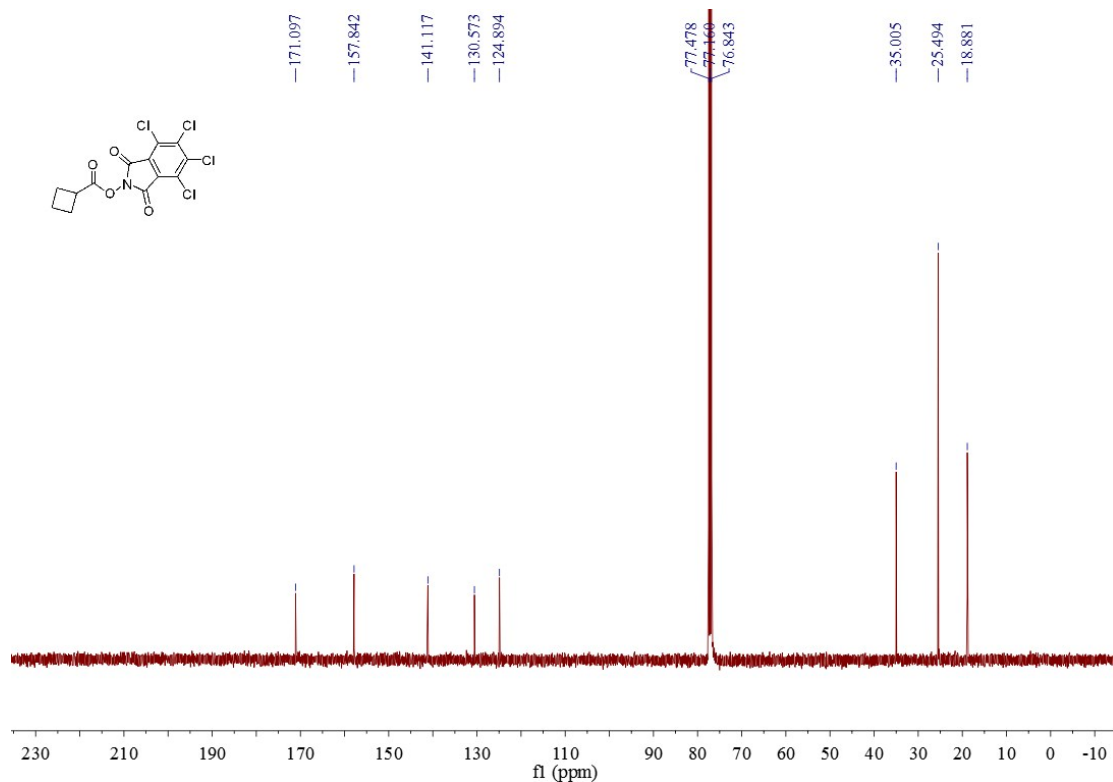

4,5,6,7-tetrachloro-1,3-dioxisoindolin-2-yl 2-phenoxypropanoate **a17**

**<sup>1</sup>H-NMR**



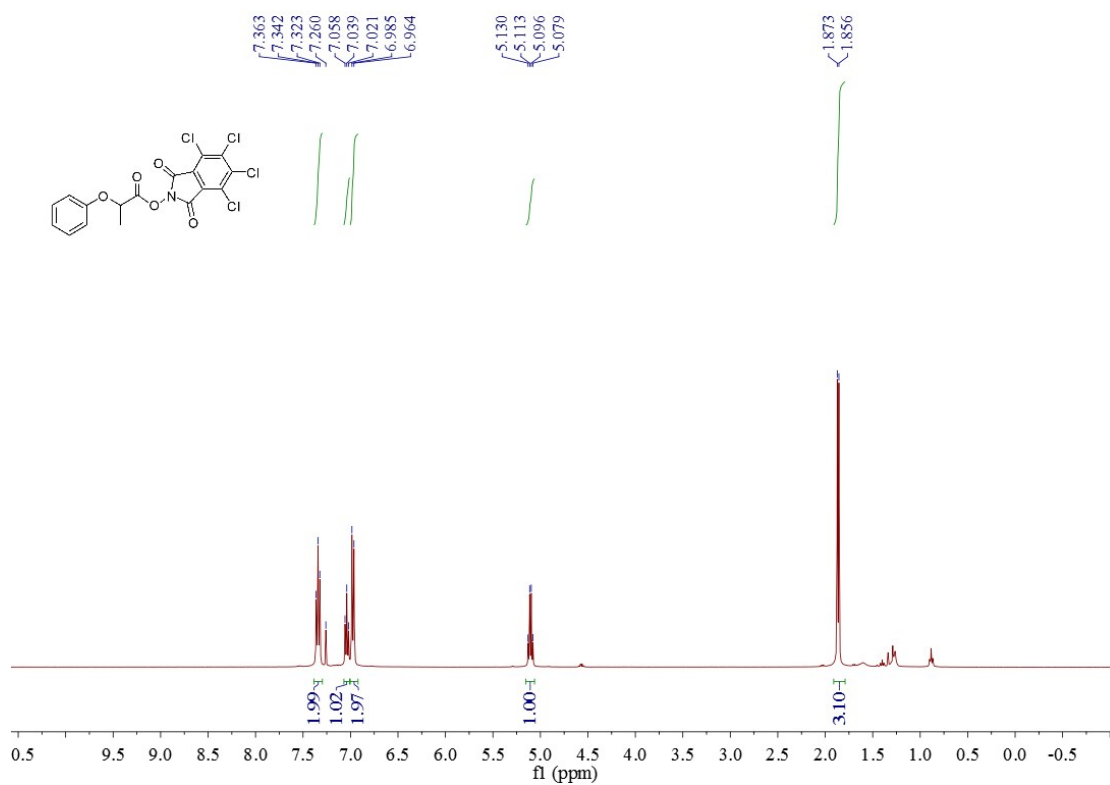

**<sup>13</sup>C-NMR**

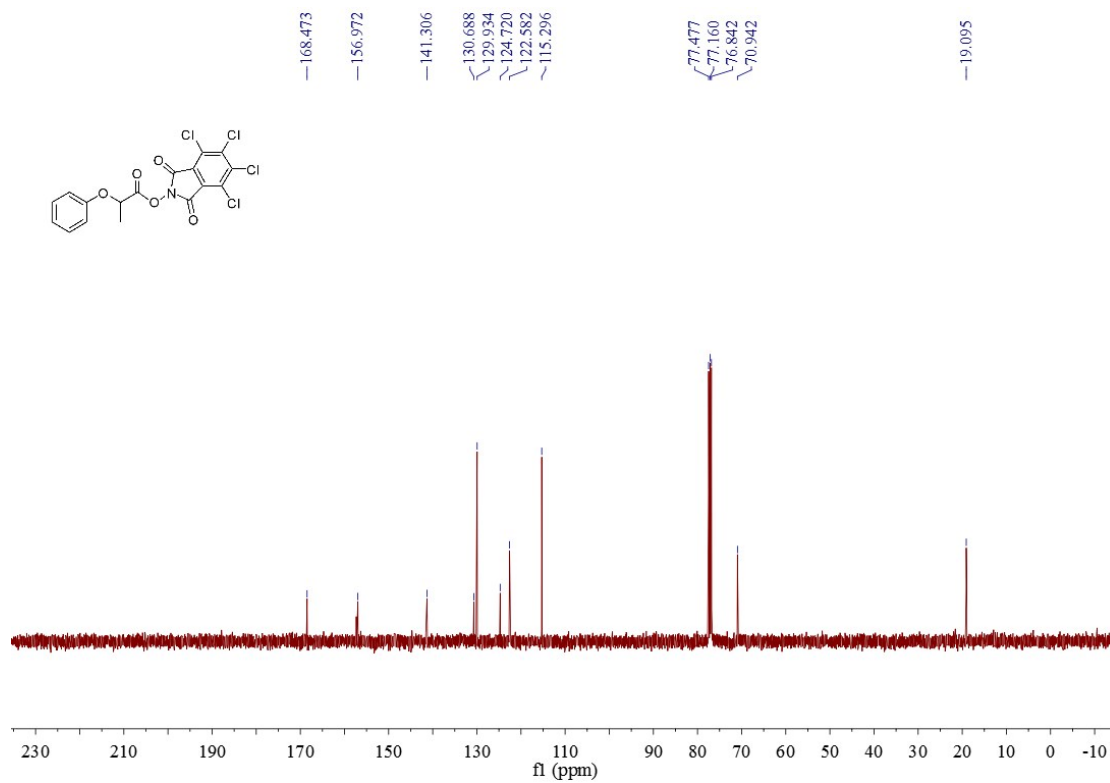

4,5,6,7-tetrachloro-1,3-dioxoisindolin-2-yl 2-phenylacetate **a18**

**<sup>1</sup>H-NMR**

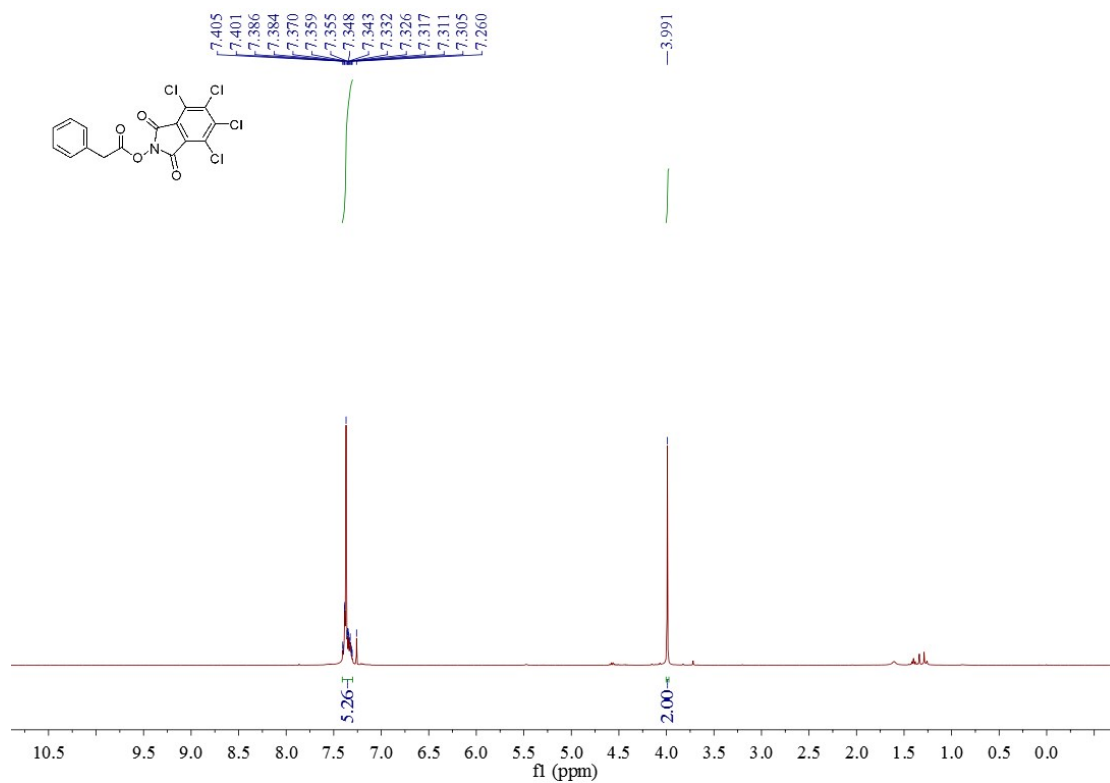

**<sup>13</sup>C-NMR**

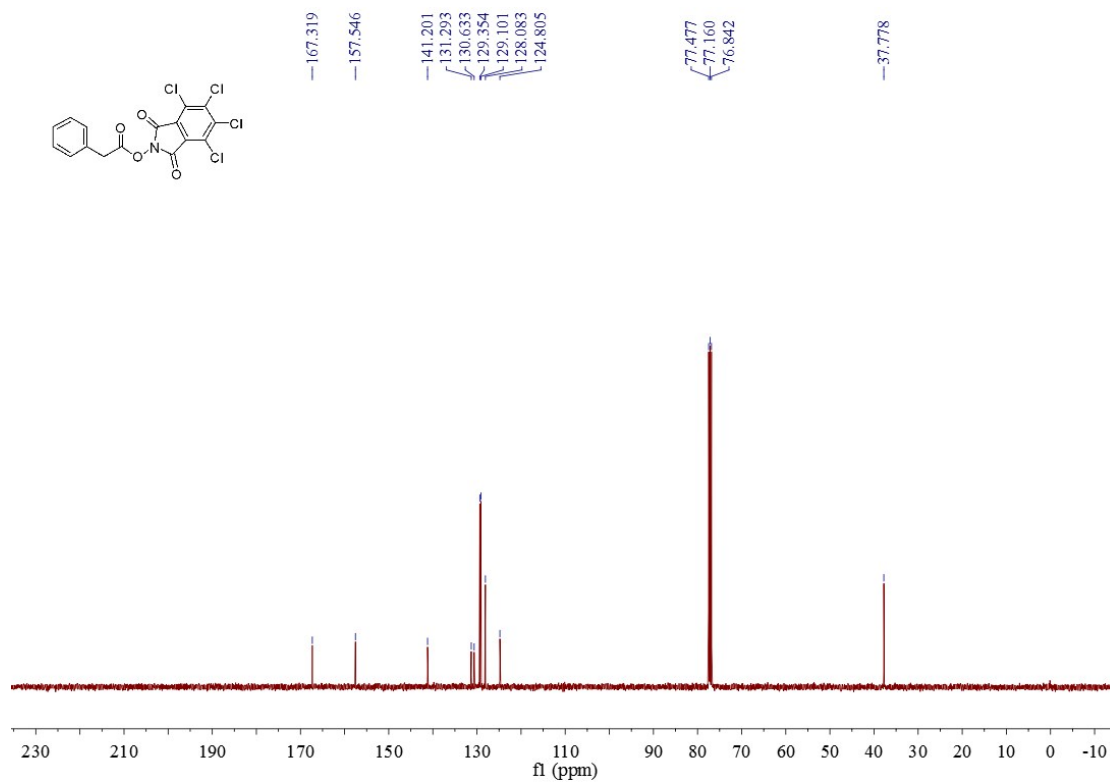

but-1-yne-1,3-diylidibenzene c1

**<sup>1</sup>H-NMR**

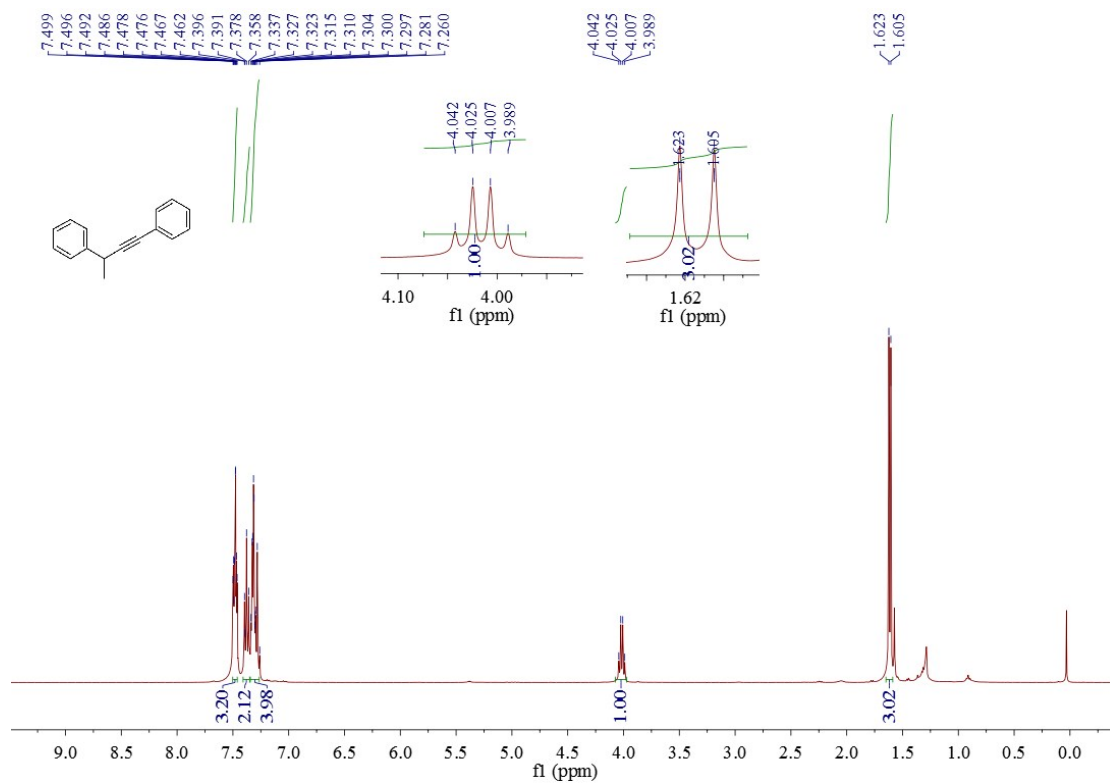

**<sup>13</sup>C-NMR**

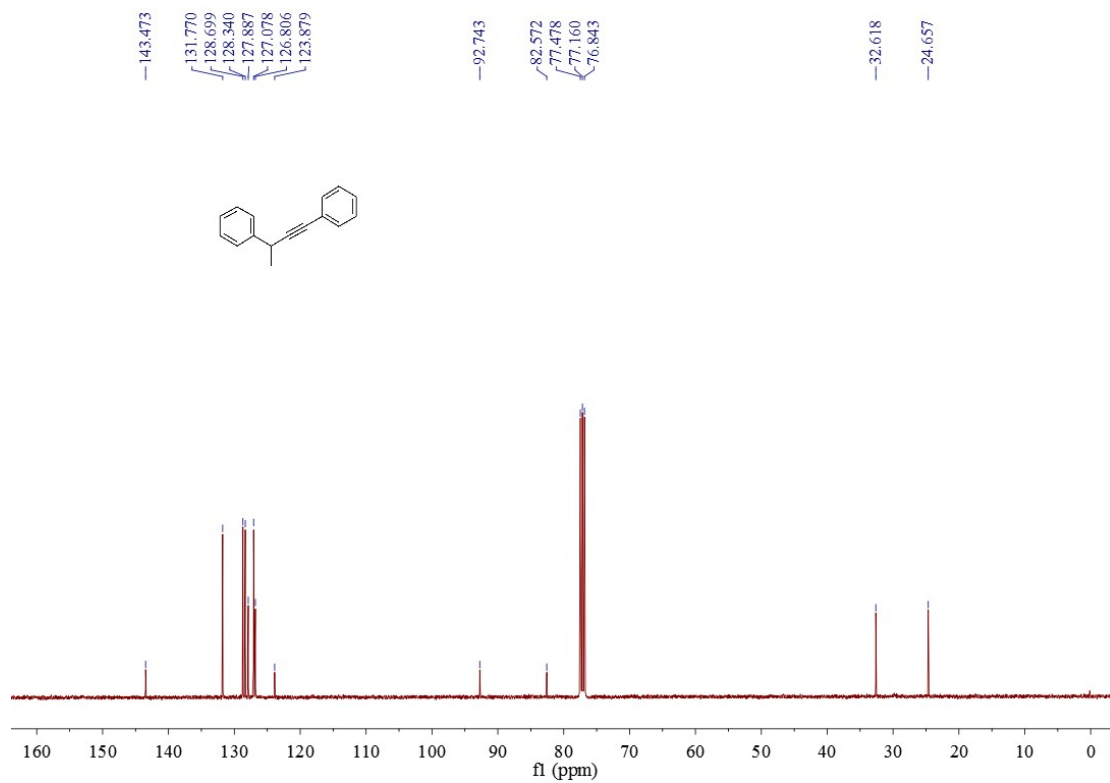

4-(3-phenylprop-2-yn-1-yl)-1,1'-biphenyl c2

**<sup>1</sup>H NMR**

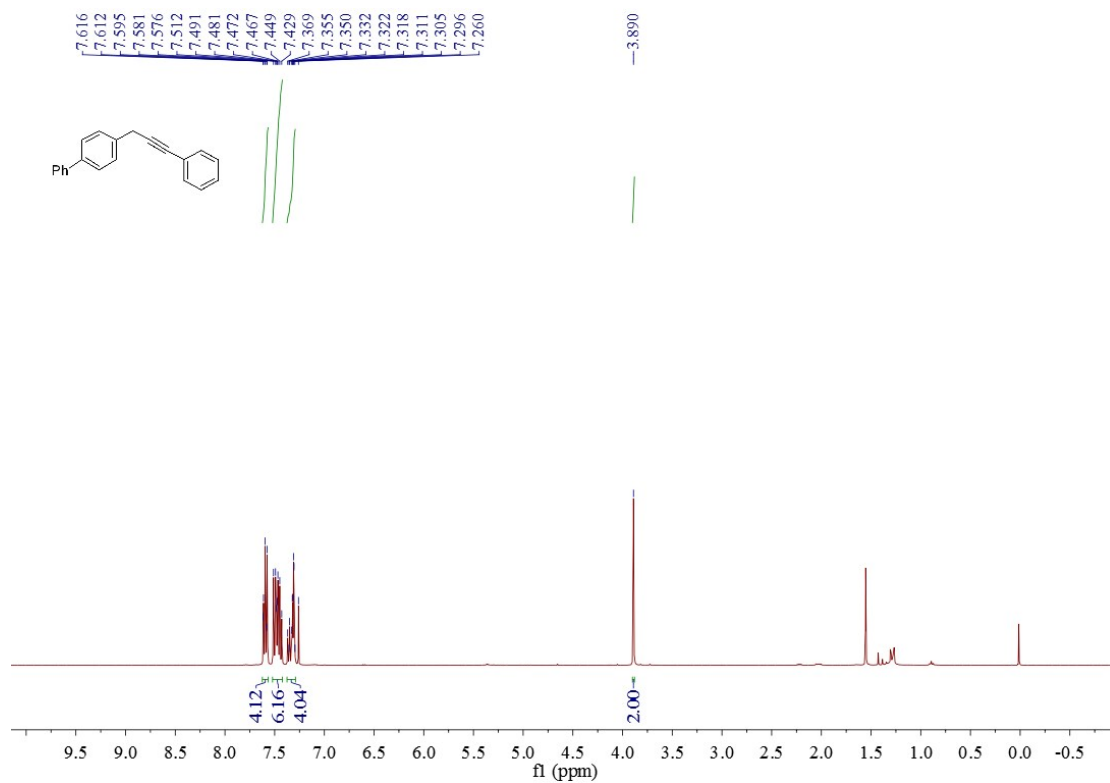

<sup>13</sup>C NMR

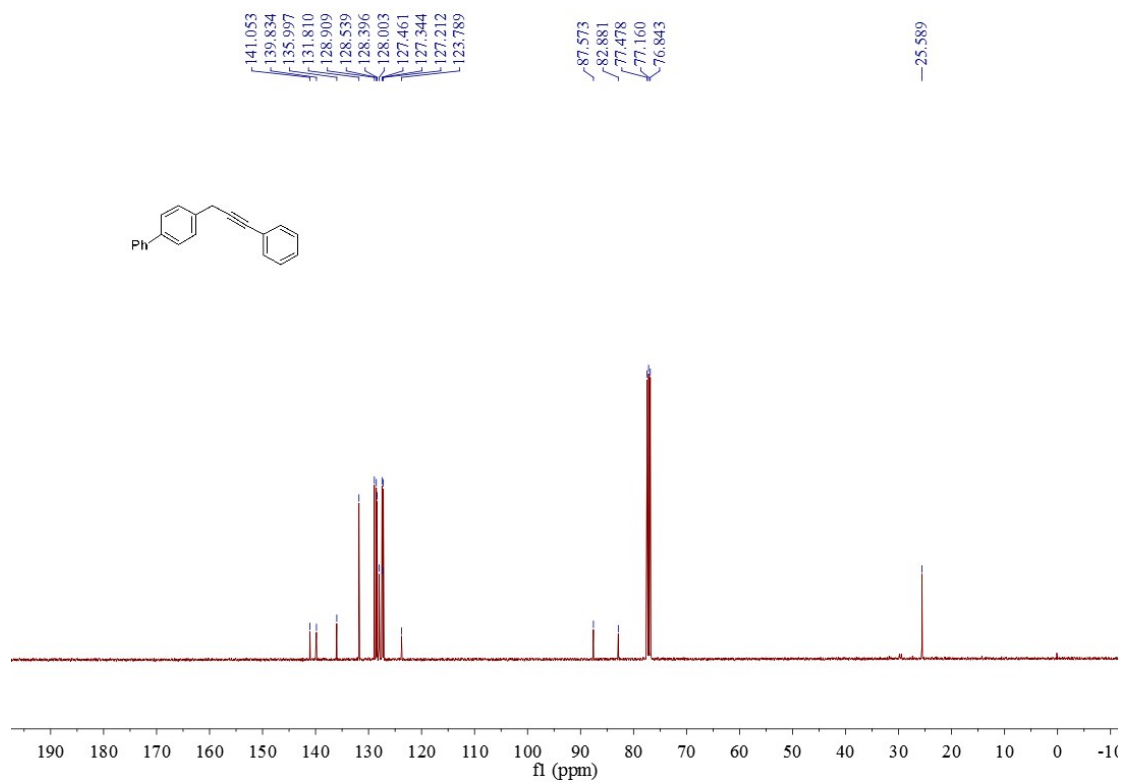

2-(3-phenylprop-2-yn-1-yl)naphthalene **c3**

### <sup>1</sup>H NMR

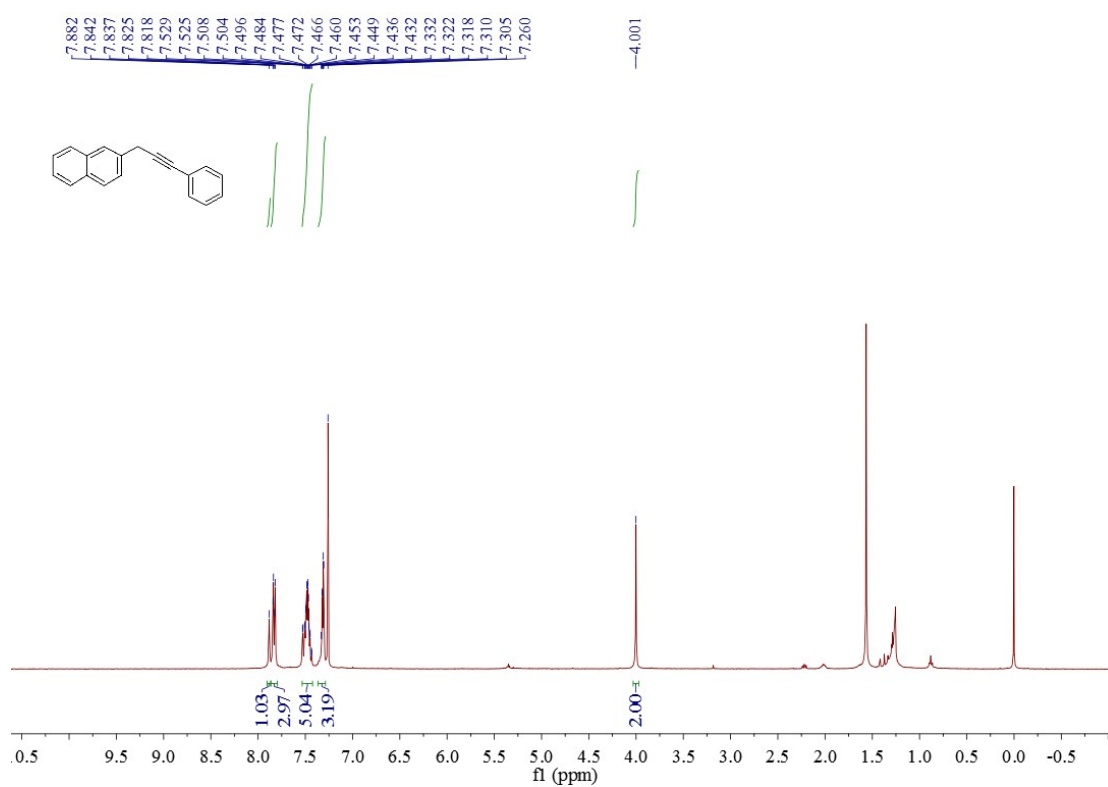

### <sup>13</sup>C NMR

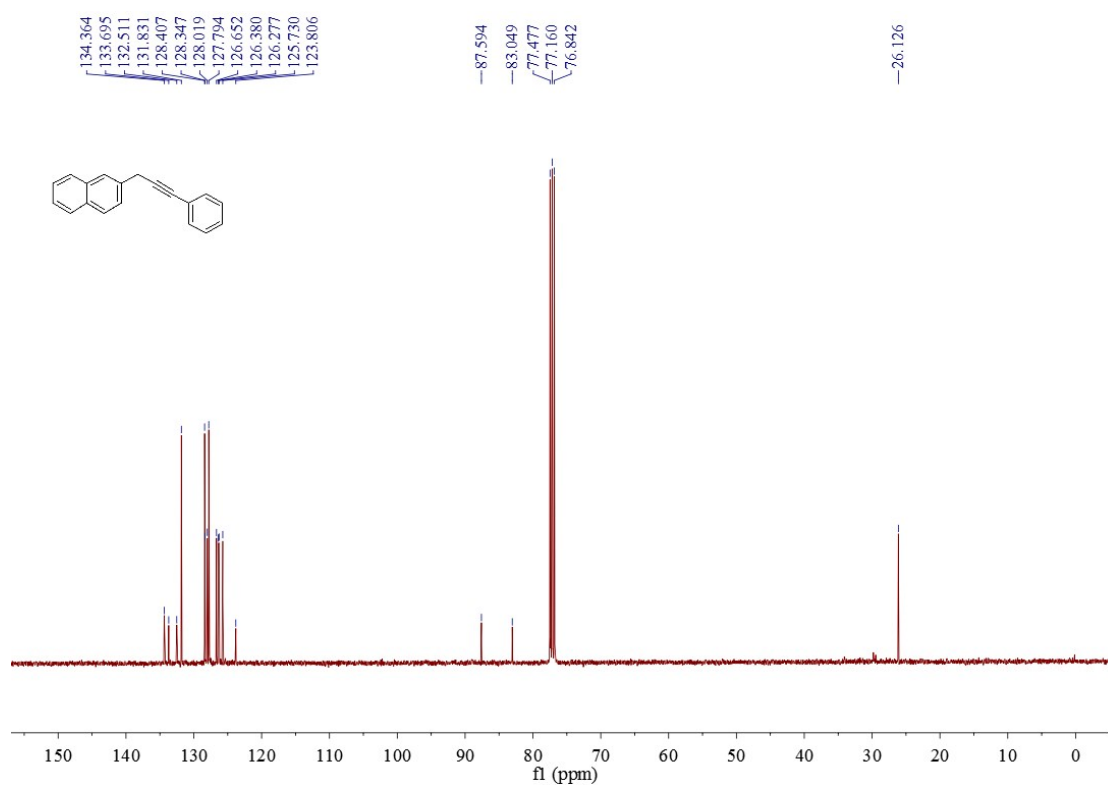

1-bromo-2-(3-phenylprop-2-yn-1-yl)benzene c4

# <sup>1</sup>H NMR

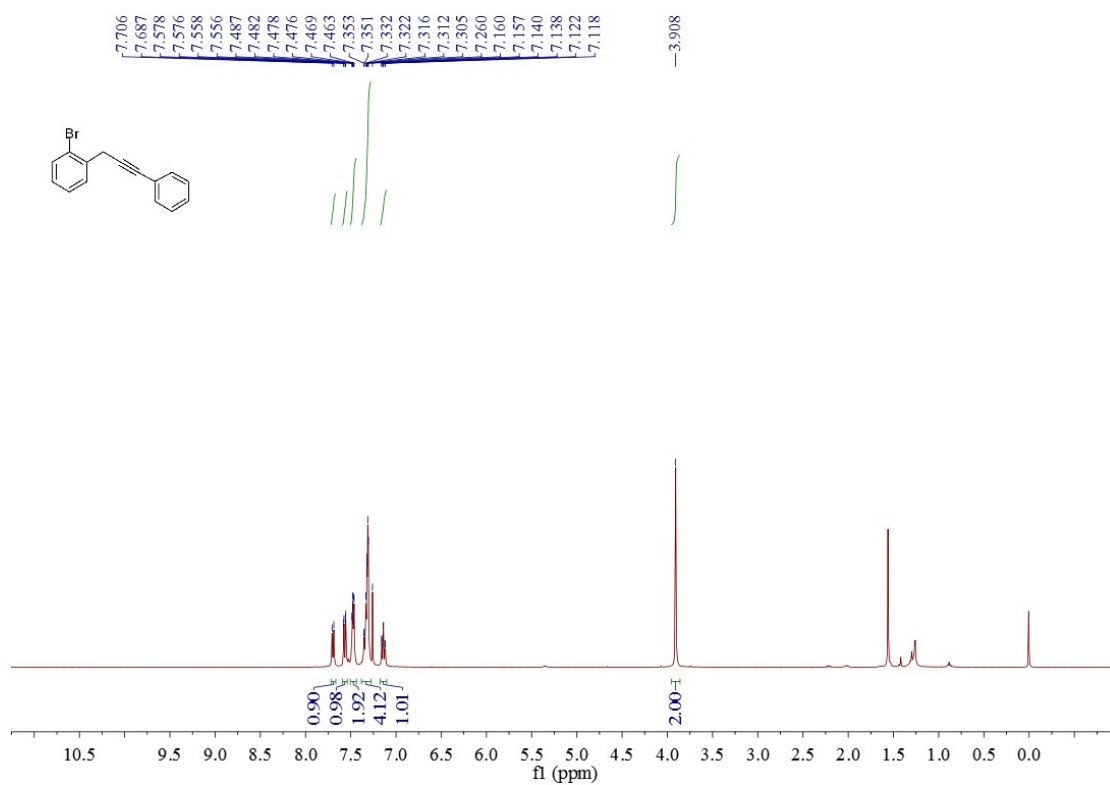

# <sup>13</sup>C NMR

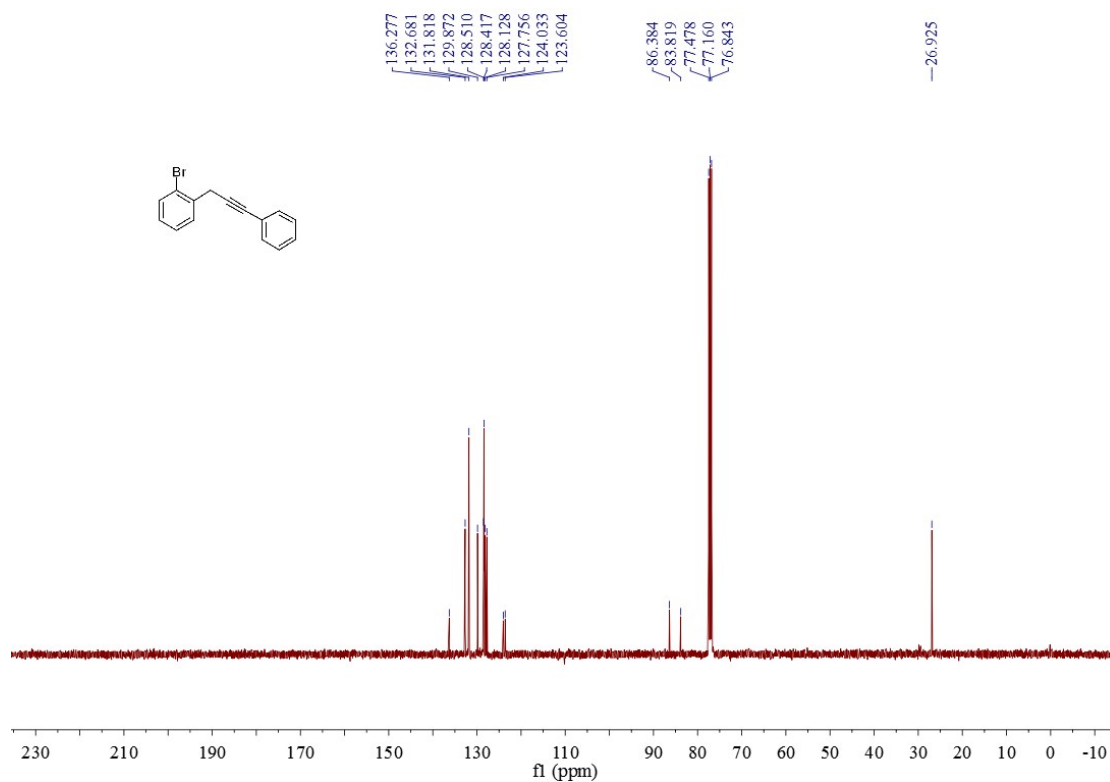

1-(3-phenylprop-2-yn-1-yl)-4-(trifluoromethyl)benzene c5

### <sup>1</sup>H-NMR

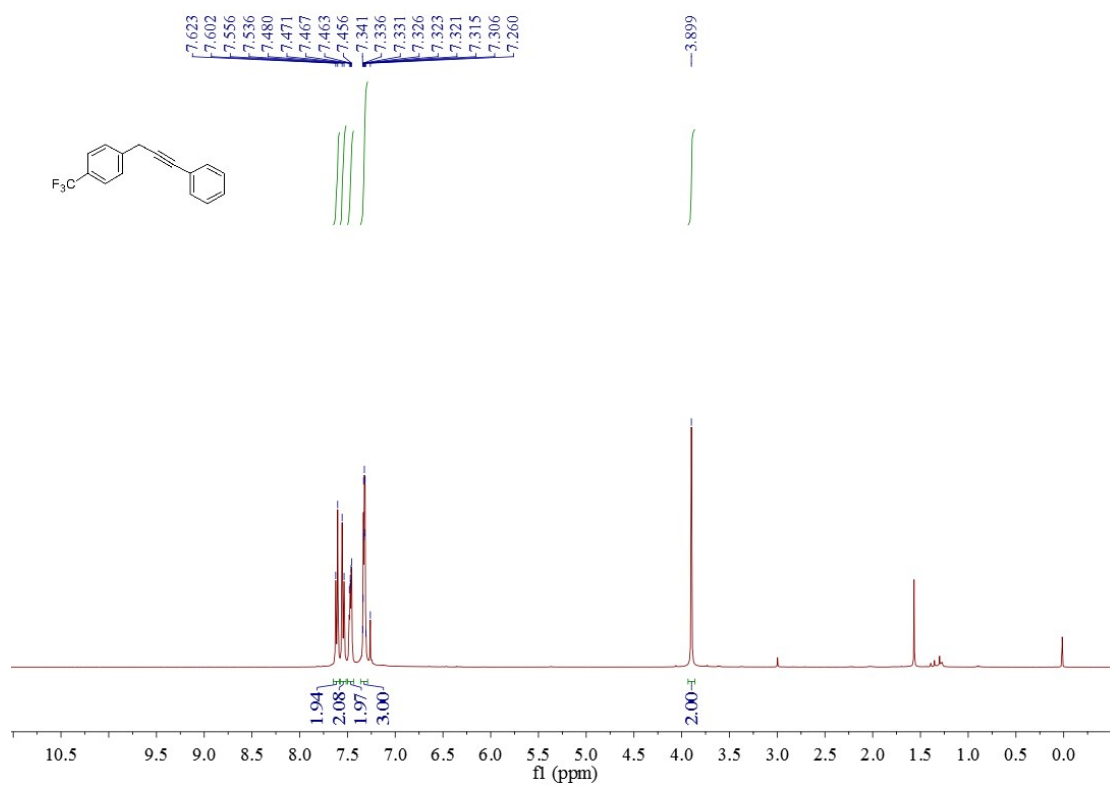

### <sup>13</sup>C-NMR

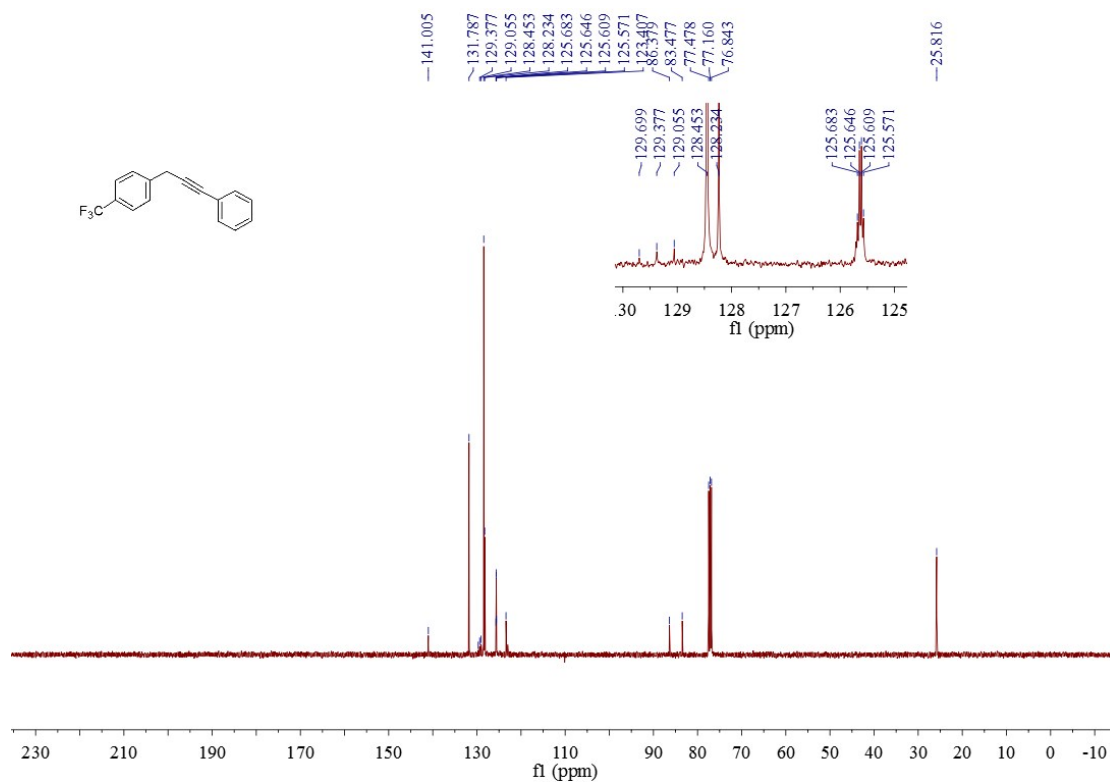

### <sup>19</sup>F-NMR

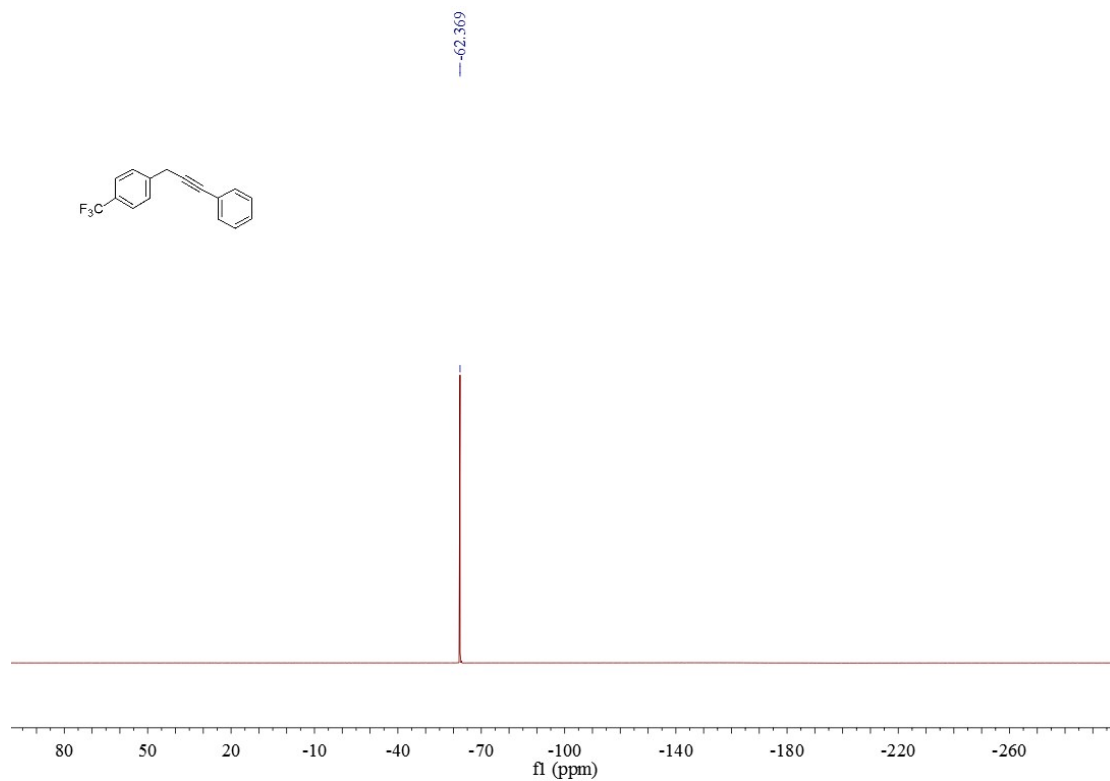

but-1-yne-1,4-diylidibenzene **c6**

$^1\text{H}$  NMR

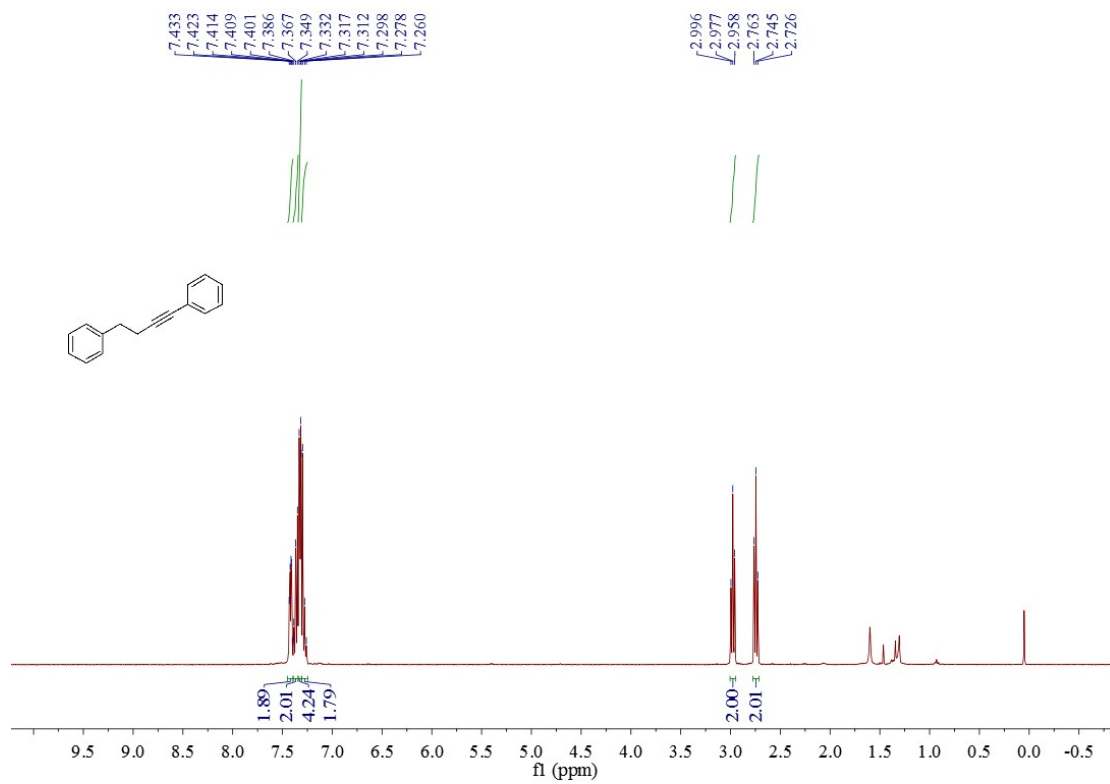

$^{13}\text{C}$  NMR



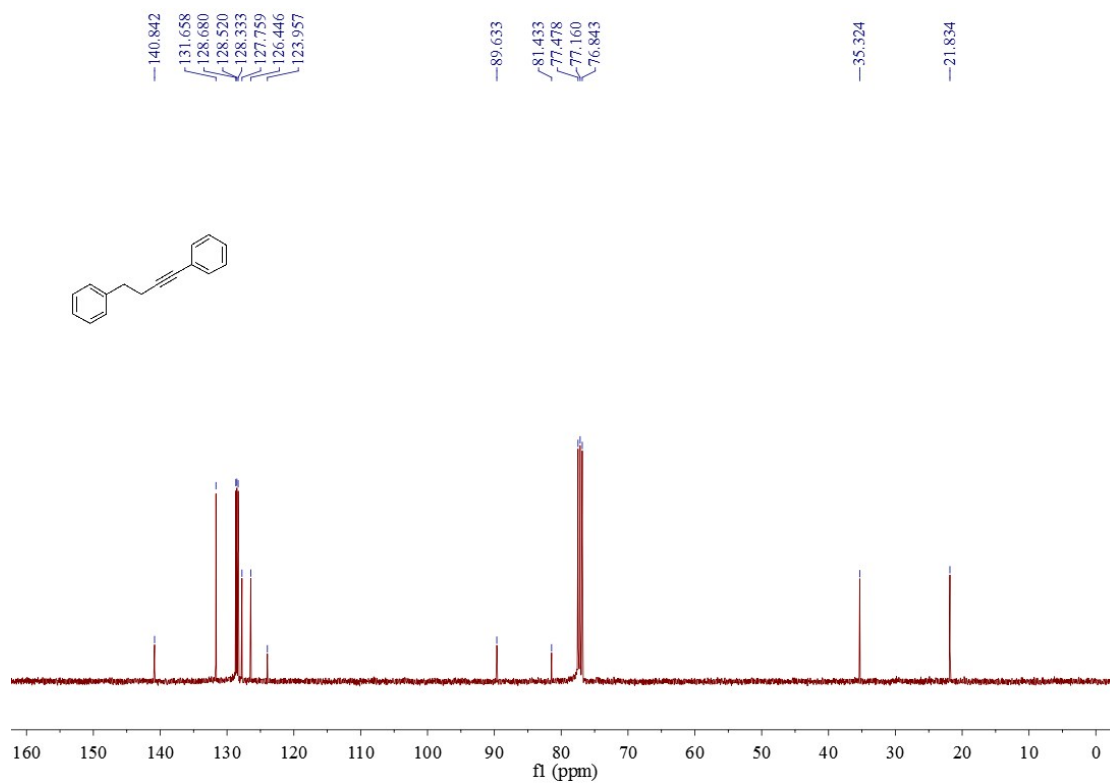

(4-cyclohexylbut-1-yn-1-yl)benzene **c7**

<sup>1</sup>H NMR

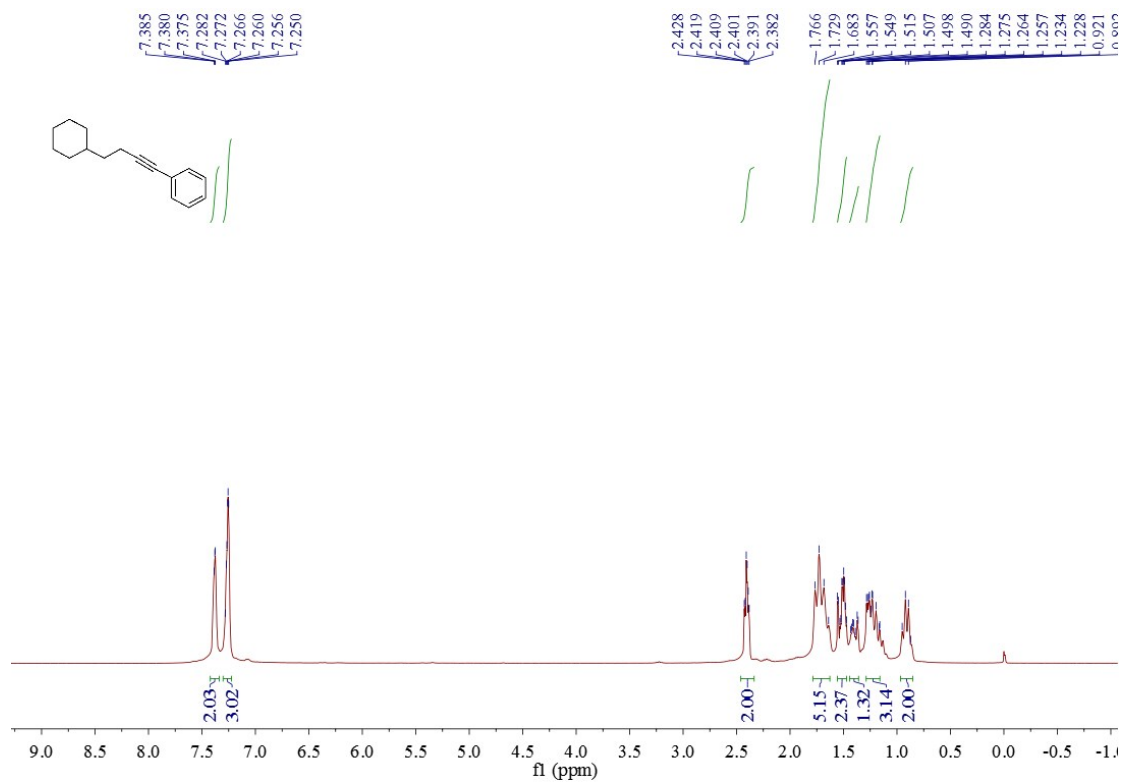

<sup>13</sup>C NMR

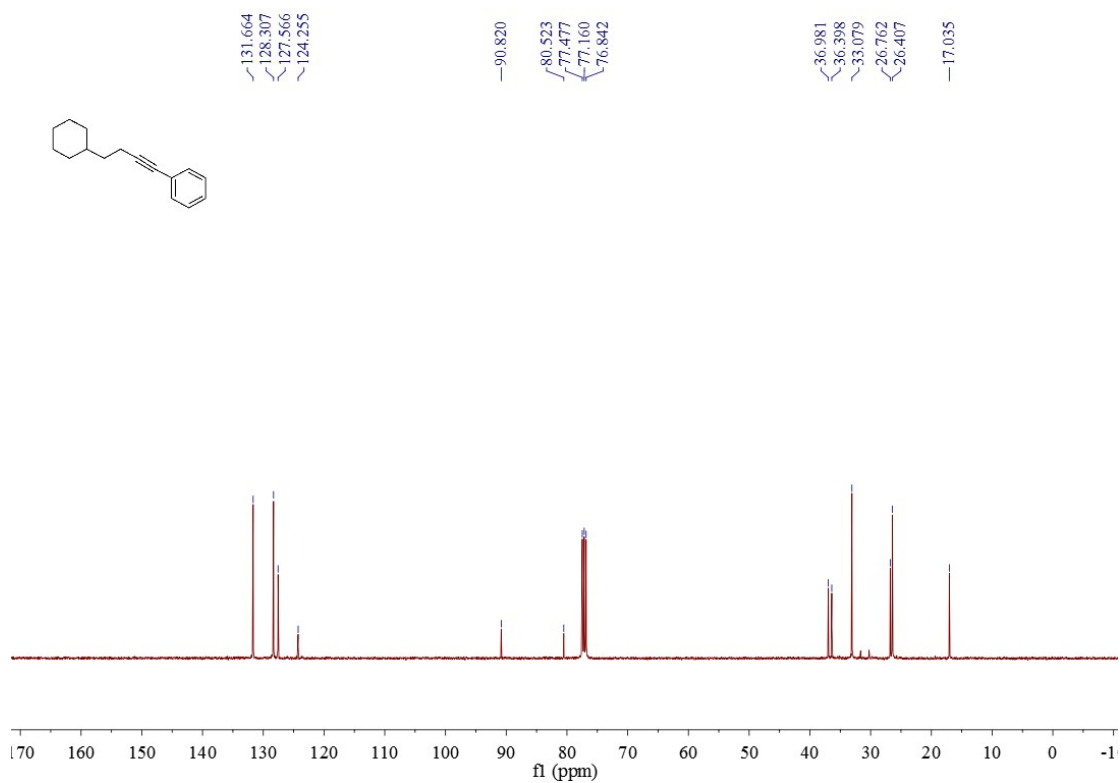

(4-cyclopentylbut-1-yn-1-yl)benzene **c8**

<sup>1</sup>H NMR

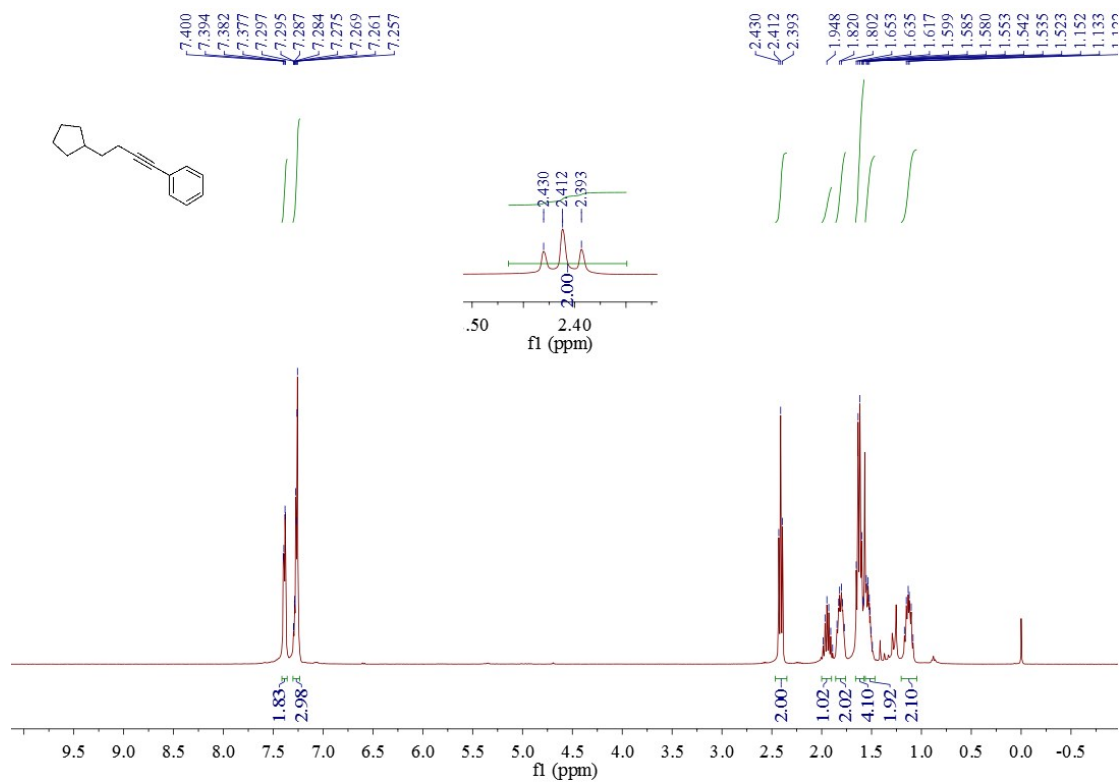

# <sup>13</sup>C NMR

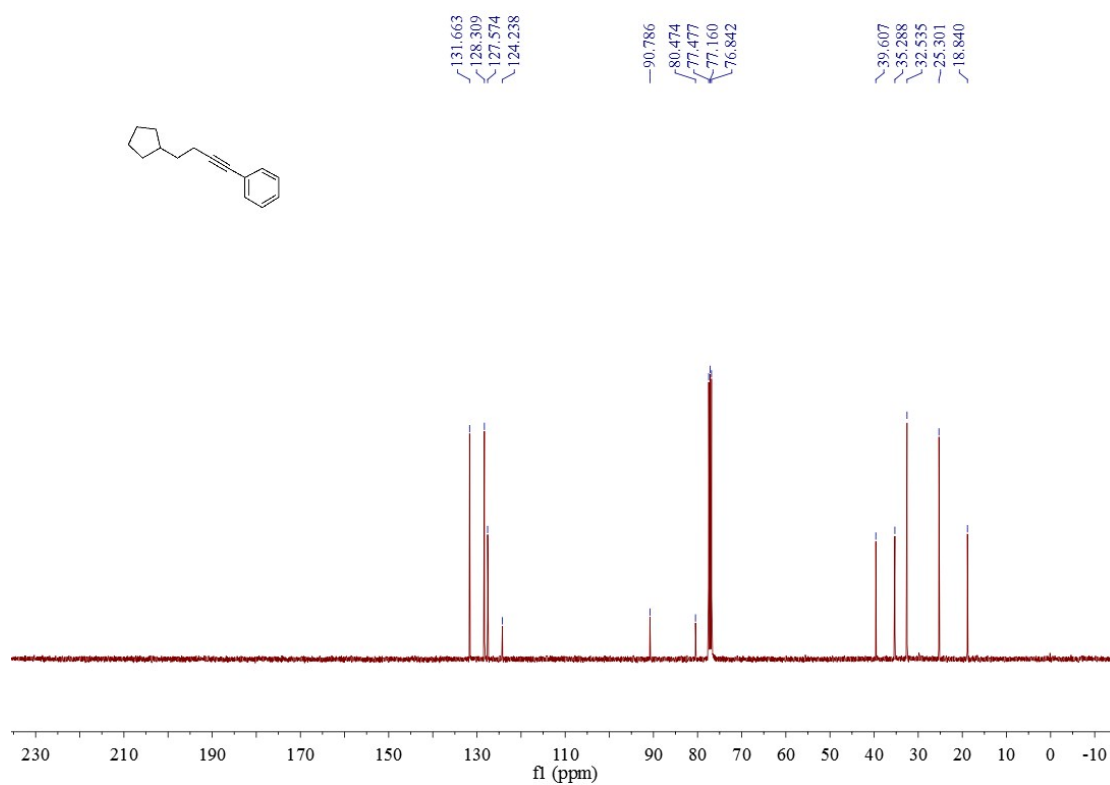

# 1-(phenylethynyl)adamantane **c9**

## <sup>1</sup>H NMR

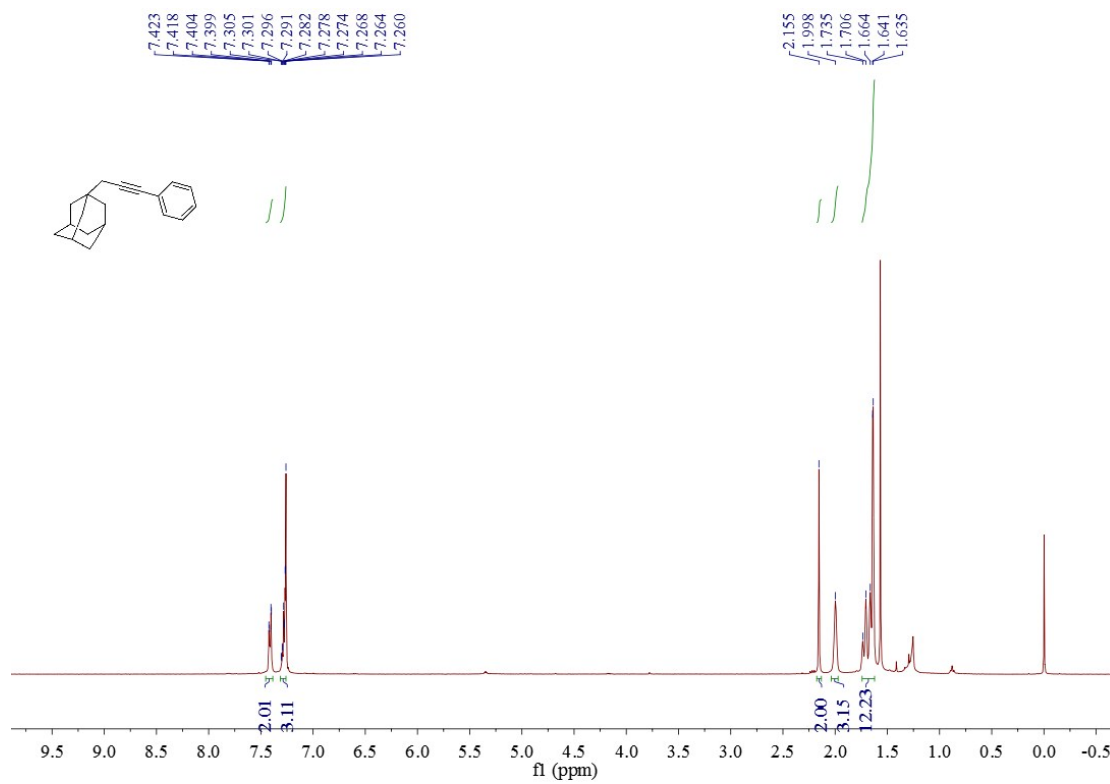

# <sup>13</sup>C NMR

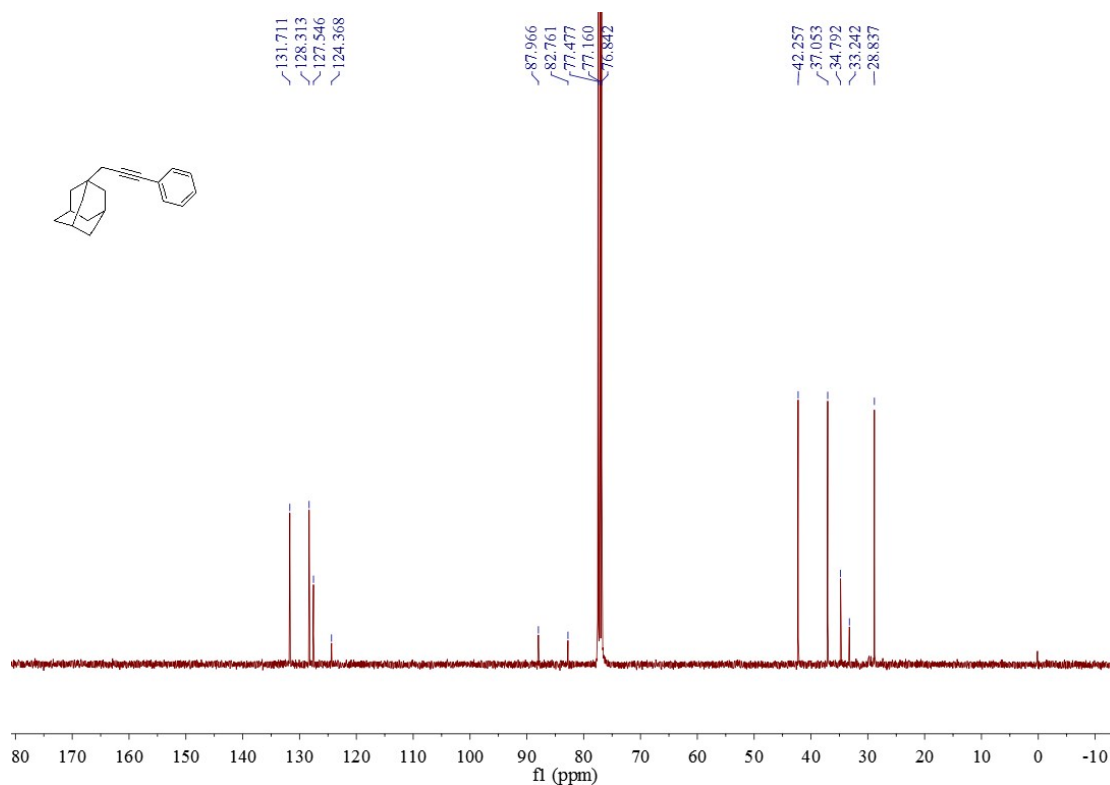

## (cyclobutylethynyl)benzene c10

# <sup>1</sup>H NMR

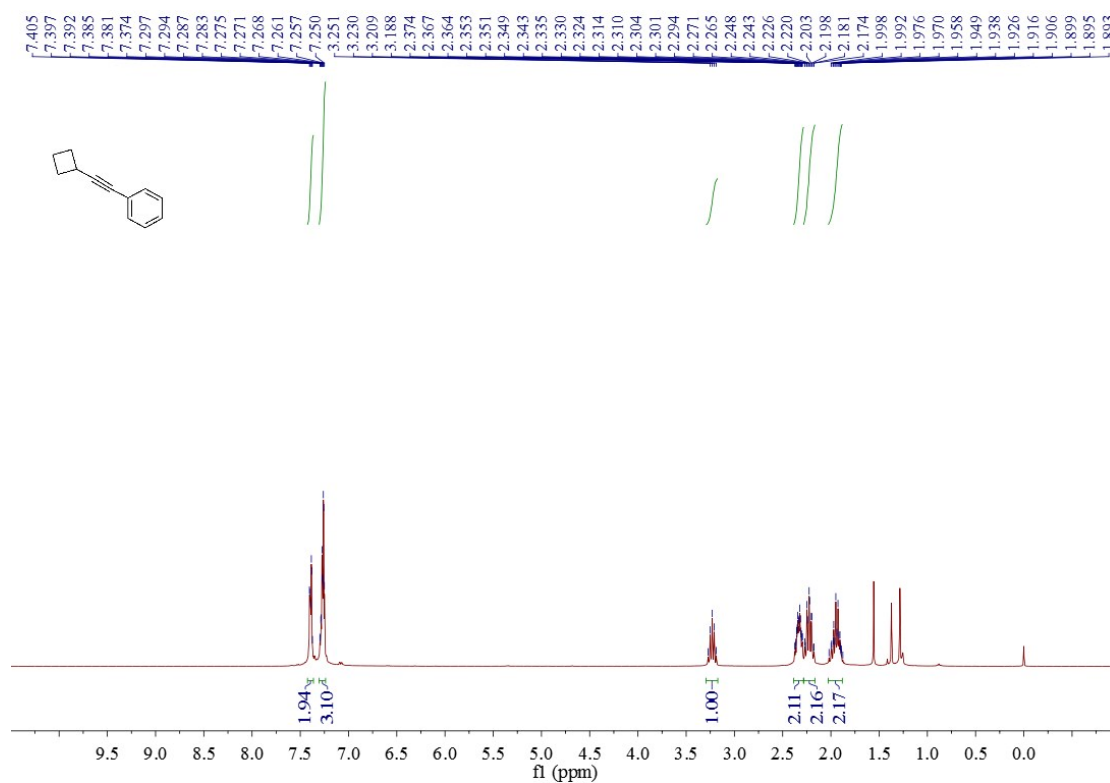

# <sup>13</sup>C NMR

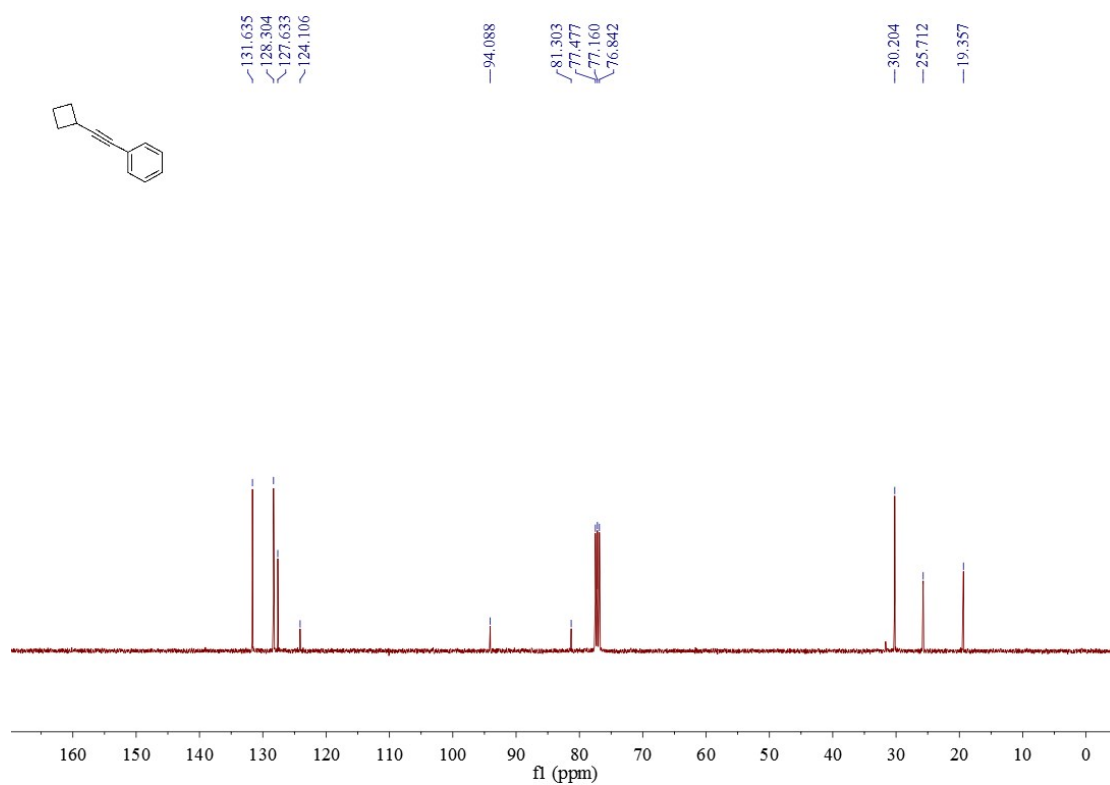

(cyclopentylethynyl)benzene **c11**

# <sup>1</sup>H-NMR

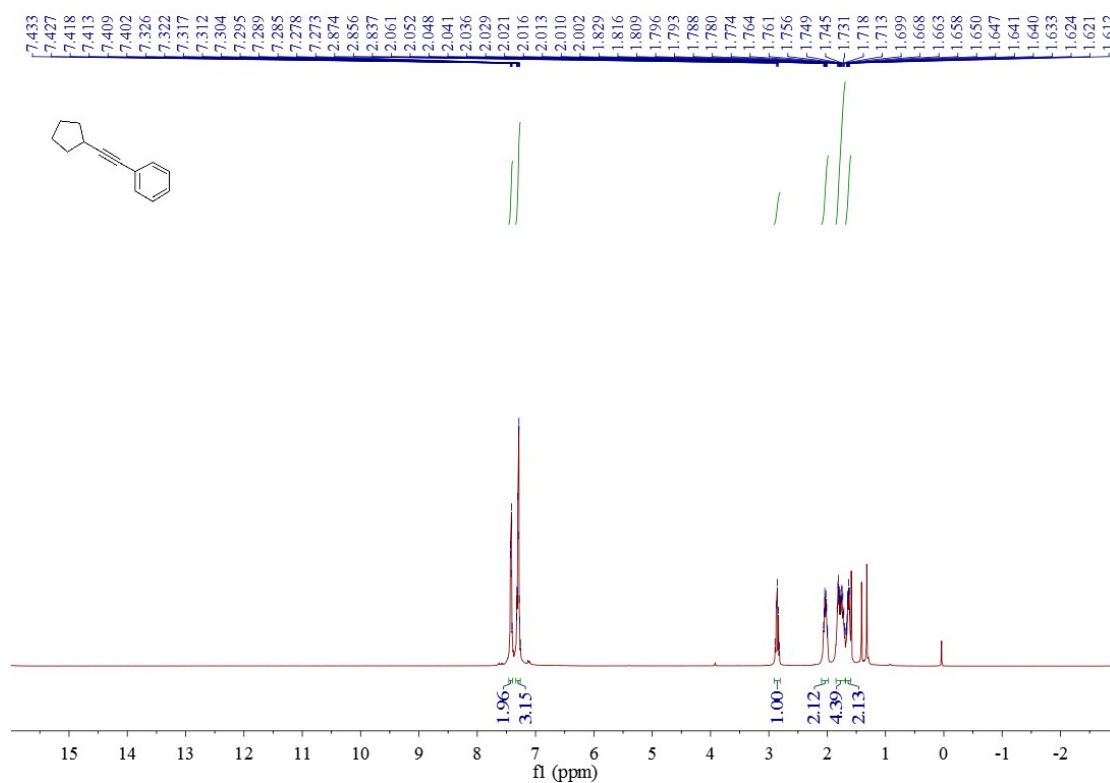

### <sup>13</sup>C-NMR

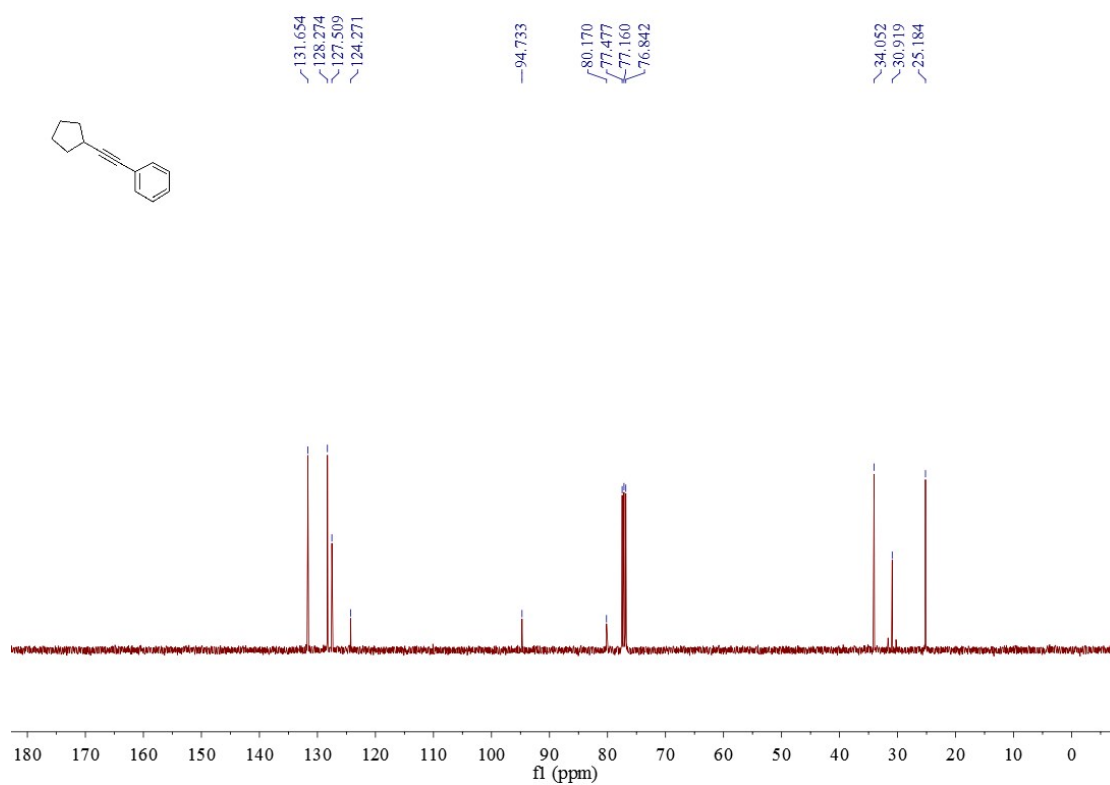

### (cyclohexylethynyl)benzene **c12**

### <sup>1</sup>H NMR

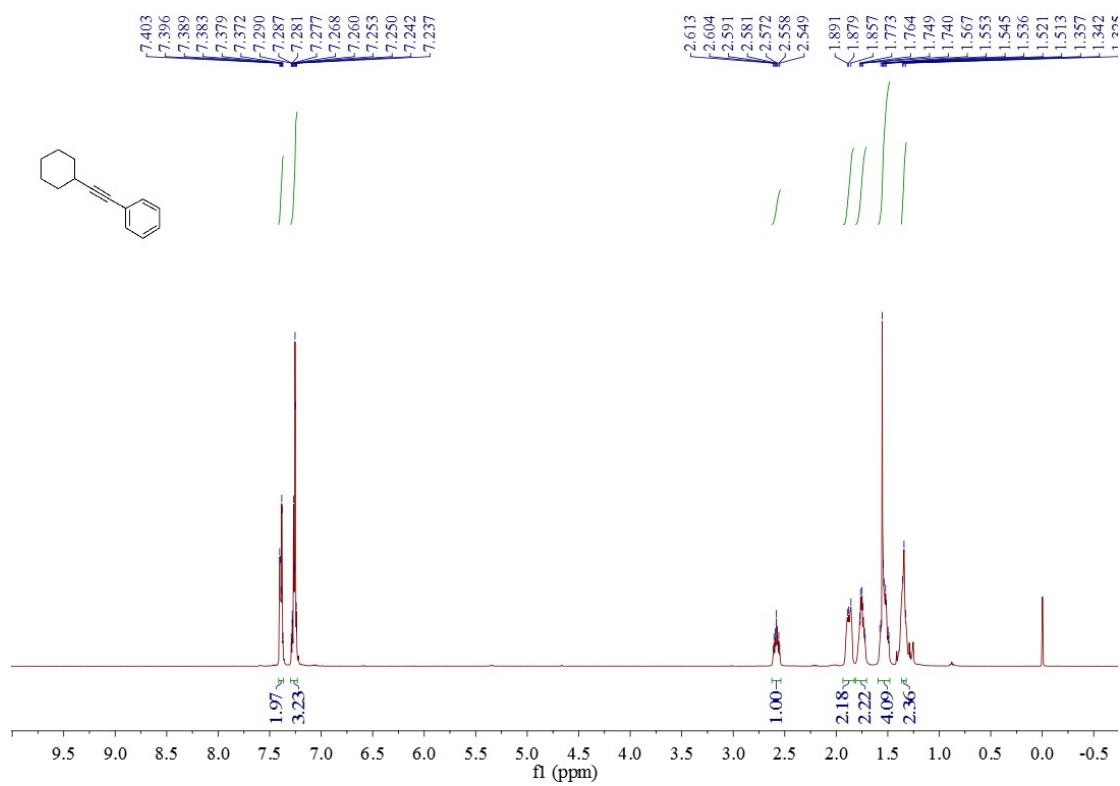

### <sup>13</sup>C NMR

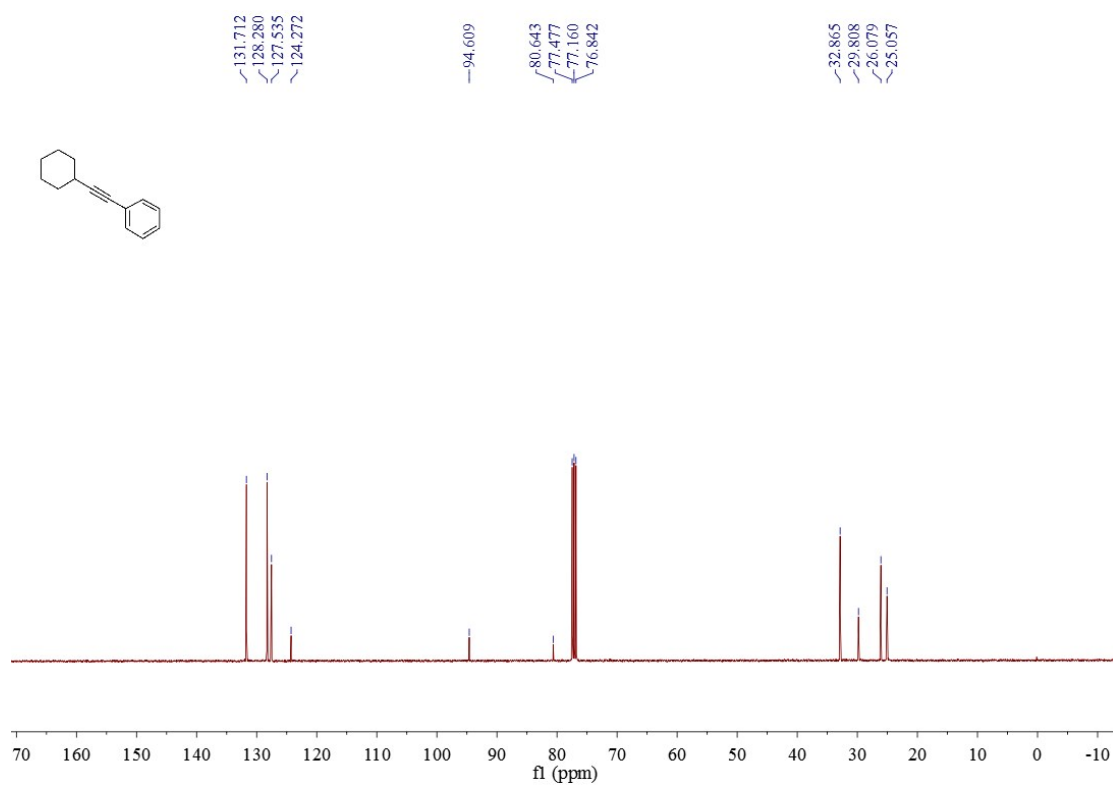

### (3-ethylhept-1-yn-1-yl)benzene c13

### <sup>1</sup>H NMR

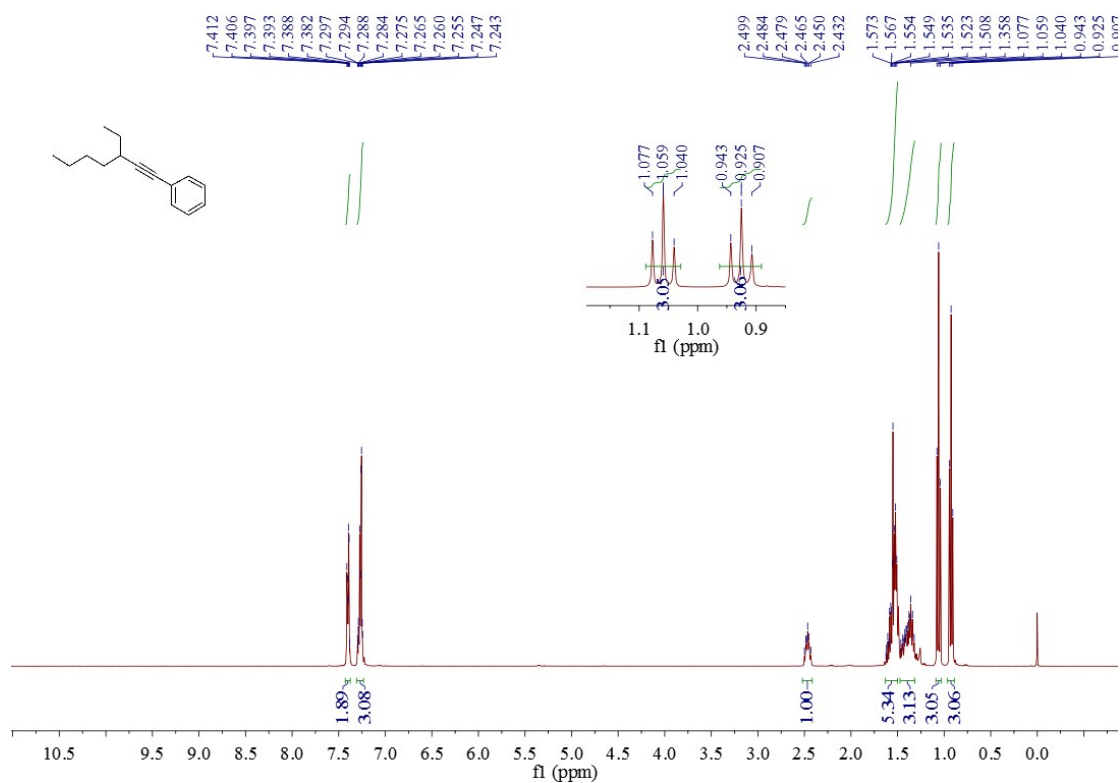

# <sup>13</sup>C NMR

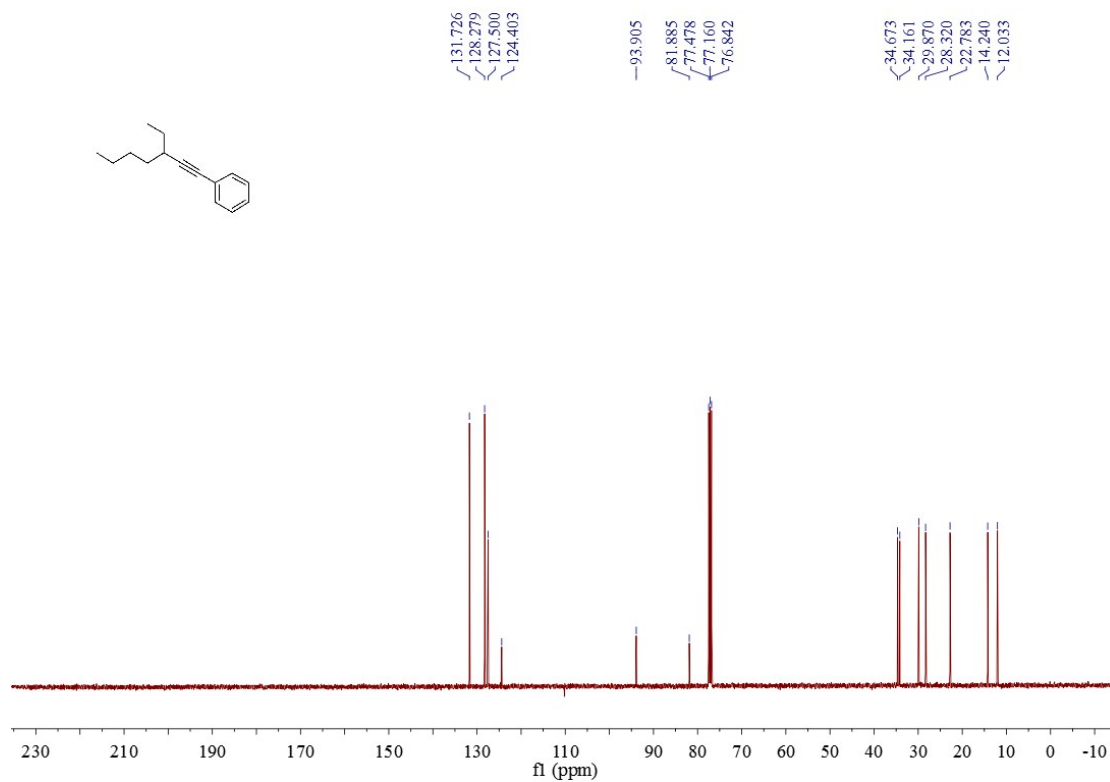

# (3-phenoxybut-1-yn-1-yl)benzene **c14**

## <sup>1</sup>H NMR

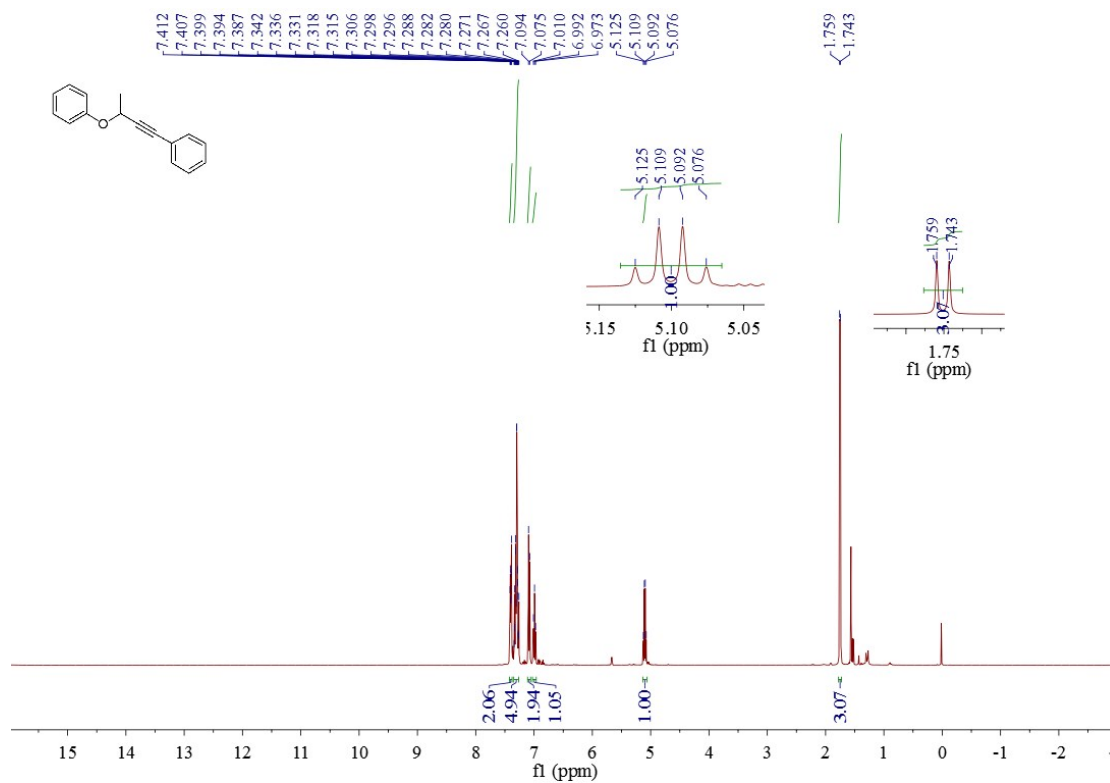



### <sup>13</sup>C NMR

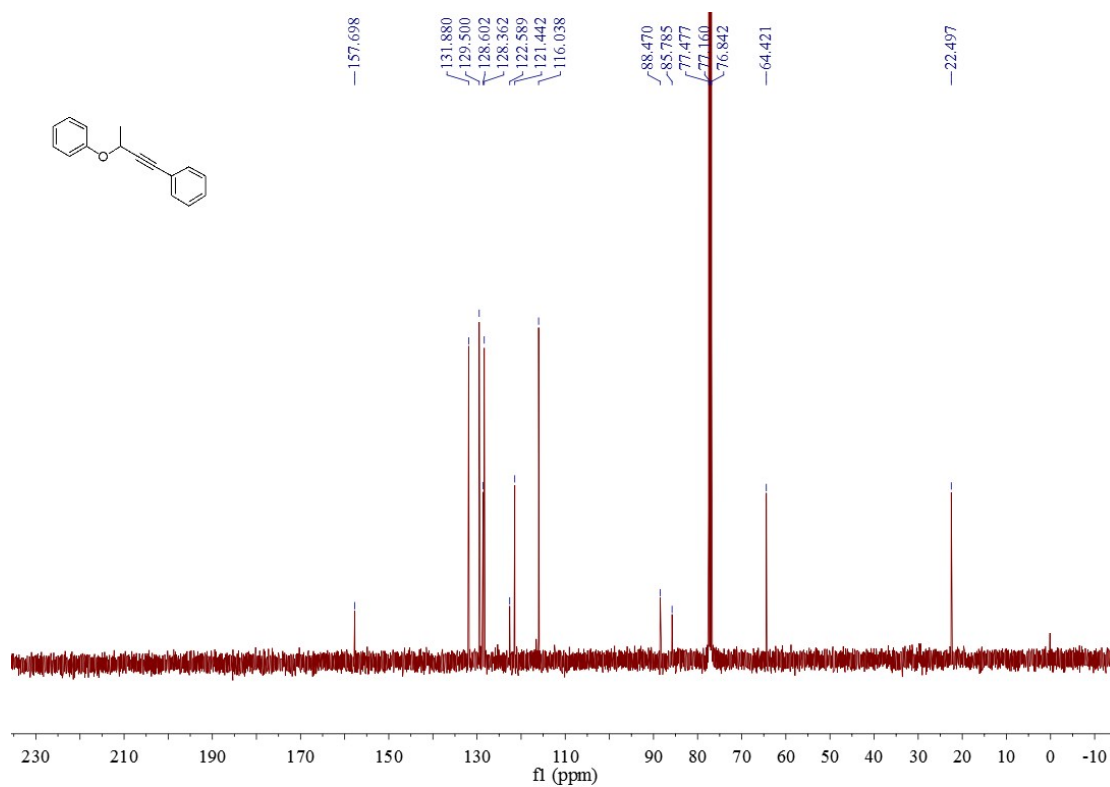

4-methoxy-4'-(4-phenylbut-3-yn-2-yl)-1,1'-biphenyl c15

### <sup>1</sup>H-NMR

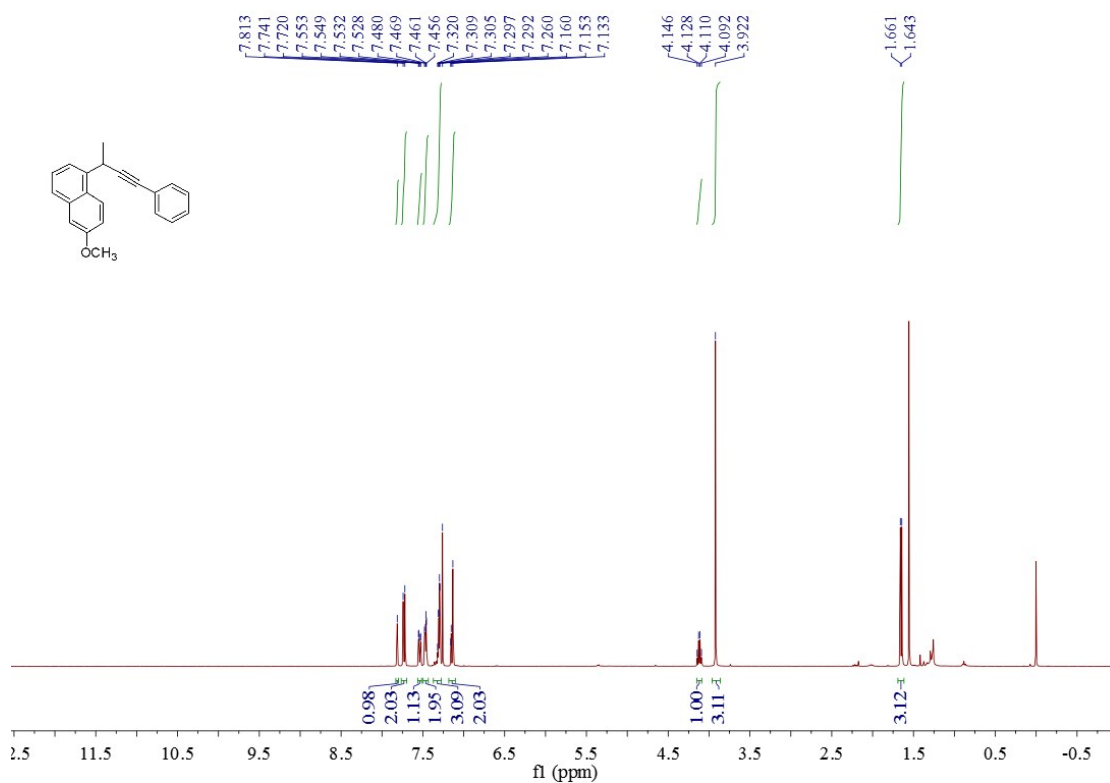

### <sup>13</sup>C-NMR

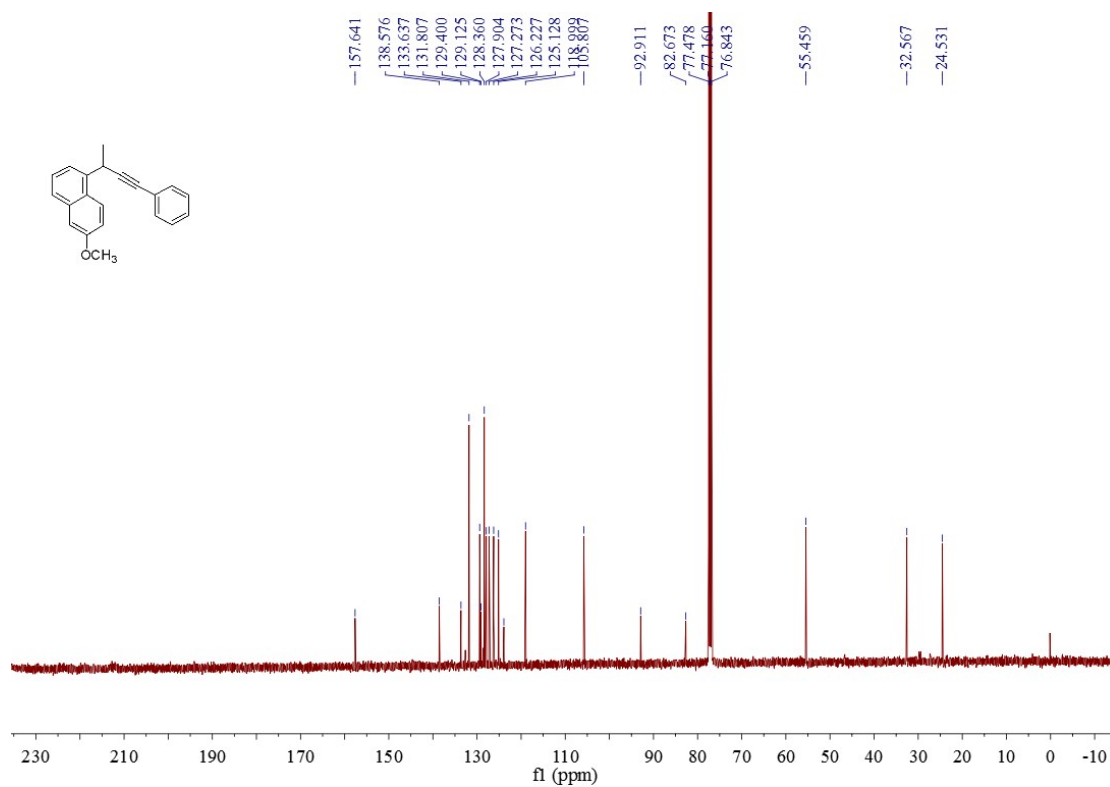

4-(3-methyl-3-phenylbut-1-yn-1-yl)-1,1'-biphenyl c16

### <sup>1</sup>H NMR

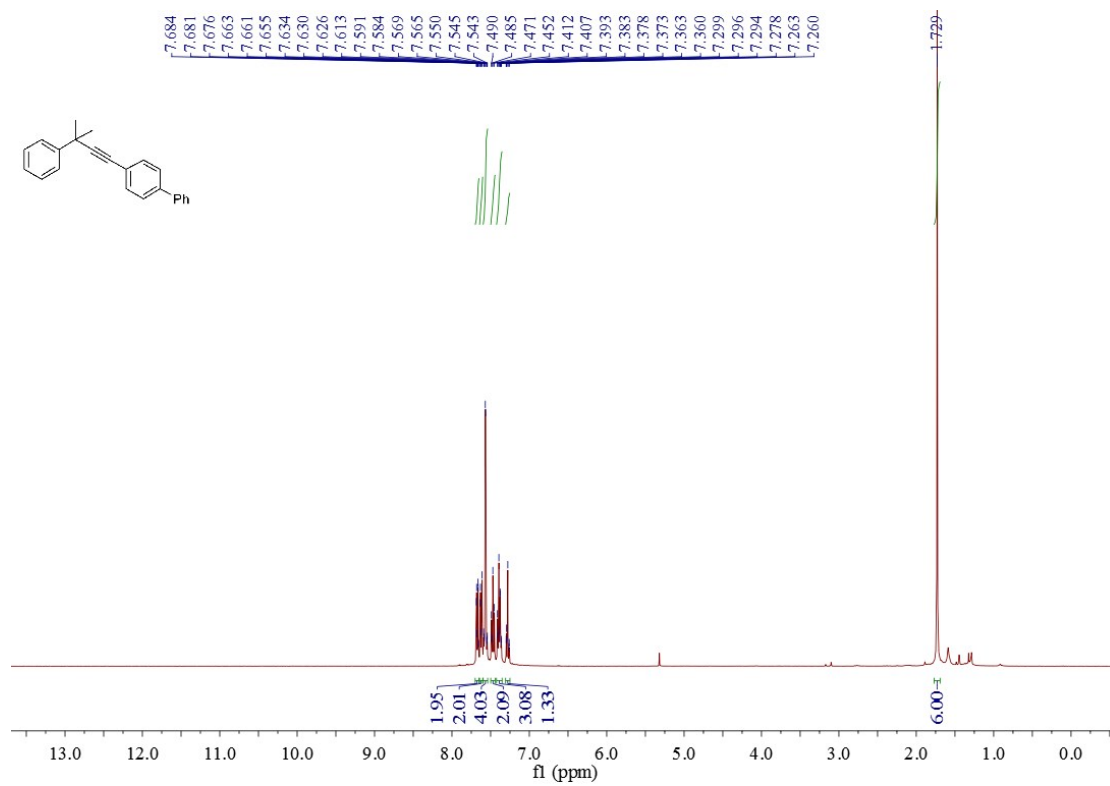

### <sup>13</sup>C NMR

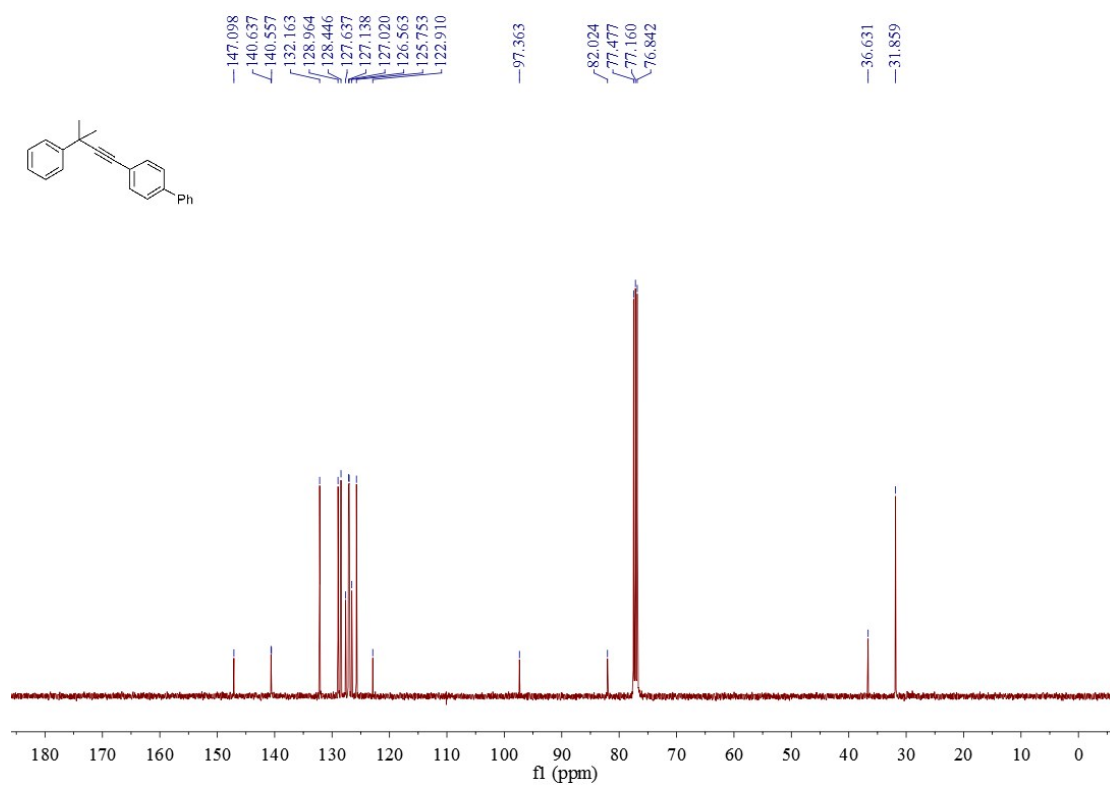

### 4-((1-(p-tolyl)cyclopropyl)ethynyl)-1,1'-biphenyl c17

### <sup>1</sup>H-NMR

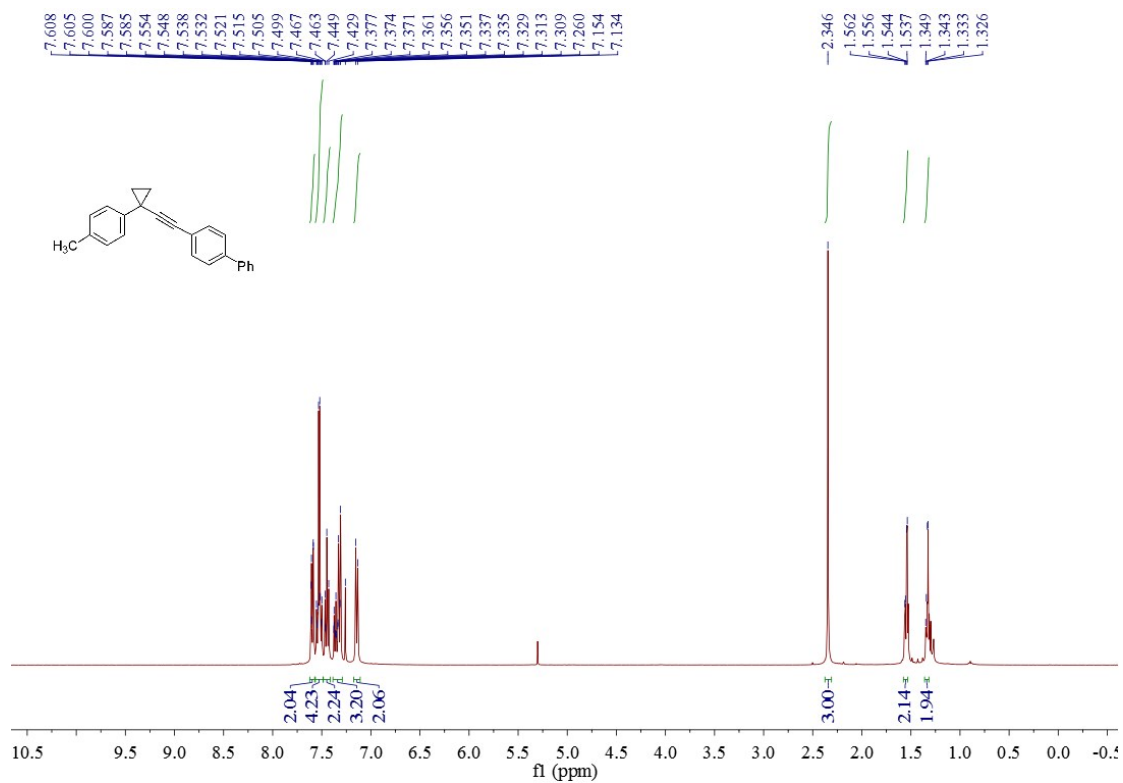

### <sup>13</sup>C-NMR

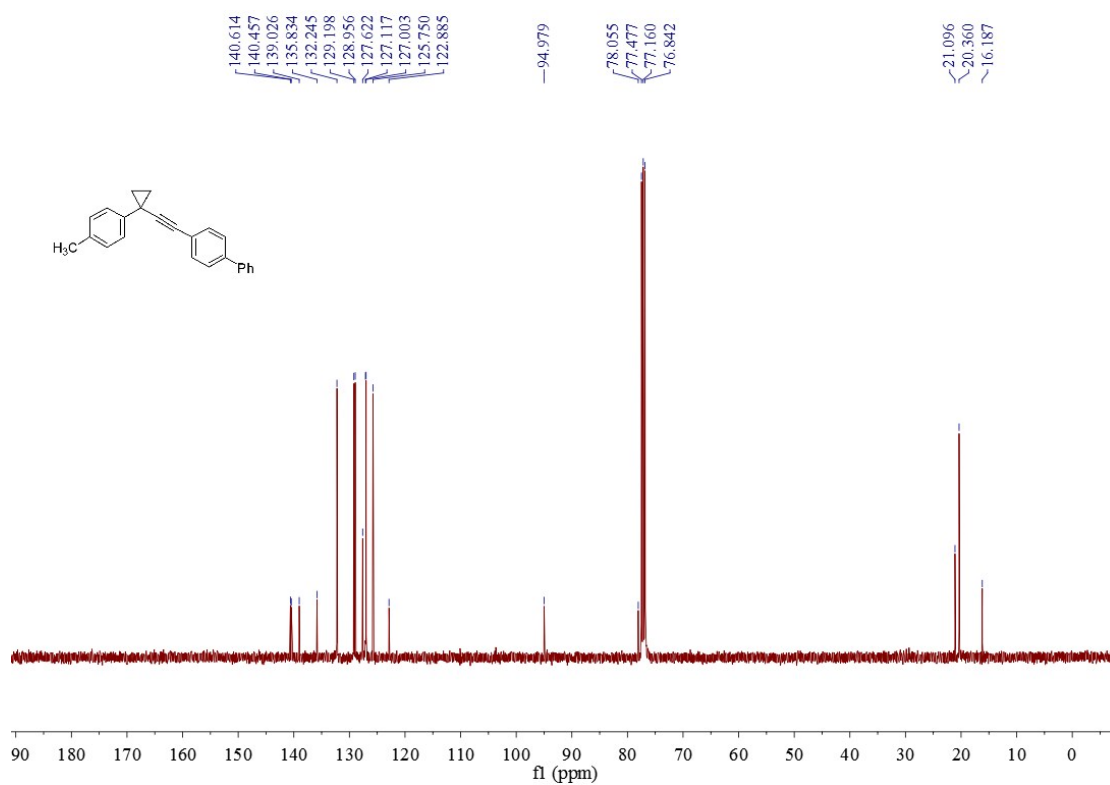

### 1-chloro-2-(3-phenylbut-1-yn-1-yl)benzene (c18)

### <sup>1</sup>H NMR

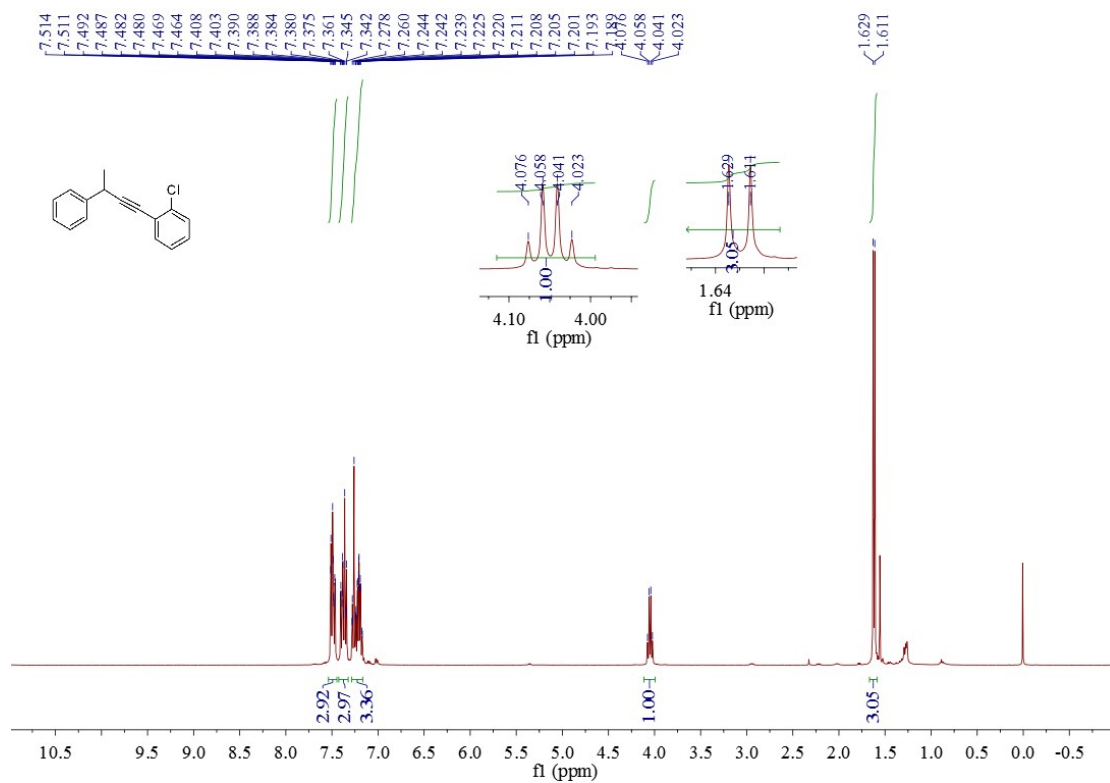

### <sup>13</sup>C NMR

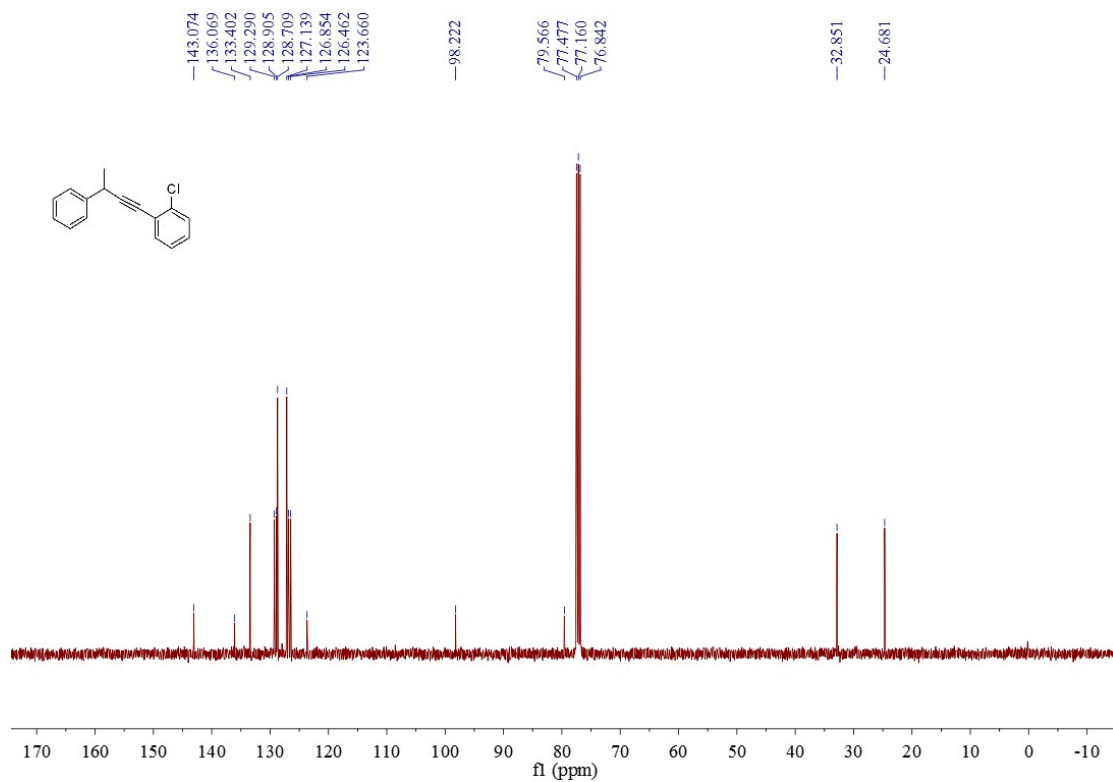

1-methyl-3-(3-phenylbut-1-yn-1-yl)benzene **c19**

<sup>1</sup>H NMR

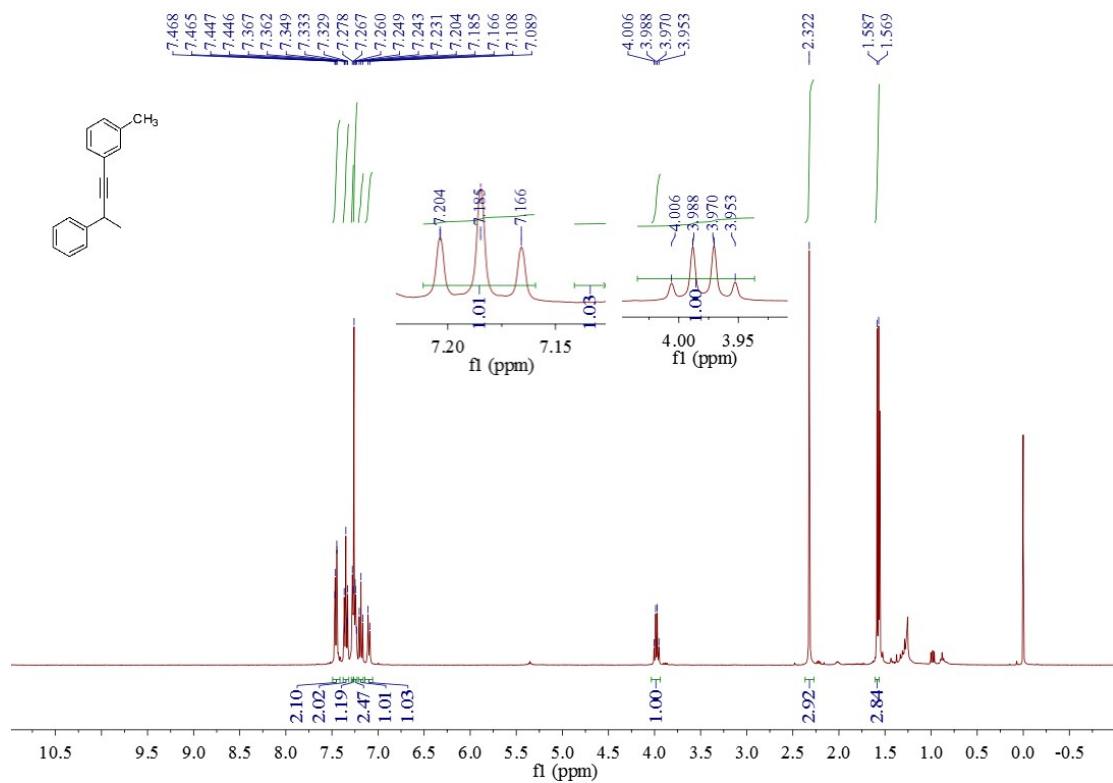

### <sup>13</sup>C NMR

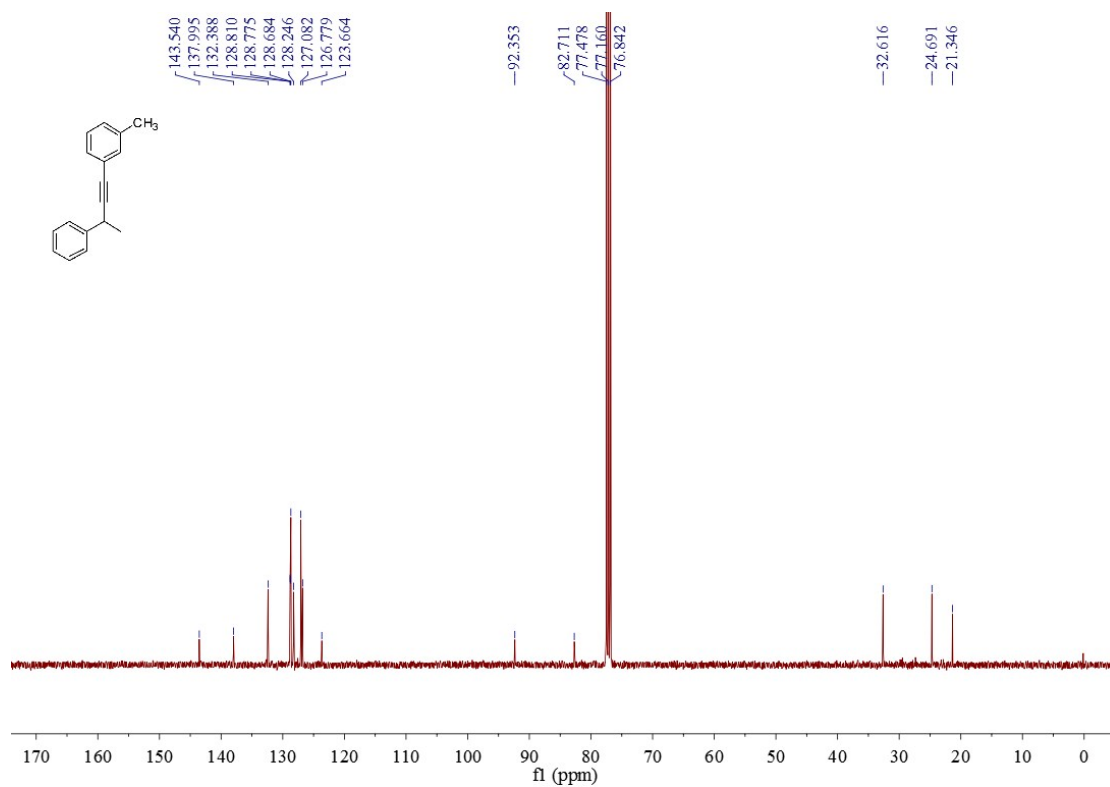

### 4-(3-phenylbut-1-yn-1-yl)-1,1'-biphenyl c20

### <sup>1</sup>H NMR

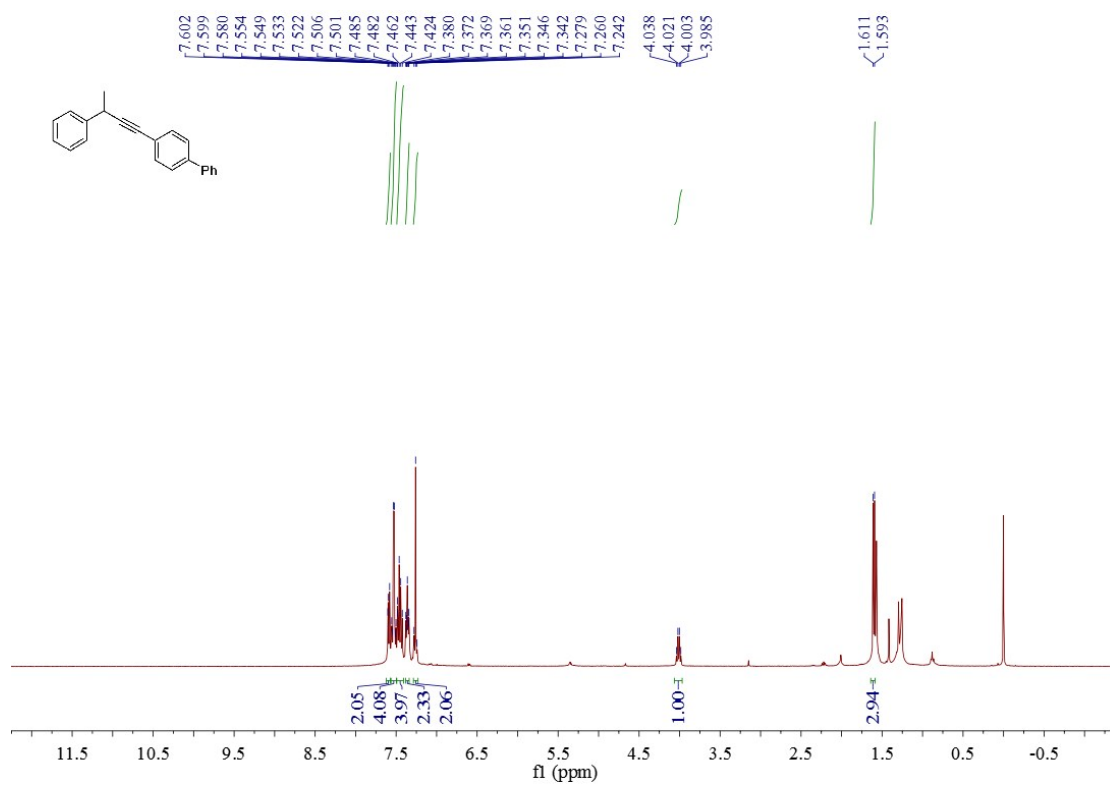

### <sup>13</sup>C NMR

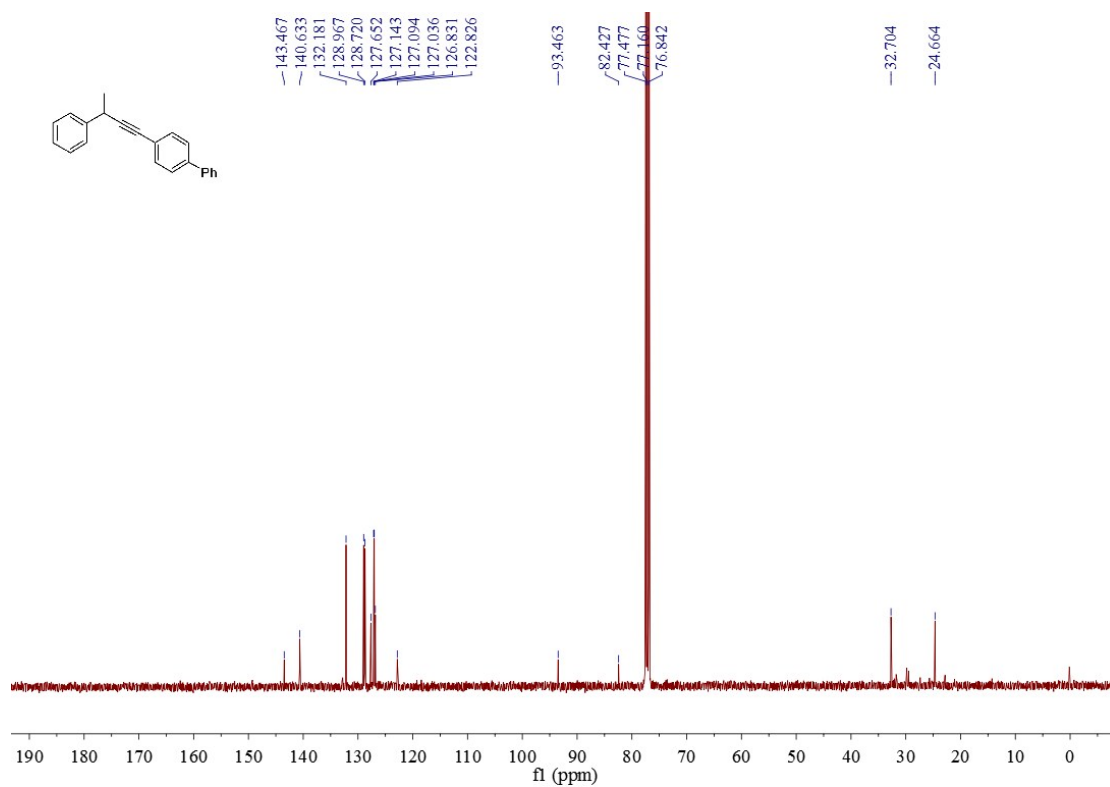

### 1-chloro-4-(3-phenylprop-1-yn-1-yl)benzene c21

### <sup>1</sup>H NMR

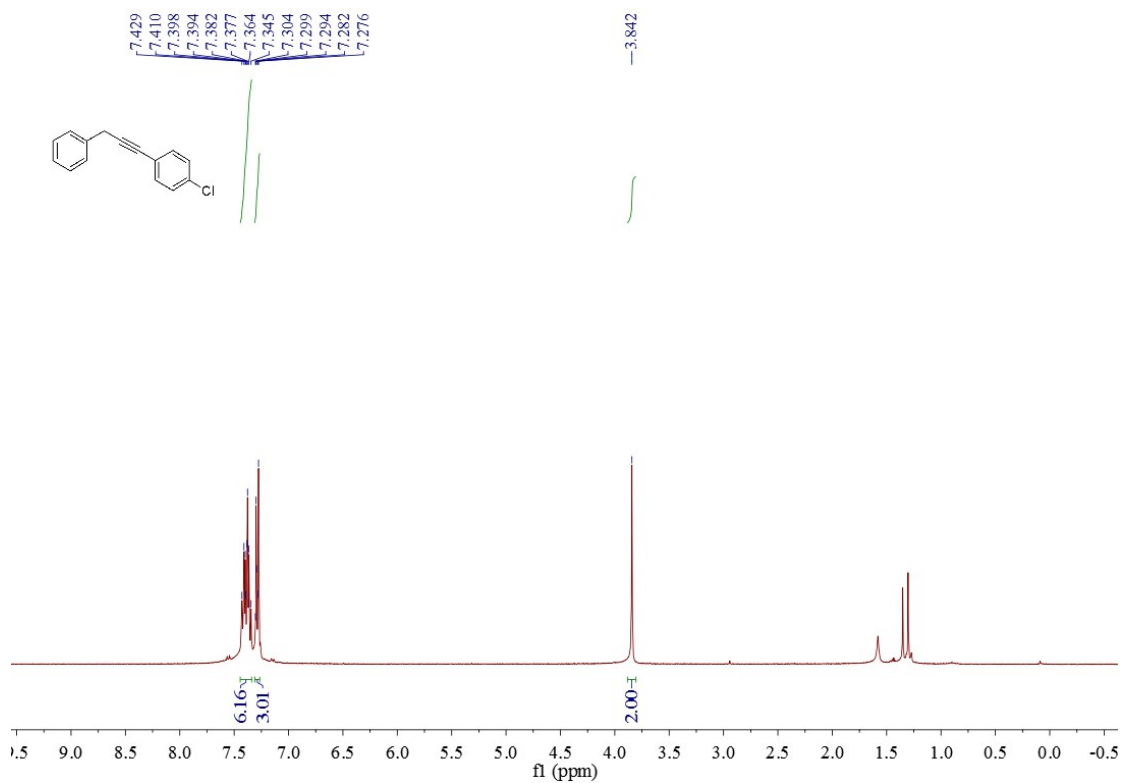

### <sup>13</sup>C NMR

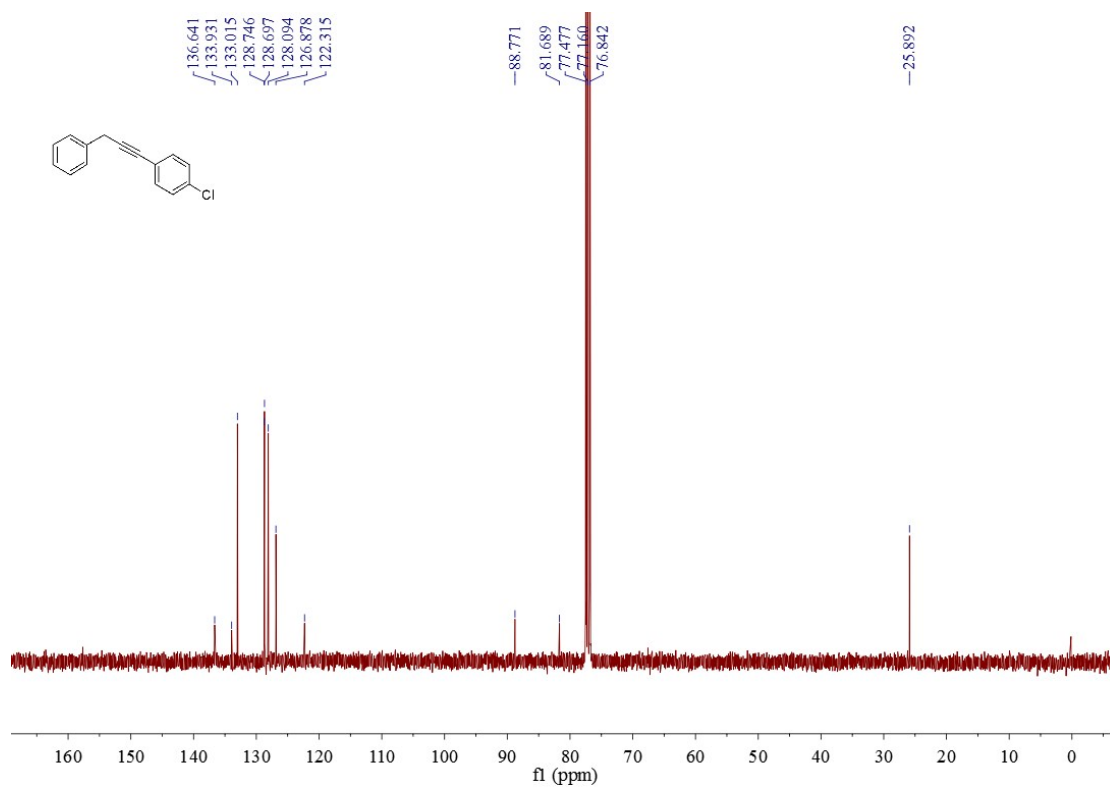

1-bromo-4-(3-phenylprop-1-yn-1-yl)benzene **c22**

<sup>1</sup>H NMR

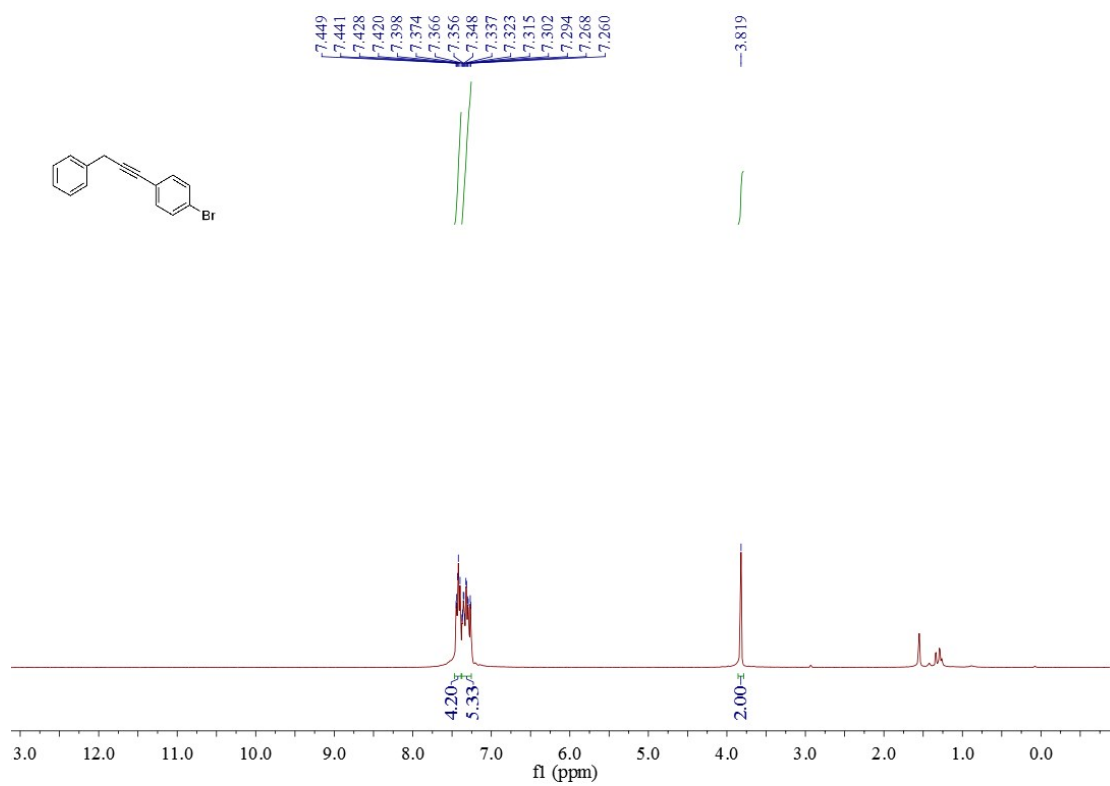

<sup>13</sup>C NMR



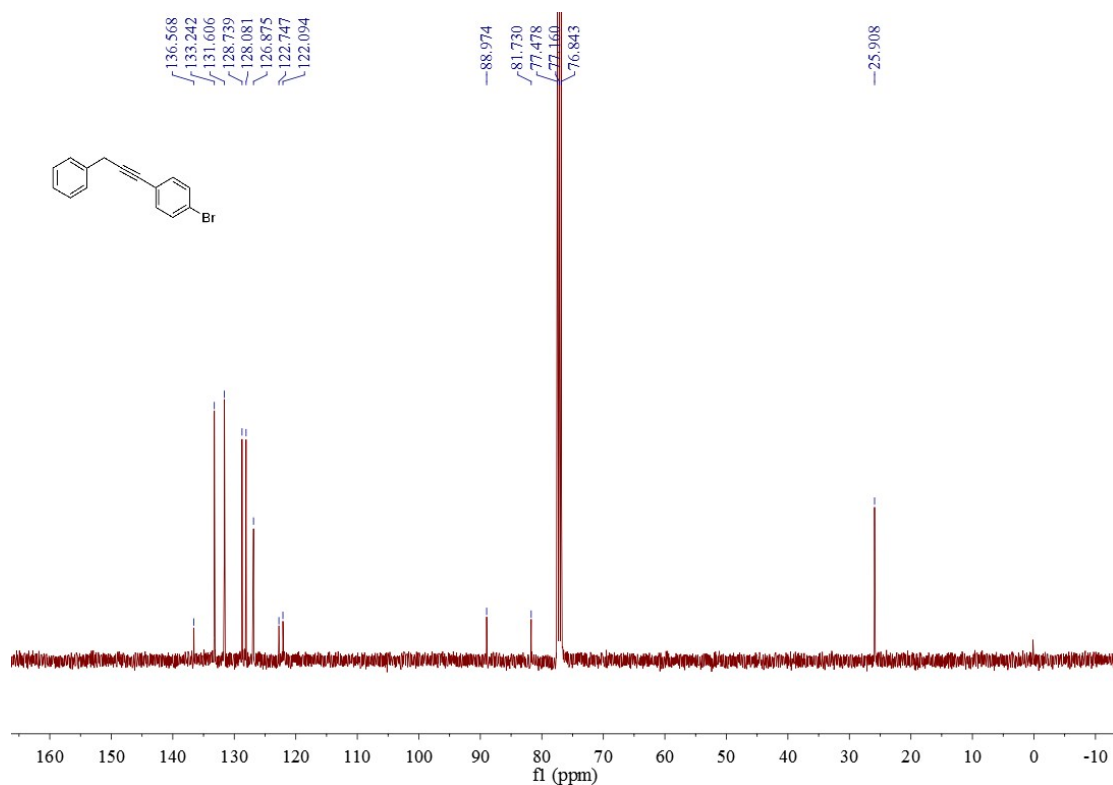

### 6-methoxy-1-(3-phenylbut-1-yn-1-yl)naphthalene **c23**

#### <sup>1</sup>H NMR

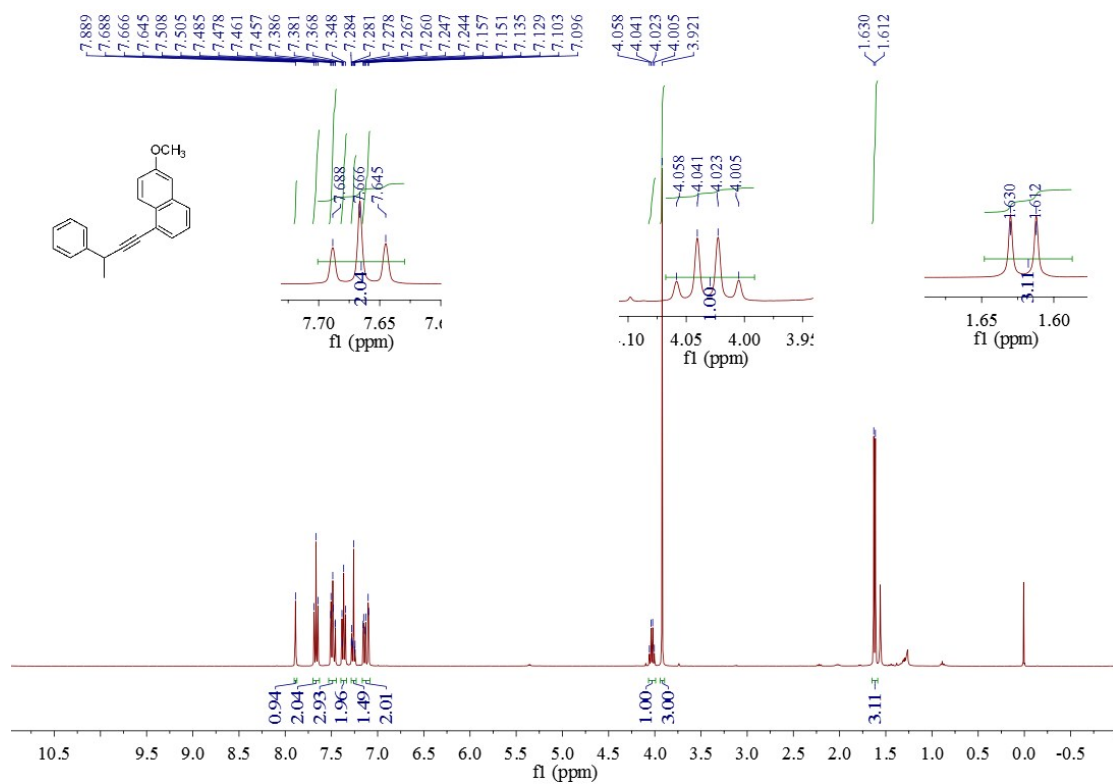

### <sup>13</sup>C NMR

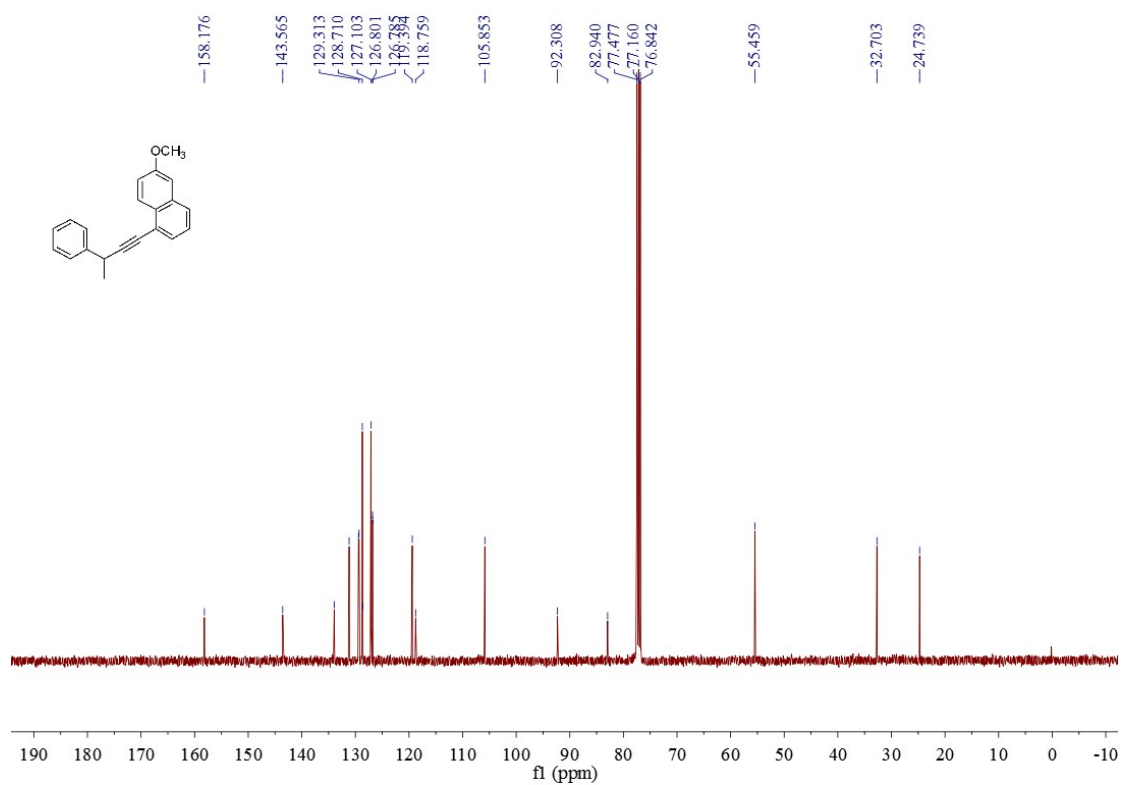

4-(3-((1,1'-biphenyl)-4-yl)prop-1-yn-1-yl)benzonitrile c24

### <sup>1</sup>H NMR

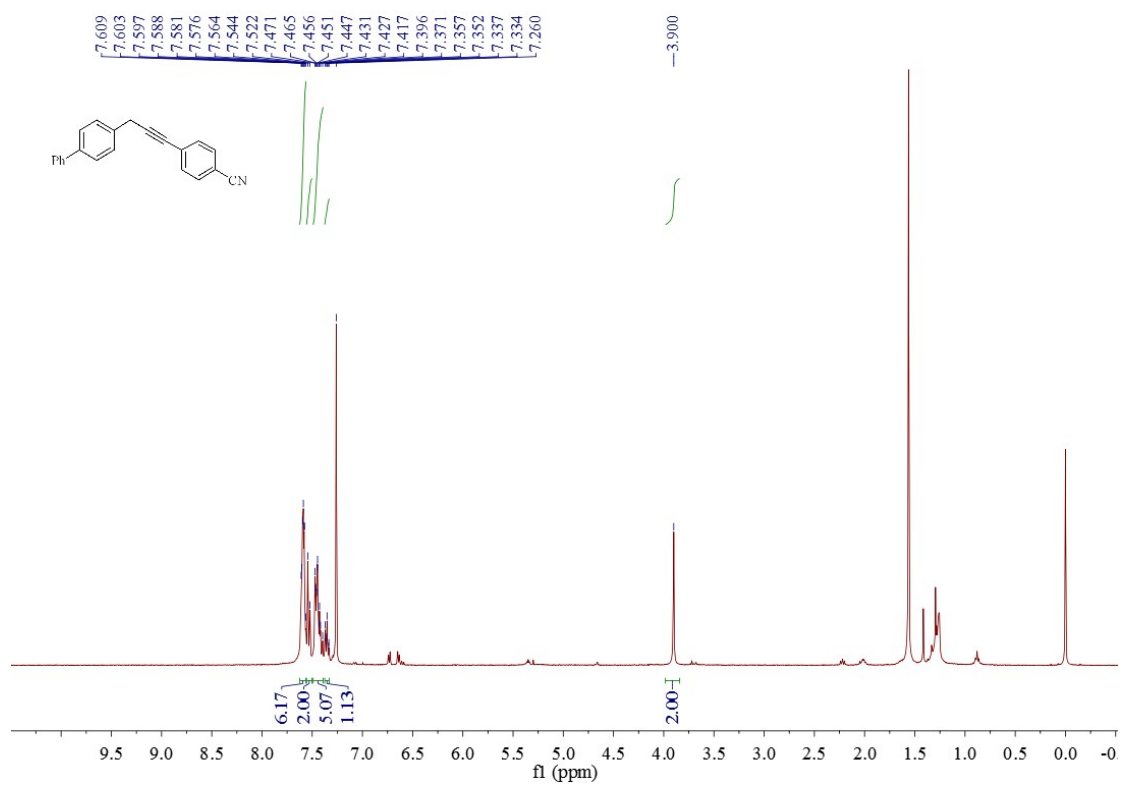

### <sup>13</sup>C NMR

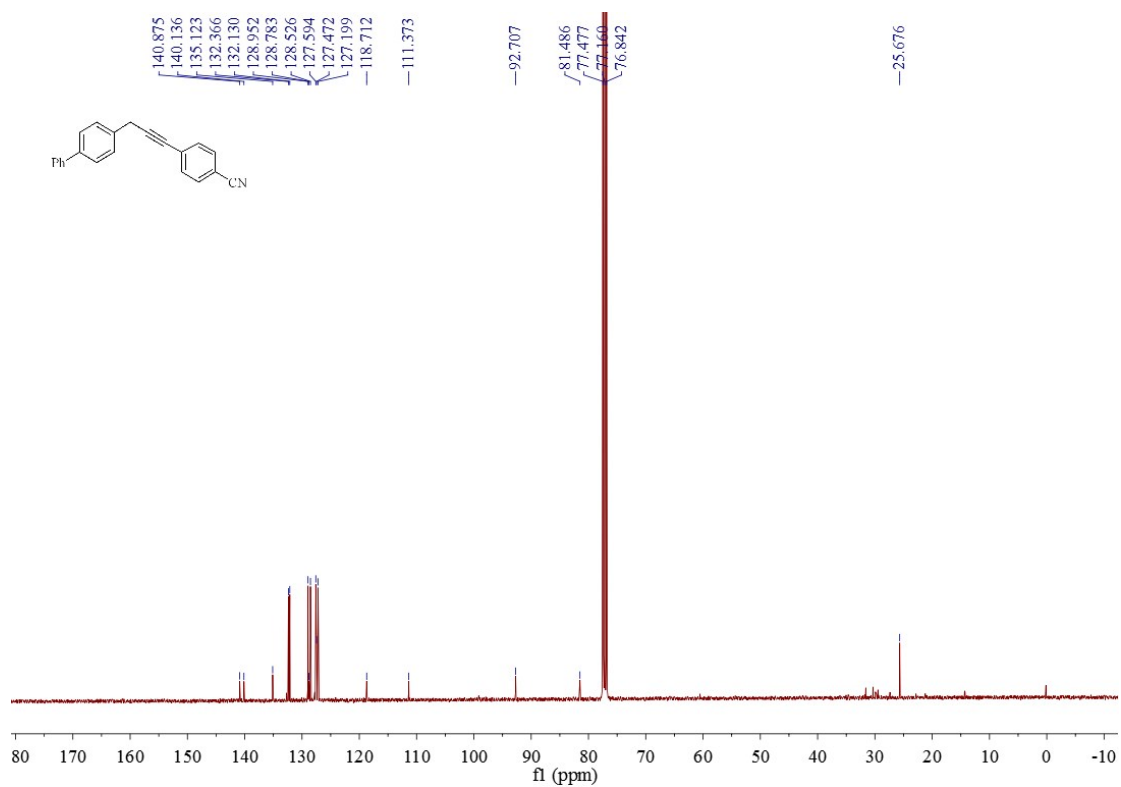

### 4-(3-(4-(tert-butyl)phenyl)prop-2-yn-1-yl)-1,1'-biphenyl c25

### <sup>1</sup>H NMR

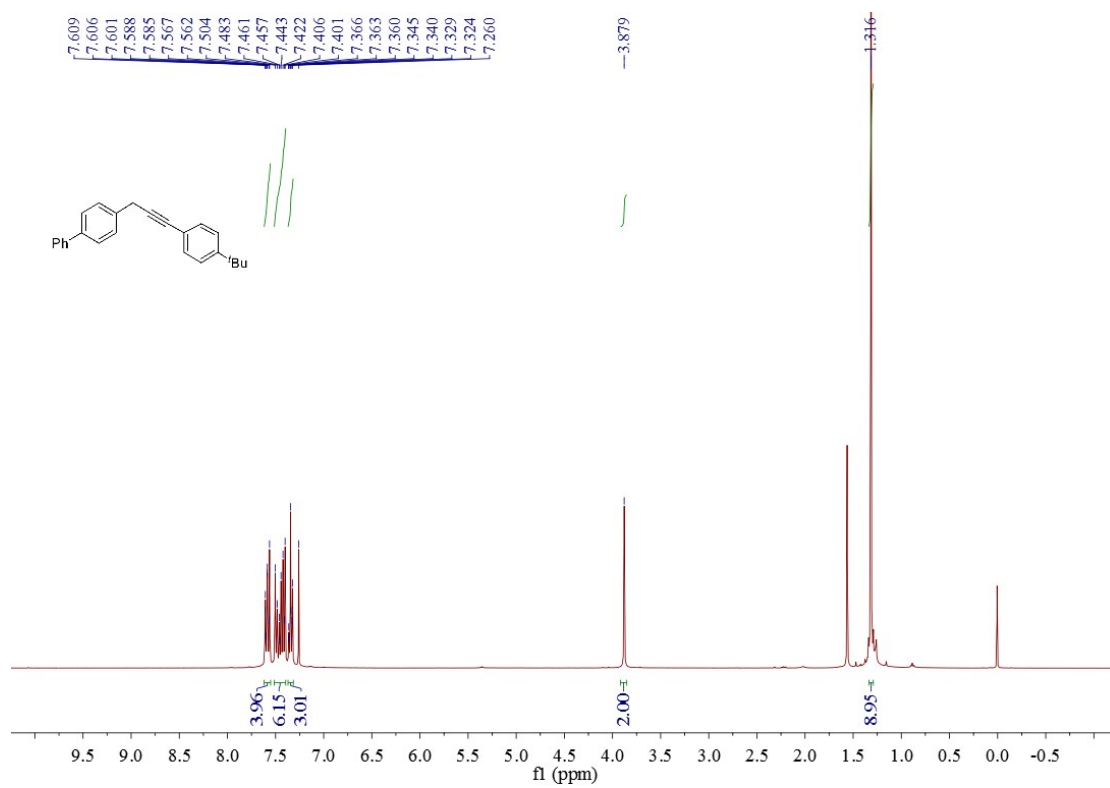

### <sup>13</sup>C NMR

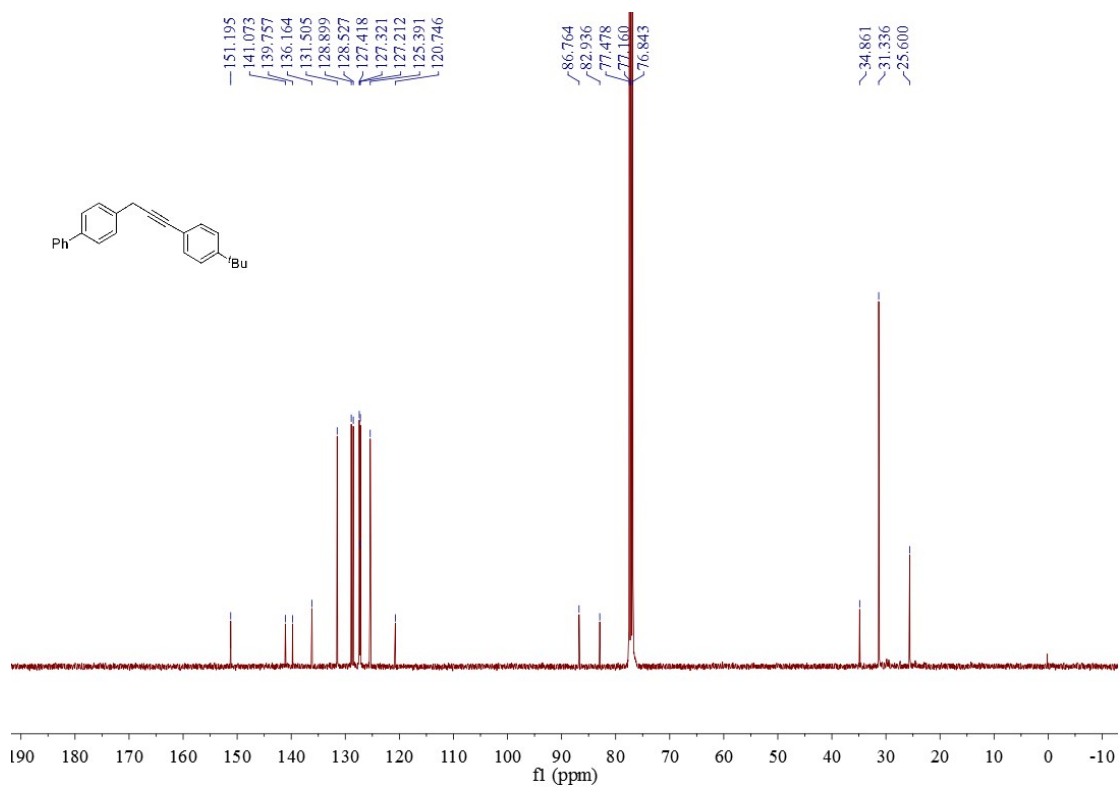

### 2-(3-phenylbut-1-yn-1-yl)thiophene c26

### <sup>1</sup>H NMR

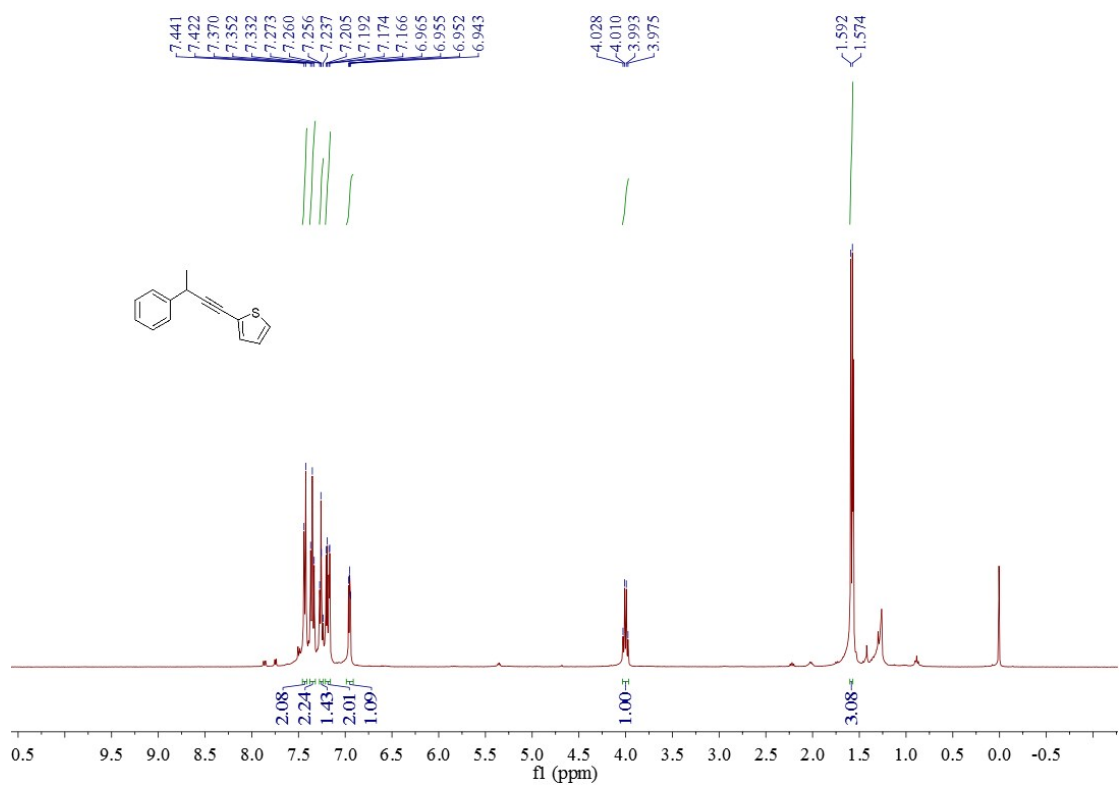

### <sup>13</sup>C NMR

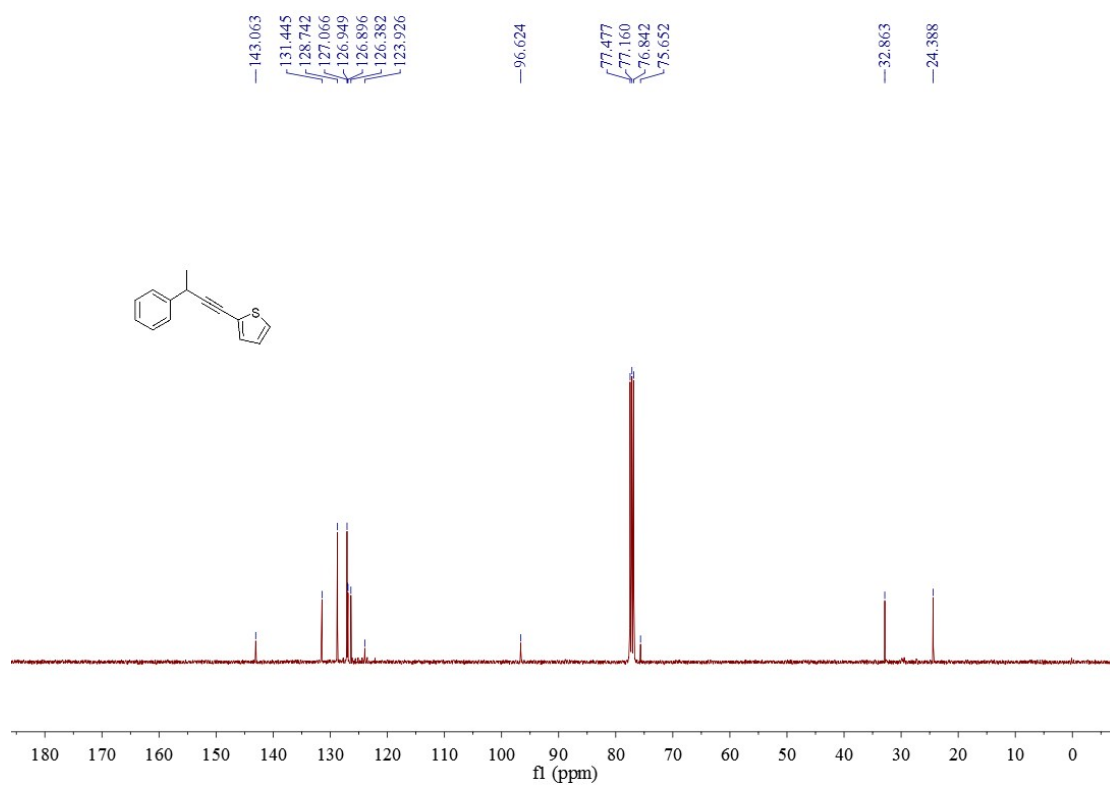

### 3-(3-phenylbut-1-yn-1-yl)pyridine **c27**

#### <sup>1</sup>H NMR

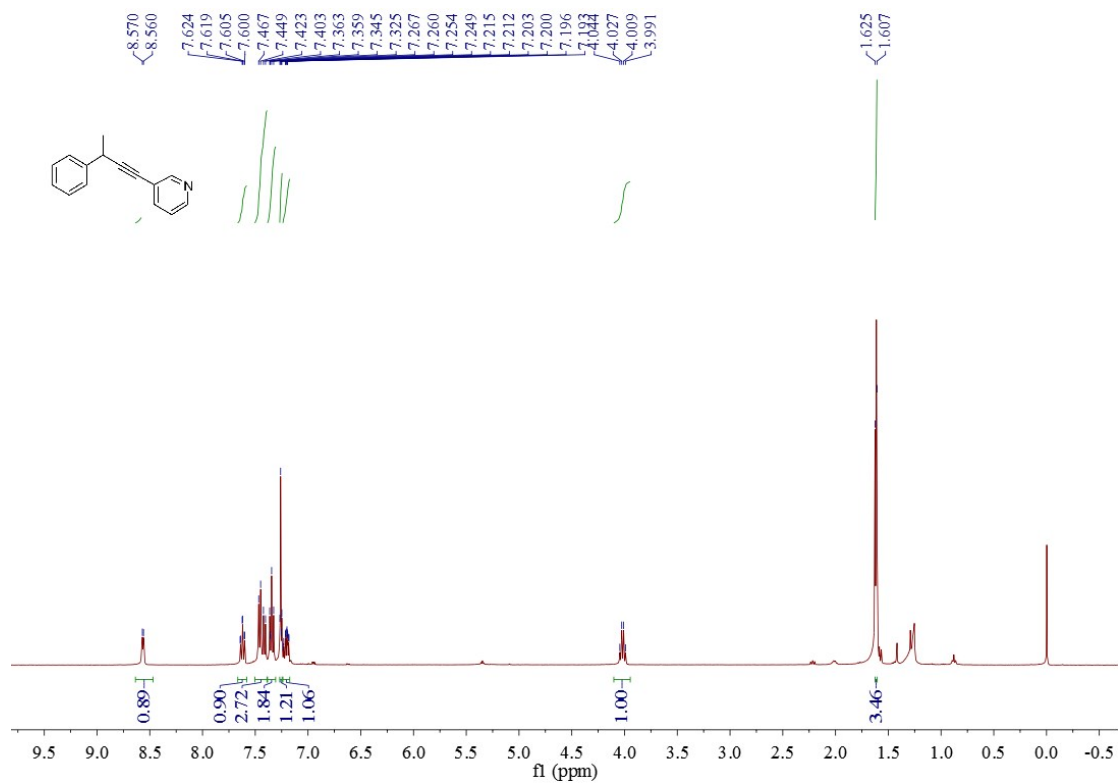

### <sup>13</sup>C NMR

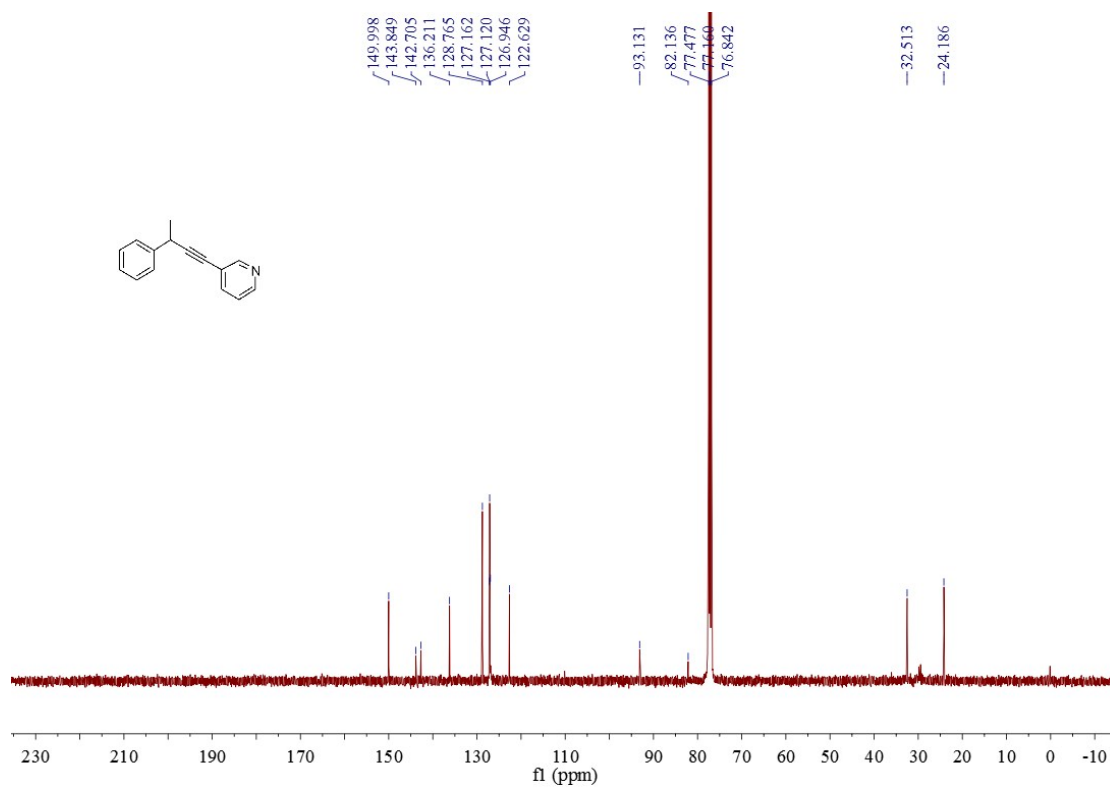

### 4-(3-(4-methoxyphenyl)prop-2-yn-1-yl)-1,1'-biphenyl c28

### <sup>1</sup>H NMR

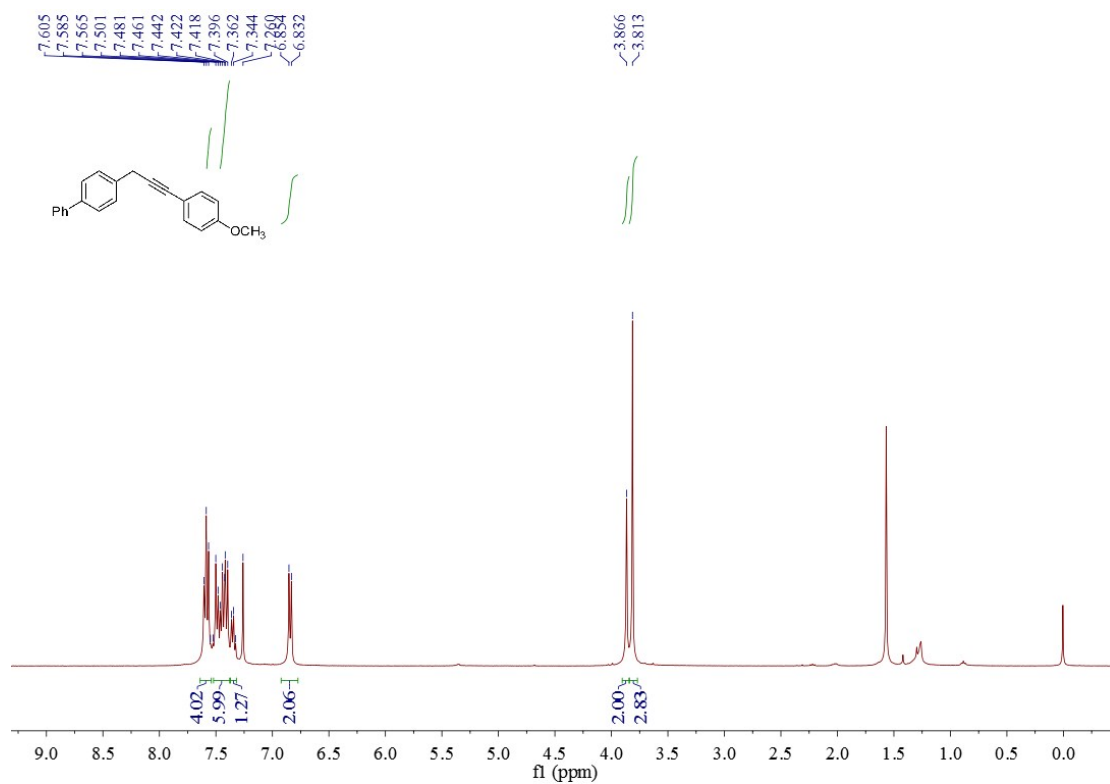

### <sup>13</sup>C NMR

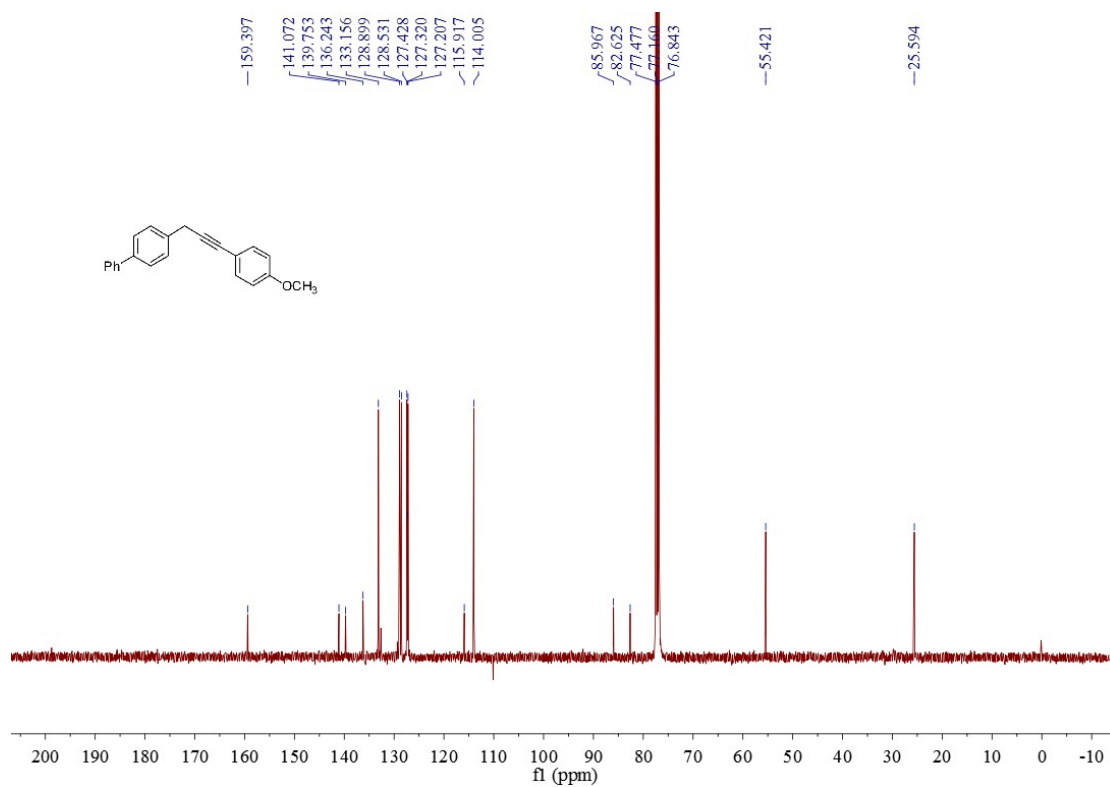

(3-([1,1'-biphenyl]-4-yl)prop-1-yn-1-yl)trimethylsilane **c29**

### <sup>1</sup>H NMR

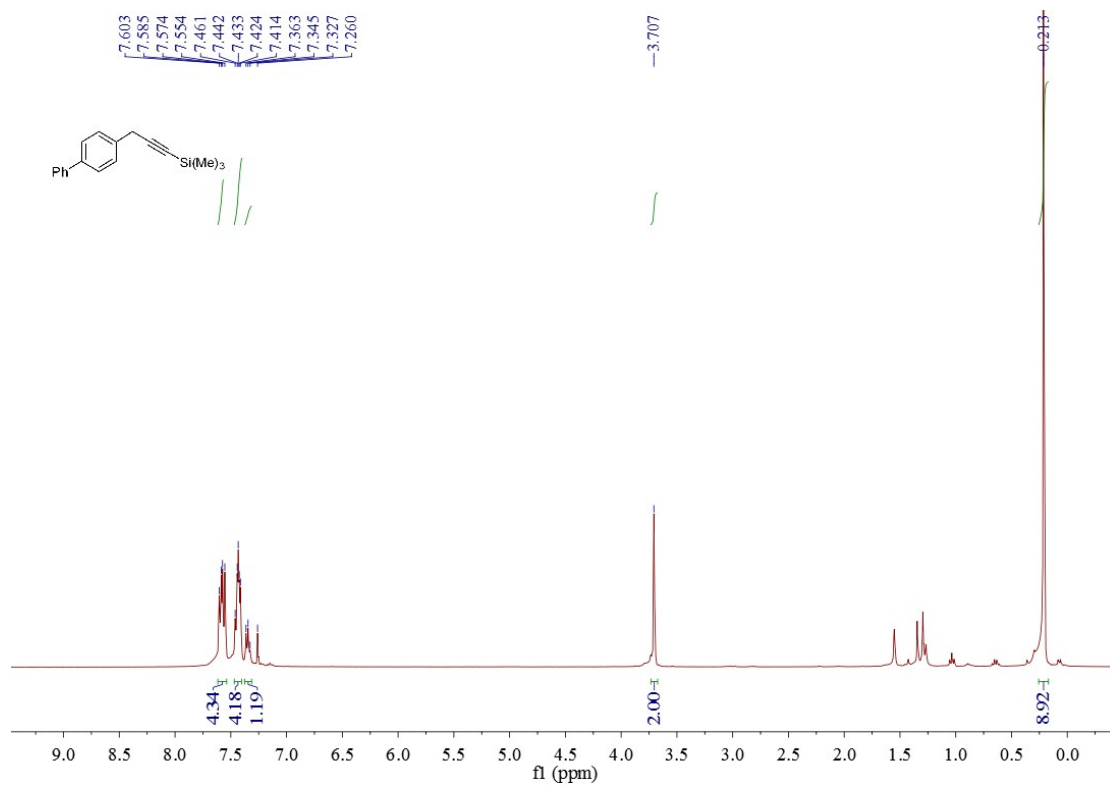

### <sup>13</sup>C NMR

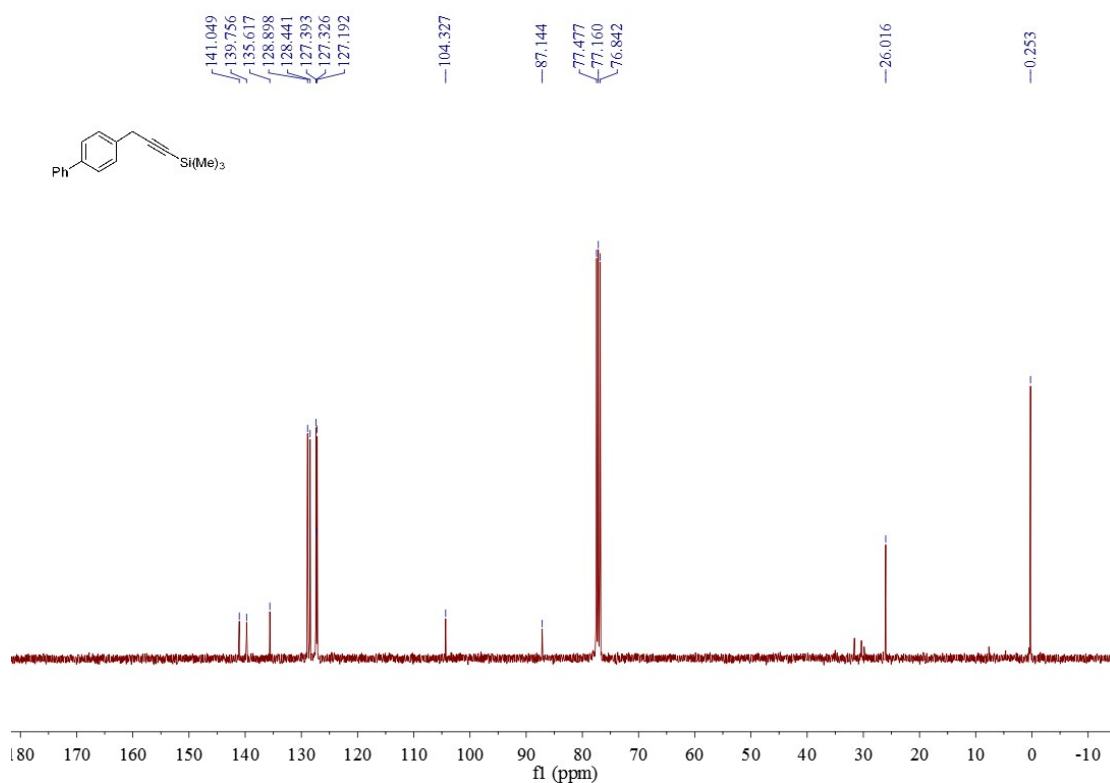

### 3-((1,1'-biphenyl)-4-yl)prop-1-yn-1-yltriethylsilane c30

### <sup>1</sup>H NMR

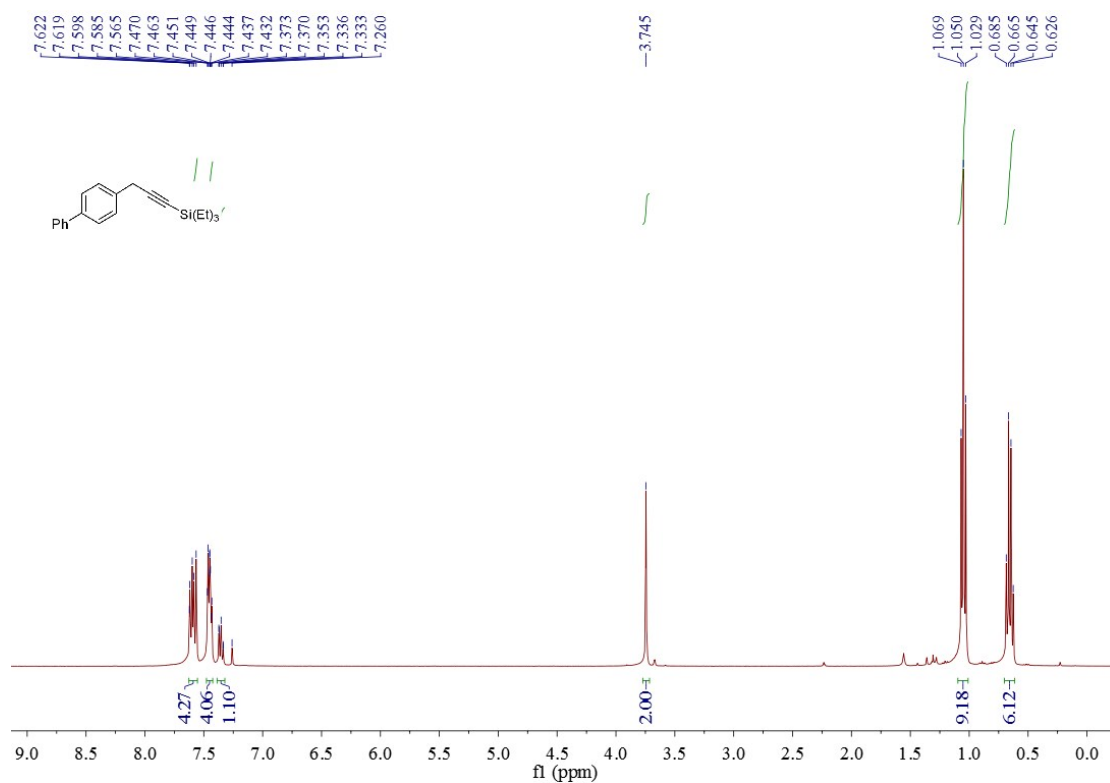



### <sup>13</sup>C NMR

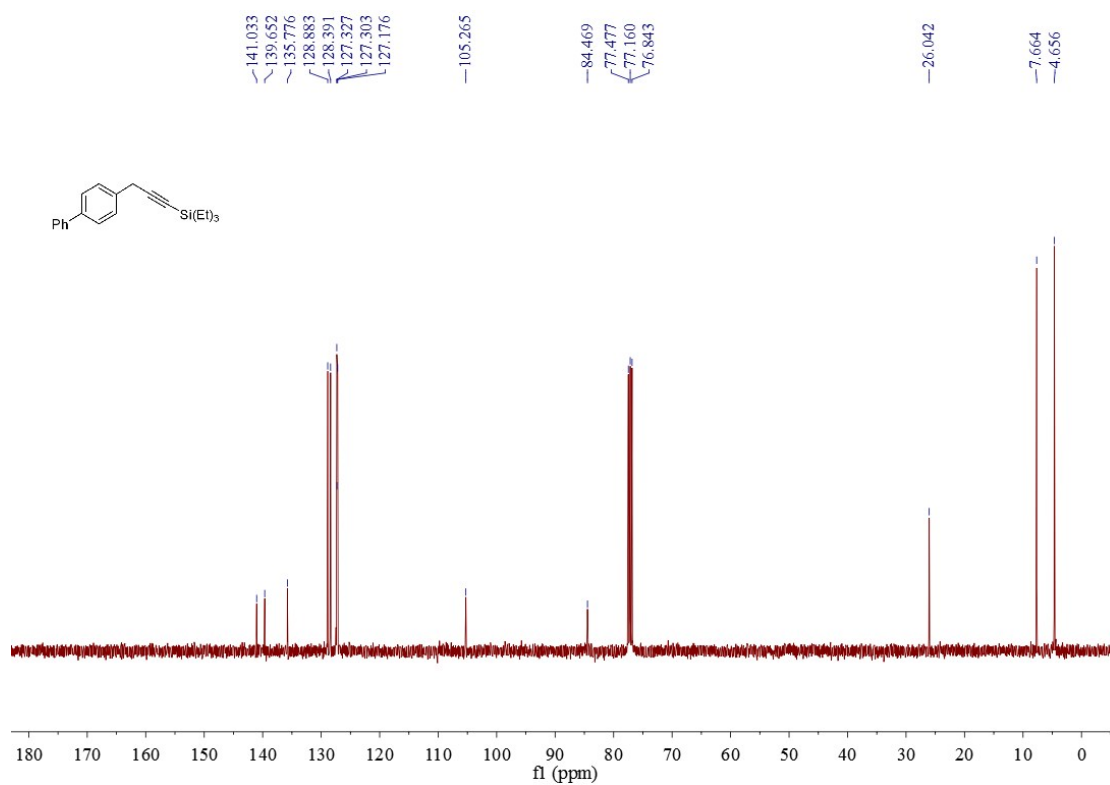

(3-([1,1'-biphenyl]-4-yl)prop-1-yn-1-yl)triisopropylsilane **c31**

### <sup>1</sup>H NMR

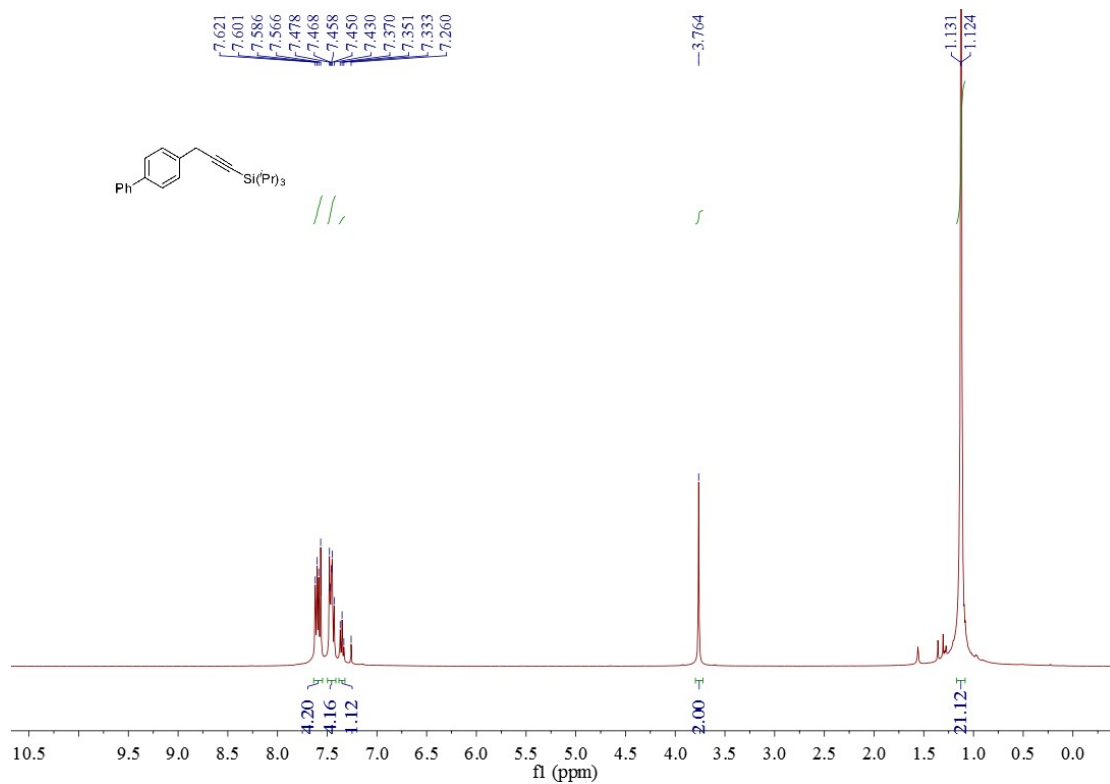

### <sup>13</sup>C NMR

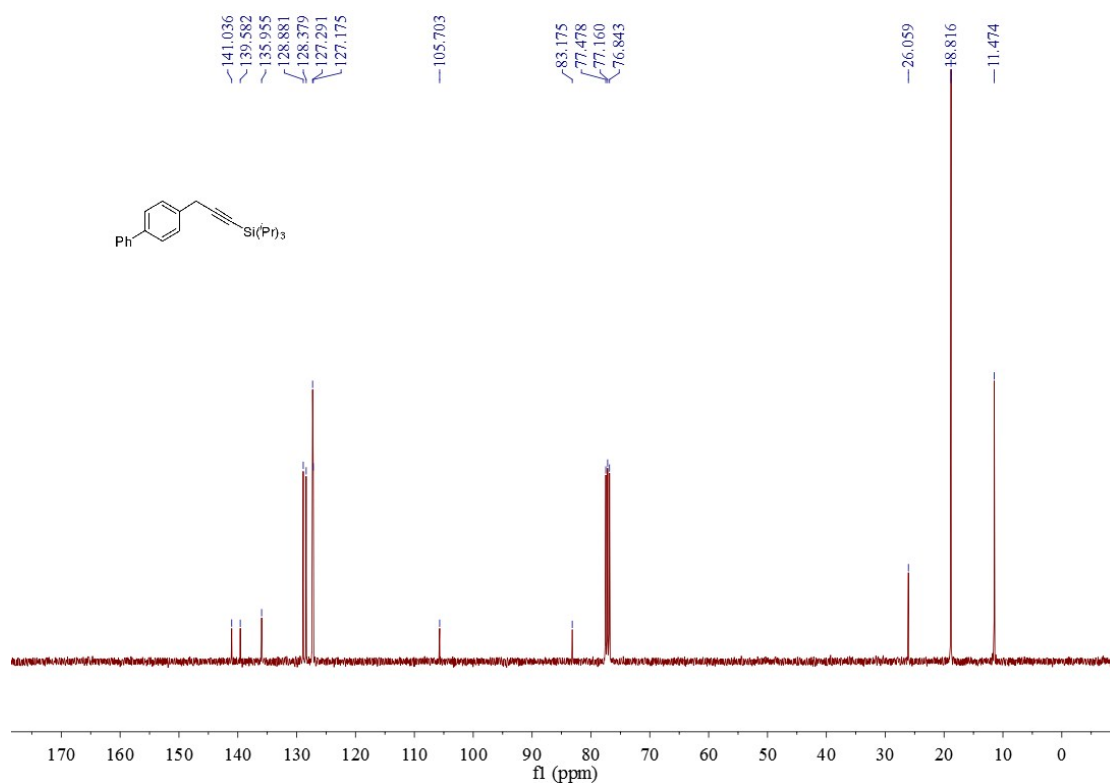

### 4-(5-methylhex-2-yn-1-yl)-1,1'-biphenyl **c32**

### <sup>1</sup>H NMR

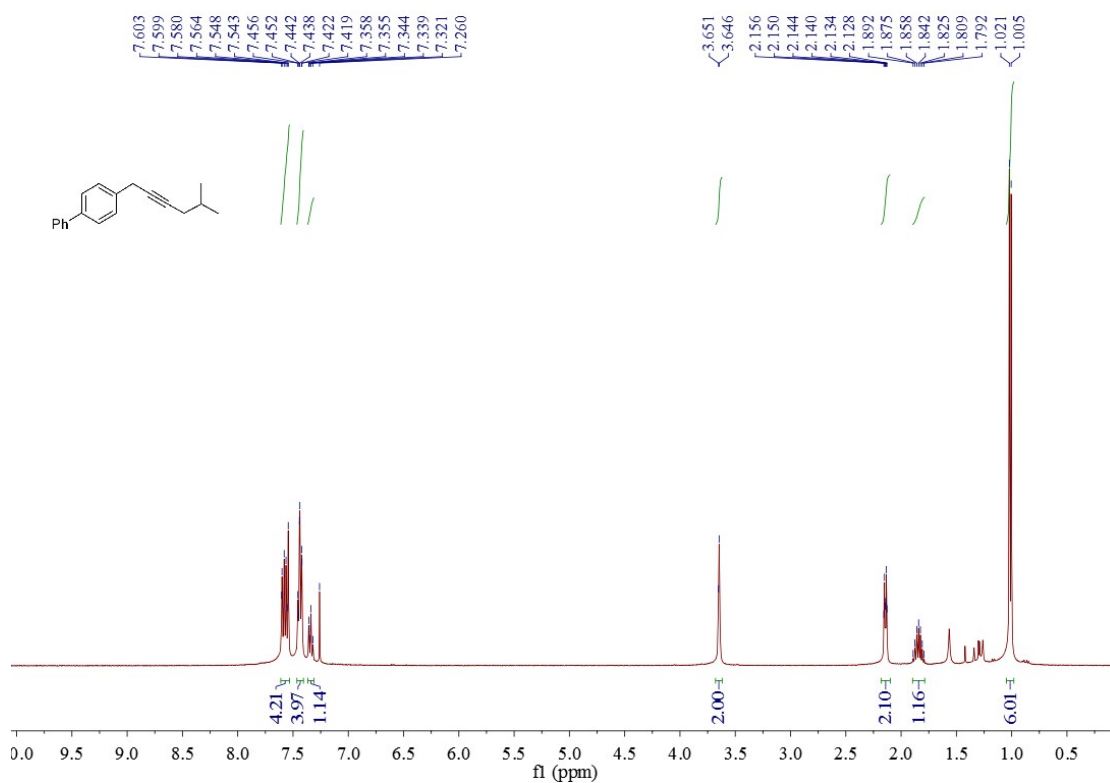

### <sup>13</sup>C NMR

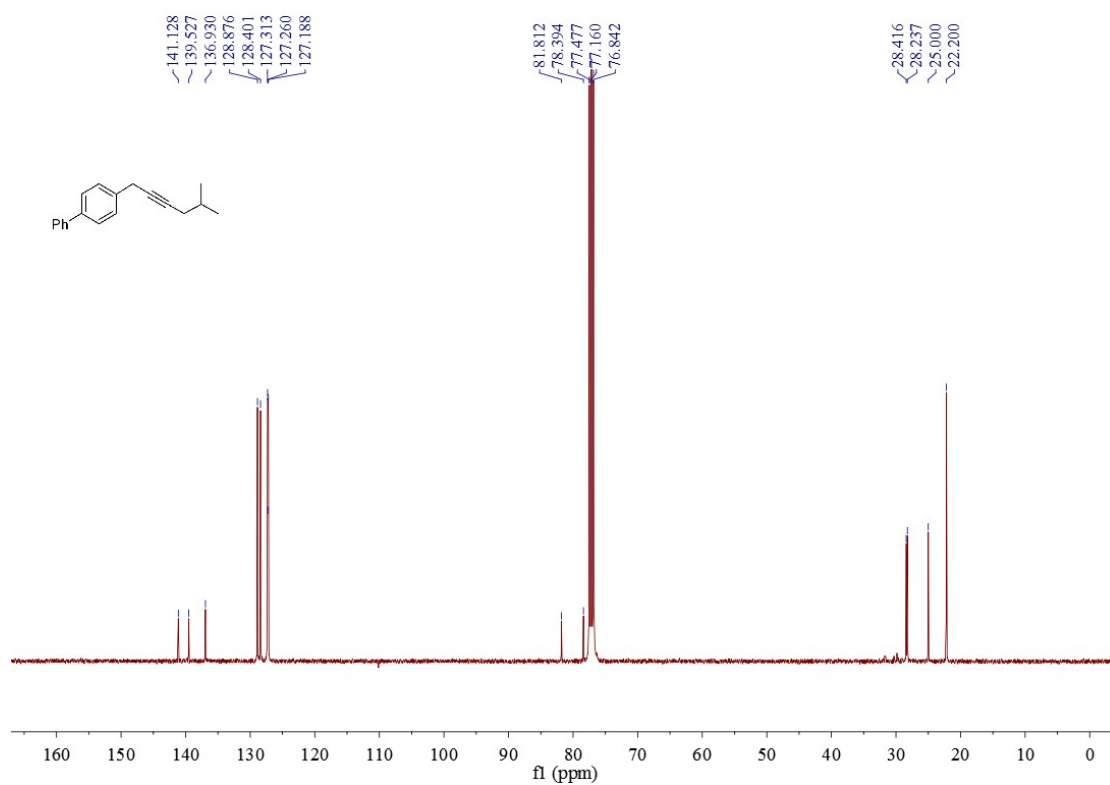

4-(hex-2-yn-1-yl)-1,1'-biphenyl c33

### <sup>1</sup>H NMR

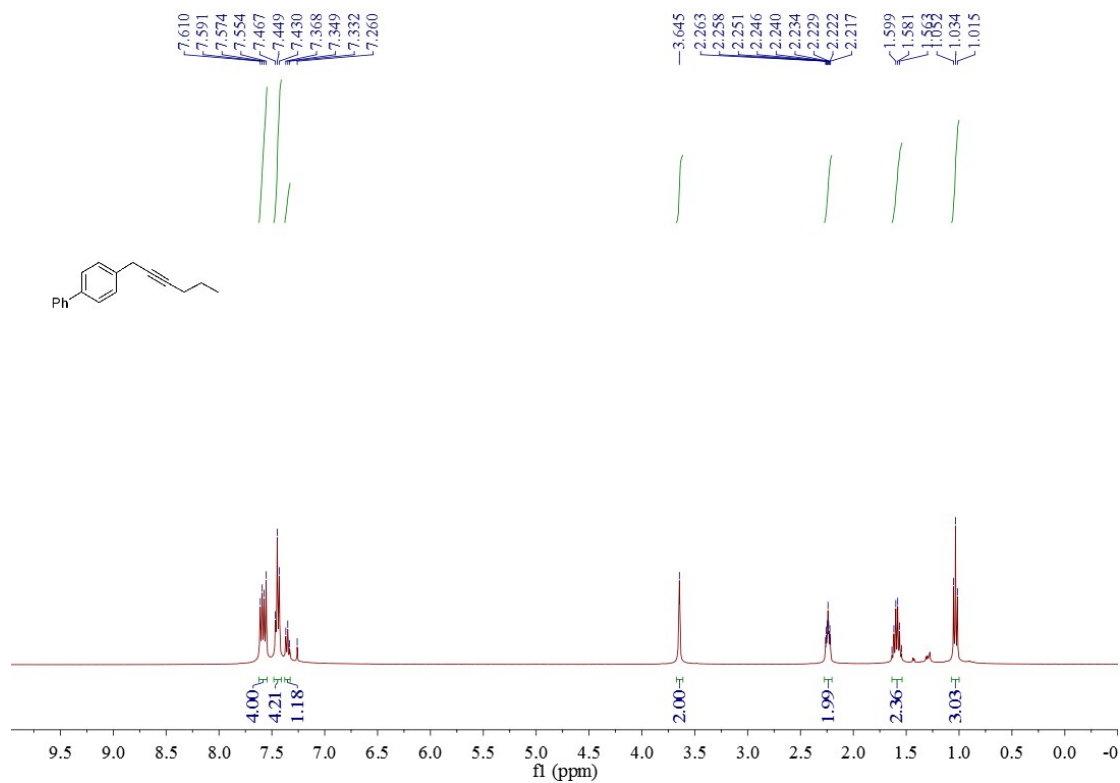

### <sup>13</sup>C NMR

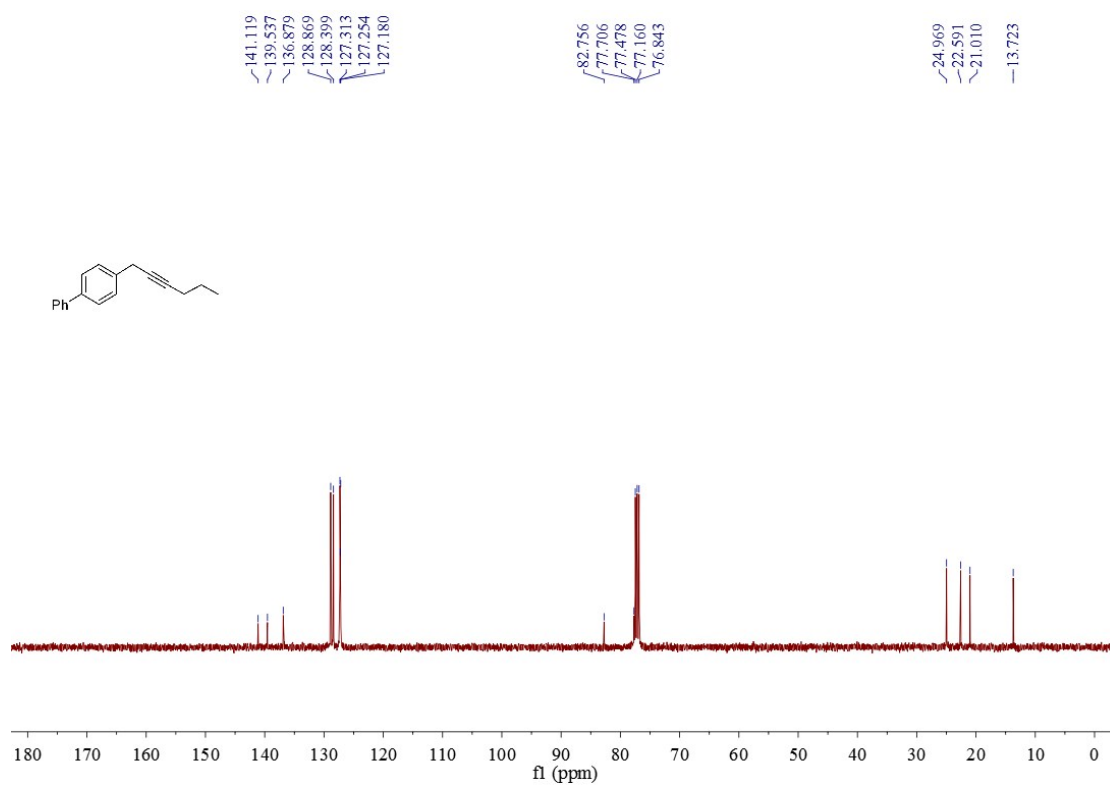

### 4-(hept-2-yn-1-yl)-1,1'-biphenyl **c34**

#### <sup>1</sup>H NMR

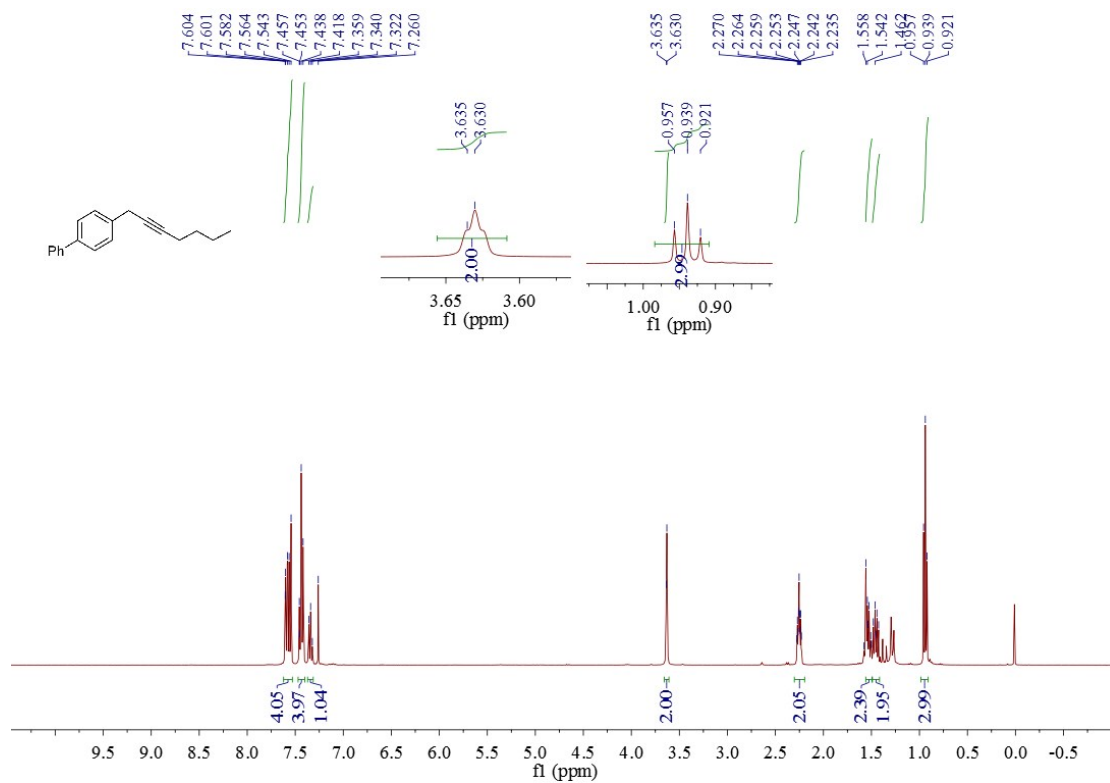

### <sup>13</sup>C NMR

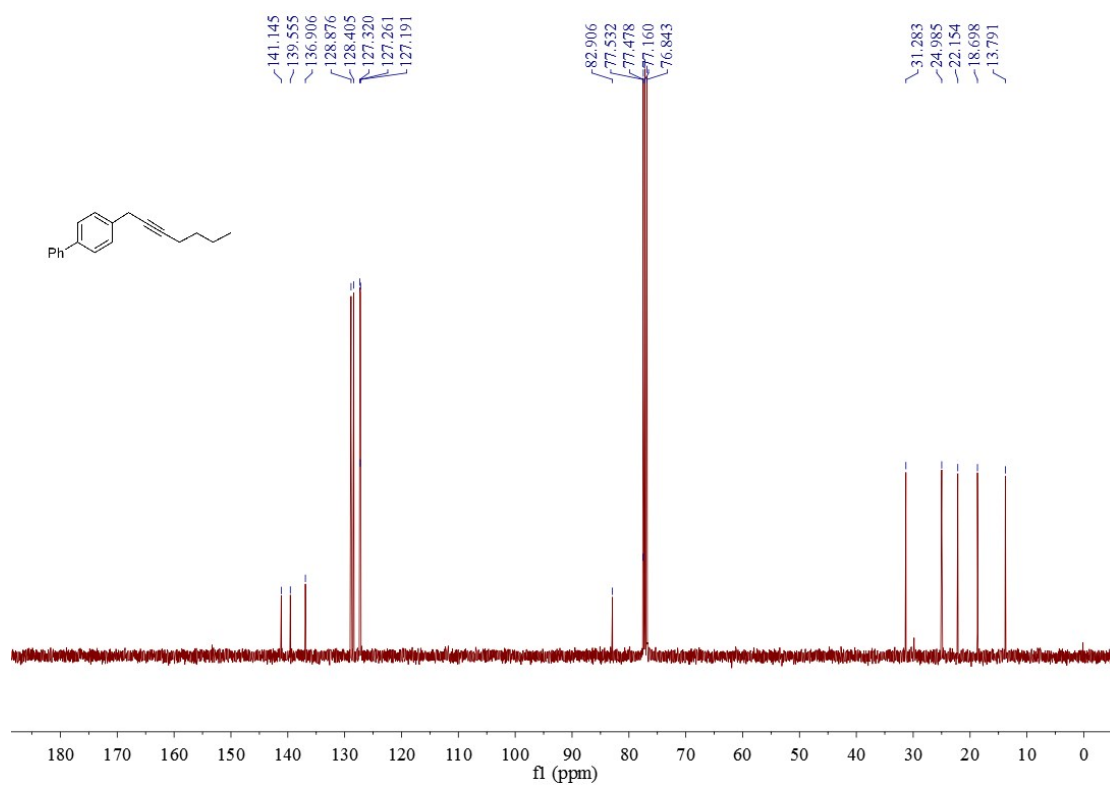

### 4-(oct-2-yn-1-yl)-1,1'-biphenyl c35

### <sup>1</sup>H NMR

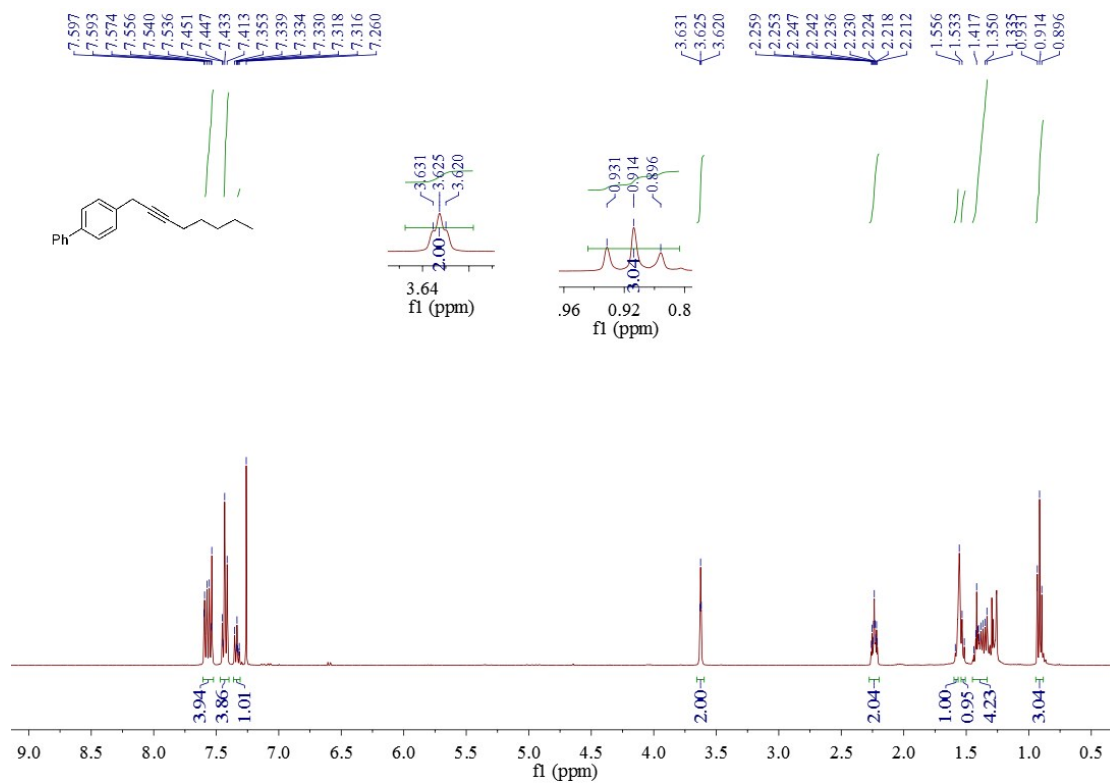

### <sup>13</sup>C NMR

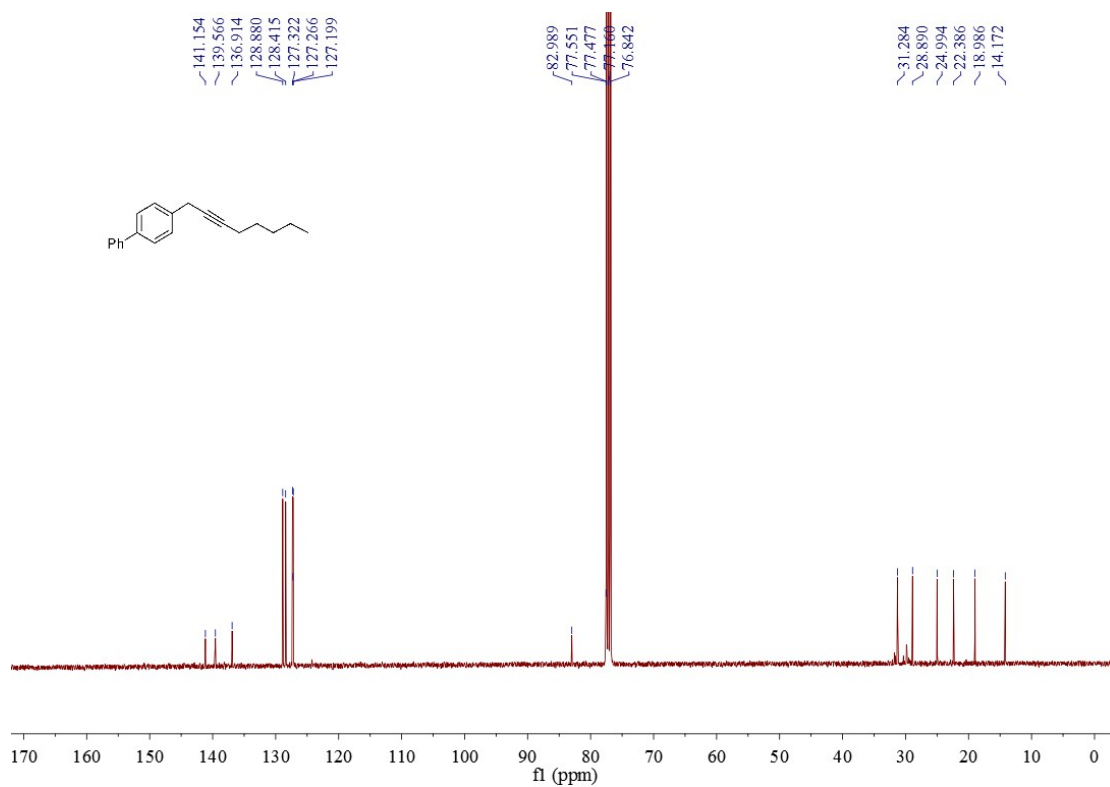

### 4-(pentadec-2-yn-1-yl)-1,1'-biphenyl c36

### <sup>1</sup>H NMR

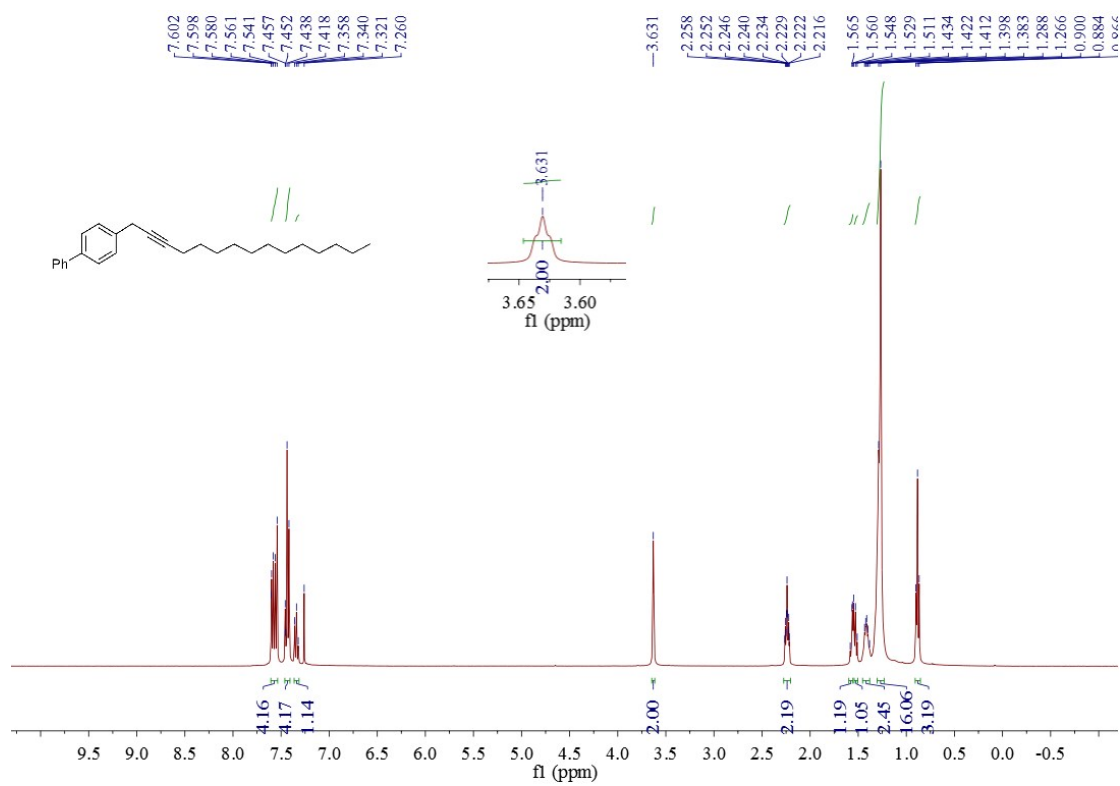

# <sup>13</sup>C NMR

141.133  
139.543  
136.896  
128.874  
128.407  
127.312  
127.259  
127.186

82.995  
77.544  
77.477  
77.160  
76.843

32.070  
29.847  
29.811  
29.799  
29.731  
29.521  
29.332  
29.182  
29.088  
24.987  
22.846  
19.009  
14.279

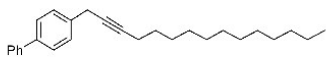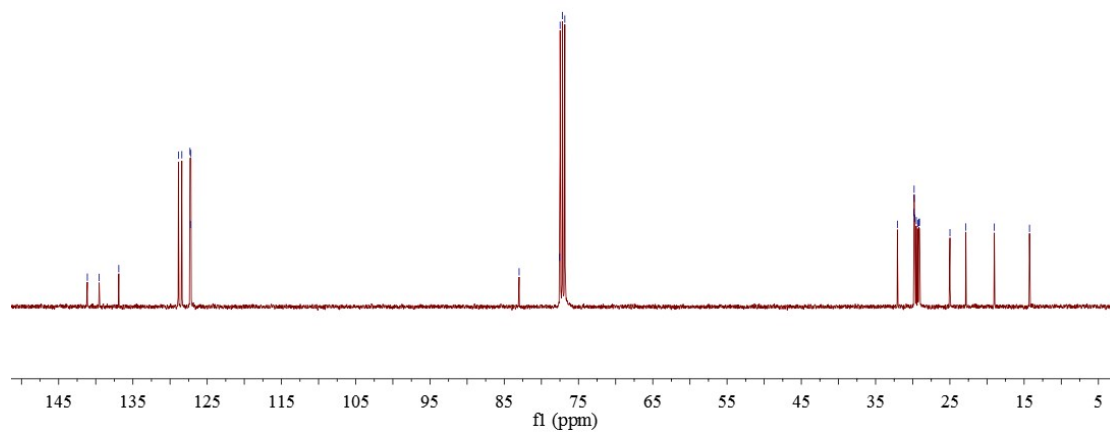

Supplement: d0ob00835d1.pdf [file d0ob00835d1.pdf]
